# Supplementary material for: Critical zone science in the Western US—Too much information?
Source: Frontiers journal article supplement (doi:10.3389/frwa.2023.1226612), 2023-11-02
Supplement: Table_1.xlsx [file Table_1.xlsx]

## Sheet: Navigating information overload
Progress	Duration (in seconds)	Finished	RecordedDate	Q1_1	Q1_2	Q1_3	Q2_1	Q2_2	Q2_3	Q3	Q4	Q4_14_TEXT	Q5	Q6	Q7	Q8	Q8b	Q9	Q9_7_TEXT	Q10	Q10_10_TEXT	Q11	Q12	Q12b	Q13	Q13_10_TEXT	Q14	Q15	Q16	Q17	Q18	Q19	Q20	Q21	Q22	Q23	Q24	Q25	Q26	Q26_6_TEXT	Q27	Q28	Q28b	Q29	Q30	Q31	Q31_13_TEXT	Q32	Q33
Progress	Duration (in seconds)	Finished	Recorded Date	Per year, how many peer-reviewed journal papers do you read (truly start to finish) in the following disciplines (averaged over the last 5 years)? - Earth Sciences	Per year, how many peer-reviewed journal papers do you read (truly start to finish) in the following disciplines (averaged over the last 5 years)? - Life Sciences	Per year, how many peer-reviewed journal papers do you read (truly start to finish) in the following disciplines (averaged over the last 5 years)? - Social Sciences	Per year, how many peer-reviewed papers do you skim (either by just reading the abstract or by examining a few figures) in the following disciplines (averaged over the last 5 years)? - Earth Sciences	Per year, how many peer-reviewed papers do you skim (either by just reading the abstract or by examining a few figures) in the following disciplines (averaged over the last 5 years)? - Life Sciences	Per year, how many peer-reviewed papers do you skim (either by just reading the abstract or by examining a few figures) in the following disciplines (averaged over the last 5 years)? - Social Sciences	Broadly speaking, which best describes your discipline?	Each "discipline" (as we define it) has numerous primary subdisciplines. Based on the subdisciplines below, THE BEST description of YOUR primary subdiscipline is ... - Selected Choice	Each "discipline" (as we define it) has numerous primary subdisciplines. Based on the subdisciplines below, THE BEST description of YOUR primary subdiscipline is ... - Other - Text	YOUR discipline is: [QID6-ChoiceGroup-SelectedChoices]. How familiar are you with the current peer-reviewed literature within this discipline?	YOUR primary subdiscipline is: [QID7-ChoiceGroup-SelectedChoices]. How familiar are you with current peer-reviewed literature in this subdiscipline?	YOUR primary subdiscipline is: [QID7-ChoiceGroup-SelectedChoices]. How well do you think you are keeping up with advances within YOUR subdiscipline?	YOUR primary subdiscipline is: [QID7-ChoiceGroup-SelectedChoices]. Is there a subfield(s) within this primary subdiscipline that you are more familiar with? For example, a groundwater hydrologist might be more familiar with the groundwater hydrology peer-reviewed literature than the general hydrology literature.	If Yes, how familiar are you with that literature?	YOUR primary subdiscipline is: [QID7-ChoiceGroup-SelectedChoices]. To keep up to date in this primary subdiscipline, which of the following do you rely on? Please select all that apply. - Selected Choice	YOUR primary subdiscipline is: [QID7-ChoiceGroup-SelectedChoices]. To keep up to date in this primary subdiscipline, which of the following do you rely on? Please select all that apply. - If "other", please tell us what you use: - Text	YOUR primary subdiscipline is: [QID7-ChoiceGroup-SelectedChoices]. What tools within your primary subdiscipline would you use to find a methodology, or evidence to support a conclusion? Please select all that apply. - Selected Choice	YOUR primary subdiscipline is: [QID7-ChoiceGroup-SelectedChoices]. What tools within your primary subdiscipline would you use to find a methodology, or evidence to support a conclusion? Please select all that apply. - If "other", please tell us what you use: - Text	YOUR primary subdiscipline is: [QID7-ChoiceGroup-SelectedChoices]. How easy is it to find information, like a methodology or evidence to support a conclusion, from your subdiscipline?	Is there another subfield(s) NOT within your primary subdiscipline (i.e. [QID7-ChoiceGroup-SelectedChoices]) that you are also familiar with? For example, as a hydrologist you might also read the meteorology/climatology literature ...	If Yes, how familiar are you with that peer-reviewed literature?	YOUR primary subdiscipline is: [QID7-ChoiceGroup-SelectedChoices]. What is your most common approach to finding new information from a DIFFERENT primary subdiscipline? - Selected Choice	YOUR primary subdiscipline is: [QID7-ChoiceGroup-SelectedChoices]. What is your most common approach to finding new information from a DIFFERENT primary subdiscipline? - If "other", please tell us what you use: - Text	YOUR primary subdiscipline is: [QID7-ChoiceGroup-SelectedChoices]. How easy is it to find information, like a methodology or evidence to support a conclusion, from a DIFFERENT primary subdiscipline?	On average how many lead author peer-reviewed journal papers have you published per year in the last 5 years? The lead author is the person that primarily carries out the research, and writes the manuscript.	On average, how many coauthored peer-reviewed journal papers have you published (not as the lead author) per year in the last 5 years?	On average, how many papers have you reviewed as a peer-reviewer per year in the past 5 years?	On average, how many times do you have to RE-READ the methods/techniques section of a peer-reviewed journal paper in order to achieve comprehension?	On average, how many times do you have to RE-READ sections of a peer-reviewed journal paper to comprehend a new advance in science?	Have you ever had to REPRODUCE the science described in a peer-reviewed journal paper? If so was this ...	Based on your knowledge, the state of the science used to understand and estimate how forest density reduction (i.e. fuel treatments) impacts wildfire risk is ... please pick the best description below based on your knowledge/current understanding	Based on your knowledge, the state of the science used to understand and estimate how climate change will alter the timing and magnitude of streamflow is ... please pick the best description below based on your knowledge/current understanding	Based on your knowledge, the state of the science used to understand the economic impact of climate change on western United States agricultural production is... please pick the best description below based on your knowledge/current understanding	New scientific information is integrated into natural resource management ...	The modeling tools (i.e. physically based fire models, hydrology models, forest health models) USED BY environmental managers incorporate new science ...	The primary barriers to the integration of new science into management are ... please select all that apply - Selected Choice	The primary barriers to the integration of new science into management are ... please select all that apply - Other - Text	Of the above, which do you think is the MOST problematic for the integration of new science into management?	What is your primary work affiliation?	During your career, your primary work affiliation was?	Within your area of expertise, are you:	How many employees work in your establishment?	What is your race? - Selected Choice	What is your race? - Other (please specify) - Text	What is your sex?	List of Countries
{"ImportId":"progress"}	{"ImportId":"duration"}	{"ImportId":"finished"}	{"ImportId":"recordedDate","timeZone":"America/Denver"}	{"ImportId":"QID15_1"}	{"ImportId":"QID15_2"}	{"ImportId":"QID15_3"}	{"ImportId":"QID16_1"}	{"ImportId":"QID16_2"}	{"ImportId":"QID16_3"}	{"ImportId":"QID6"}	{"ImportId":"QID7"}	{"ImportId":"QID7_14_TEXT"}	{"ImportId":"QID18"}	{"ImportId":"QID17"}	{"ImportId":"QID53"}	{"ImportId":"QID19"}	{"ImportId":"QID20"}	{"ImportId":"QID23"}	{"ImportId":"QID23_7_TEXT"}	{"ImportId":"QID24"}	{"ImportId":"QID24_10_TEXT"}	{"ImportId":"QID52"}	{"ImportId":"QID25"}	{"ImportId":"QID26"}	{"ImportId":"QID28"}	{"ImportId":"QID28_10_TEXT"}	{"ImportId":"QID27"}	{"ImportId":"QID8"}	{"ImportId":"QID9"}	{"ImportId":"QID10"}	{"ImportId":"QID50"}	{"ImportId":"QID51"}	{"ImportId":"QID48"}	{"ImportId":"QID31"}	{"ImportId":"QID32"}	{"ImportId":"QID33"}	{"ImportId":"QID34"}	{"ImportId":"QID35"}	{"ImportId":"QID36"}	{"ImportId":"QID36_6_TEXT"}	{"ImportId":"QID38"}	{"ImportId":"QID39"}	{"ImportId":"QID54"}	{"ImportId":"QID40"}	{"ImportId":"QID41"}	{"ImportId":"QID42"}	{"ImportId":"QID42_13_TEXT"}	{"ImportId":"QID43"}	{"ImportId":"QID45"}
100	622	TRUE	2021-02-26 16:55:37	11 to 50		Less than 10	51 and above		Less than 10	Earth Science	Remote Sensing		Very familiar	Very familiar	Moderately well	Yes	Extremely familiar	Peer-reviewed paper recommendations from others in my field (including via Twitter feeds),Professional conferences,Ad-hoc through paper reviews or literature reviews for a paper I'm writing,Personal communication, i.e. just talking to someone about a field		Reading peer-reviewed papers from that discipline,Reading synthesis papers from peer-reviewed literature,Contacting a colleague in that discipline,Google non-peer reviewed material, i.e. news articles, blogs etc.		Somewhat easy	Yes	Very familiar	Google scholar		Somewhat easy	1 - 3 papers per year	4 - 12 papers per year	4 - 12 papers per year	A few times (x2)	A few times (x2)	Challenging	Mature [We understand the underlying mechanisms, and have adequate techniques for monitoring, but there are a few areas where improvements are needed]	Developing [We understand the basics, but much additional science or technique development is required to address some fundamental sources of uncertainty]	Developing [We understand the basics, but fundamental sources of uncertainty remain]	>5 years	Sometimes	Too many sources of information,A lack of consensus within the science community,A lack of staff/personnel,Problems in the structure of the management agency (i.e. laws and regulations restrict the management organization or agency in using new science),Other	Funding to test and assess improvements; lack of accuracy characterizations that are relevant to the management application	A lack of staff/personnel	ACADEMIC		Mid career (10 - 20 yrs)	1000 or more	White		Male	United States of America
100	629	TRUE	2021-02-26 21:53:47	51 and above	Less than 10	Less than 10	51 and above	11 to 50	11 to 50	Earth Science	Snow/Glaciology		Moderately familiar	Extremely familiar	Moderately well	Yes	Extremely familiar	Regularly reading a particular peer-reviewed journal (or set of journals),Professional conferences,Ad-hoc through paper reviews or literature reviews for a paper I'm writing,Personal communication, i.e. just talking to someone about a field		Reading peer-reviewed papers from that discipline,Reading synthesis papers from peer-reviewed literature,Contacting a colleague in that discipline,Attend a conference,A research network, i.e. the Earth Science Research Network		Neither easy nor difficult	Yes	Moderately familiar	Reading synthesis papers from peer-reviewed literature		Neither easy nor difficult	4 - 12 papers per year	4 - 12 papers per year	4 - 12 papers per year	Once	Once	Somewhat Challenging	Developing [We understand the basics, but much additional science or technique development is required to address some fundamental sources of uncertainty]	Developing [We understand the basics, but much additional science or technique development is required to address some fundamental sources of uncertainty]	Developing [We understand the basics, but fundamental sources of uncertainty remain]	>5 years	Sometimes	A lack of synthesis,A lack of staff/personnel,Problems in the structure of the management agency (i.e. laws and regulations restrict the management organization or agency in using new science)		A lack of synthesis	RETIRED	ACADEMIC	Senior (20 yrs +)	1000 or more	White		Male	United States of America
100	447	TRUE	2021-03-01 14:44:50	Less than 10	Less than 10	Less than 10	Less than 10	None	None	Earth Science	Sustainability Science		Moderately familiar	Very familiar	Poorly	No		Regularly reading a particular peer-reviewed journal (or set of journals),Personal communication, i.e. just talking to someone about a field		Reading synthesis papers from peer-reviewed literature,Contacting a colleague in that discipline		Somewhat easy	No		Google scholar		Neither easy nor difficult	1 - 3 papers per year	1 - 3 papers per year	1 - 3 papers per year	Once	A few times (x2)	I have never needed to do this	I do not know	Mature [We understand the underlying mechanisms, and have adequate techniques for monitoring, but there are a few areas where improvements are needed]	Mature [We understand the underlying mechanisms, but there is room for improvement]	>5 years	Sometimes	Too many sources of information,A lack of synthesis,Problems in the structure of the management agency (i.e. laws and regulations restrict the management organization or agency in using new science)		A lack of synthesis	ACADEMIC		Senior (20 yrs +)	1000 or more	White		Male	United States of America
100	641	TRUE	2021-03-01 17:42:28	Less than 10	Less than 10	None	51 and above	11 to 50		Life Science	Fire Ecology		Moderately familiar	Very familiar	Moderately well	Yes	Extremely familiar	Peer-reviewed paper recommendations from others in my field (including via Twitter feeds),Professional conferences,Ad-hoc through paper reviews or literature reviews for a paper I'm writing,Personal communication, i.e. just talking to someone about a field,Non peer-reviewed material, i.e. news articles, websites and blogs		Reading peer-reviewed papers from that discipline,Reading synthesis papers from peer-reviewed literature,Contacting a colleague in that discipline,Attend a conference,A research network, i.e. the Earth Science Research Network		Neither easy nor difficult	Yes	Very familiar	Reading peer-reviewed papers from that discipline		Neither easy nor difficult	1 - 3 papers per year	1 - 3 papers per year	4 - 12 papers per year	Once	Once	Somewhat Challenging	Developing [We understand the basics, but much additional science or technique development is required to address some fundamental sources of uncertainty]	Developing [We understand the basics, but much additional science or technique development is required to address some fundamental sources of uncertainty]	Starting [We are just beginning to understand what is going on]	>10 years	Sometimes	Too many sources of information,A lack of access to information,A lack of synthesis,A lack of consensus within the science community,A lack of staff/personnel,Problems in the structure of the management agency (i.e. laws and regulations restrict the management organization or agency in using new science)		A lack of synthesis	ACADEMIC		Early career (1 - 10 yrs)	2021-05-09	White		Female	United States of America
100	651	TRUE	2021-03-01 20:00:47	11 to 50	11 to 50	Less than 10	51 and above	11 to 50	Less than 10	Life Science	Natural Resource Management		Moderately familiar	Moderately familiar	Moderately well	Yes	Moderately familiar	Professional conferences,Ad-hoc through paper reviews or literature reviews for a paper I'm writing,Non peer-reviewed material, i.e. news articles, websites and blogs		Reading peer-reviewed papers from that discipline,Reading synthesis papers from peer-reviewed literature,Wikipedia,Contacting a colleague in that discipline,Google non-peer reviewed material, i.e. news articles, blogs etc.		Neither easy nor difficult	No		Google scholar		Somewhat difficult	1 - 3 papers per year	1 - 3 papers per year	1 - 3 papers per year	Several times (x3)	A few times (x2)	Challenging	Starting [We are just beginning to understand what is going on]	Developing [We understand the basics, but much additional science or technique development is required to address some fundamental sources of uncertainty]	Mature [We understand the underlying mechanisms, but there is room for improvement]	I do not know	I do not know	Too many sources of information,A lack of synthesis,A lack of consensus within the science community		A lack of synthesis	PRIVATE-FOR-PROFIT company, business or individual, for wages, salary or commissions		Early career (1 - 10 yrs)	250-499	White		Female	United States of America
100	642	TRUE	2021-03-03 18:25:45	None	Less than 10	None	Less than 10	Less than 10	None	Life Science	Natural Resource Management		Slightly familiar	Slightly familiar	Poorly	Yes	Moderately familiar	Peer-reviewed paper recommendations from others in my field (including via Twitter feeds),Personal communication, i.e. just talking to someone about a field,Non peer-reviewed material, i.e. news articles, websites and blogs		Reading peer-reviewed papers from that discipline,Reading synthesis papers from peer-reviewed literature,Contacting a colleague in that discipline,Textbooks, or other education materials		Neither easy nor difficult	No		Contacting a colleague in that discipline		Neither easy nor difficult	None	None	None	Once	Once	Somewhat Easy	Developing [We understand the basics, but much additional science or technique development is required to address some fundamental sources of uncertainty]	I do not know	Developing [We understand the basics, but fundamental sources of uncertainty remain]	>5 years	I do not know	A lack of access to information,A lack of synthesis,A lack of staff/personnel		A lack of staff/personnel	Federal GOVERNMENT employee		Mid career (10 - 20 yrs)	20-49	White		Male	United States of America
100	744	TRUE	2021-03-04 10:20:30	11 to 50	Less than 10	Less than 10	11 to 50	Less than 10	Less than 10	Earth Science	Natural Resource Management		Slightly familiar	Slightly familiar	Moderately well	Yes	Moderately familiar	Ad-hoc through paper reviews or literature reviews for a paper I'm writing		Reading peer-reviewed papers from that discipline,Reading synthesis papers from peer-reviewed literature,Google non-peer reviewed material, i.e. news articles, blogs etc.		Somewhat easy	No		Reading synthesis papers from peer-reviewed literature		Neither easy nor difficult	None	None	None	Several times (x3)	Several times (x3)	Challenging	Mature [We understand the underlying mechanisms, and have adequate techniques for monitoring, but there are a few areas where improvements are needed]	Developing [We understand the basics, but much additional science or technique development is required to address some fundamental sources of uncertainty]	Developing [We understand the basics, but fundamental sources of uncertainty remain]	>5 years	Sometimes	A lack of synthesis,A lack of staff/personnel,Problems in the structure of the management agency (i.e. laws and regulations restrict the management organization or agency in using new science),I do not know		A lack of staff/personnel	ACADEMIC		Early career (1 - 10 yrs)		White		Female	United States of America
100	516	TRUE	2021-03-04 12:27:10	11 to 50	11 to 50	Less than 10	51 and above	51 and above	11 to 50	Life Science	Fire Ecology		Moderately familiar	Very familiar	Moderately well	Yes	Moderately familiar	Peer-reviewed paper recommendations from others in my field (including via Twitter feeds),Personal communication, i.e. just talking to someone about a field		Reading peer-reviewed papers from that discipline,Reading synthesis papers from peer-reviewed literature,Contacting a colleague in that discipline		Somewhat easy	Yes	Moderately familiar	Contacting a colleague in that discipline		Neither easy nor difficult	1 - 3 papers per year	None	None	A few times (x2)	A few times (x2)	I have never needed to do this	Mature [We understand the underlying mechanisms, and have adequate techniques for monitoring, but there are a few areas where improvements are needed]	Advanced [We can quantify the uncertainty and know the driving mechanisms]	I do not know	Within a few years	Frequently	A lack of staff/personnel,Problems in the structure of the management agency (i.e. laws and regulations restrict the management organization or agency in using new science)		A lack of staff/personnel	Federal GOVERNMENT employee		Mid career (10 - 20 yrs)	1000 or more	White		Male	United States of America
100	733	TRUE	2021-03-04 13:00:14	11 to 50	Less than 10	Less than 10	11 to 50	11 to 50	Less than 10	Earth Science	Hydrology		Moderately familiar	Moderately familiar	Poorly	Yes	Moderately familiar	Peer-reviewed paper recommendations from others in my field (including via Twitter feeds),Professional conferences,Ad-hoc through paper reviews or literature reviews for a paper I'm writing		Reading peer-reviewed papers from that discipline,Reading synthesis papers from peer-reviewed literature,Contacting a colleague in that discipline,Textbooks, or other education materials		Neither easy nor difficult	Yes	Moderately familiar	Reading synthesis papers from peer-reviewed literature		Somewhat difficult	1 - 3 papers per year	1 - 3 papers per year	1 - 3 papers per year	A few times (x2)	A few times (x2)	I have never needed to do this	Mature [We understand the underlying mechanisms, and have adequate techniques for monitoring, but there are a few areas where improvements are needed]	Advanced [We can quantify the uncertainty and know the driving mechanisms]	I do not know	>5 years	Sometimes	A lack of synthesis,A lack of staff/personnel,Other	Lack of agency personnel whose job it is to translate new science to management	A lack of synthesis	Federal GOVERNMENT employee		Mid career (10 - 20 yrs)	20-49	White		Male	United States of America
100	2048	TRUE	2021-03-04 13:31:36	Less than 10	Less than 10	Less than 10	Less than 10	Less than 10	Less than 10	Life Science	Natural Resource Management		Slightly familiar	Moderately familiar	Poorly	Yes	Moderately familiar	Peer-reviewed paper recommendations from others in my field (including via Twitter feeds),Professional conferences,Non peer-reviewed material, i.e. news articles, websites and blogs		Reading peer-reviewed papers from that discipline,Reading synthesis papers from peer-reviewed literature		Neither easy nor difficult	Yes	Slightly familiar	Reading synthesis papers from peer-reviewed literature		Somewhat difficult	None	None	1 - 3 papers per year	A few times (x2)	Several times (x3)	Not Easy; Not Challenging	Developing [We understand the basics, but much additional science or technique development is required to address some fundamental sources of uncertainty]	Developing [We understand the basics, but much additional science or technique development is required to address some fundamental sources of uncertainty]	Developing [We understand the basics, but fundamental sources of uncertainty remain]	I do not know	I do not know	A lack of synthesis,A lack of staff/personnel		A lack of synthesis	Federal GOVERNMENT employee		Senior (20 yrs +)	50-99	White		Female	United States of America
100	694	TRUE	2021-03-04 13:53:27	Less than 10	Less than 10	None	11 to 50	11 to 50	None	Earth Science	Hydrology		Moderately familiar	Moderately familiar	Moderately well	Yes	Moderately familiar	Peer-reviewed paper recommendations from others in my field (including via Twitter feeds),Professional conferences,Ad-hoc through paper reviews or literature reviews for a paper I'm writing,Personal communication, i.e. just talking to someone about a field		Reading peer-reviewed papers from that discipline,Reading synthesis papers from peer-reviewed literature,Contacting a colleague in that discipline,Textbooks, or other education materials,A research network, i.e. the Earth Science Research Network		Somewhat easy			Reading synthesis papers from peer-reviewed literature		Somewhat difficult	None	None	None	A few times (x2)	A few times (x2)	I have never needed to do this	Mature [We understand the underlying mechanisms, and have adequate techniques for monitoring, but there are a few areas where improvements are needed]	Developing [We understand the basics, but much additional science or technique development is required to address some fundamental sources of uncertainty]	Developing [We understand the basics, but fundamental sources of uncertainty remain]	>5 years	Sometimes	Too many sources of information,A lack of access to information,A lack of synthesis,A lack of staff/personnel		A lack of staff/personnel	PRIVATE-NOT-FOR-PROFIT, tax-exempt, charitable organization		Early career (1 - 10 yrs)	50-99	White		Male	United States of America
100	407	TRUE	2021-03-04 14:50:50	Less than 10	Less than 10	Less than 10	51 and above	51 and above	51 and above	Earth Science	Natural Resource Management		Moderately familiar	Very familiar	Poorly	Yes	Very familiar	Peer-reviewed paper recommendations from others in my field (including via Twitter feeds),Professional conferences,Non peer-reviewed material, i.e. news articles, websites and blogs		Reading peer-reviewed papers from that discipline,Reading synthesis papers from peer-reviewed literature,Contacting a colleague in that discipline,Google non-peer reviewed material, i.e. news articles, blogs etc.		Neither easy nor difficult	Yes	Moderately familiar	Google non-peer reviewed material		Neither easy nor difficult	1 - 3 papers per year	1 - 3 papers per year	1 - 3 papers per year	Several times (x3)	Several times (x3)	Challenging	Mature [We understand the underlying mechanisms, and have adequate techniques for monitoring, but there are a few areas where improvements are needed]	Mature [We understand the underlying mechanisms, and have adequate techniques for monitoring, but there are a few areas where improvements are needed]	Mature [We understand the underlying mechanisms, but there is room for improvement]	Within a few years	Sometimes	Too many sources of information,A lack of access to information,A lack of synthesis,A lack of staff/personnel		A lack of synthesis	PRIVATE-NOT-FOR-PROFIT, tax-exempt, charitable organization		Mid career (10 - 20 yrs)	2021-10-19	White		Male	United States of America
100	520	TRUE	2021-03-04 16:48:45	51 and above	51 and above	11 to 50	51 and above	51 and above	51 and above	Life Science	Other	Forest Ecology	Very familiar	Extremely familiar	Moderately well	No		Regularly reading a particular peer-reviewed journal (or set of journals),Peer-reviewed paper recommendations from others in my field (including via Twitter feeds),Professional conferences,Ad-hoc through paper reviews or literature reviews for a paper I'm writing,Personal communication, i.e. just talking to someone about a field,Non peer-reviewed material, i.e. news articles, websites and blogs		Reading peer-reviewed papers from that discipline,Reading synthesis papers from peer-reviewed literature,Contacting a colleague in that discipline,Attend a conference,Textbooks, or other education materials,A research network, i.e. the Earth Science Research Network		Somewhat easy	Yes	Moderately familiar	Google scholar		Neither easy nor difficult	1 - 3 papers per year	1 - 3 papers per year	4 - 12 papers per year	A few times (x2)	A few times (x2)	Somewhat Challenging	Developing [We understand the basics, but much additional science or technique development is required to address some fundamental sources of uncertainty]	Developing [We understand the basics, but much additional science or technique development is required to address some fundamental sources of uncertainty]	Developing [We understand the basics, but fundamental sources of uncertainty remain]	>5 years	Sometimes	A lack of synthesis,A lack of staff/personnel,Problems in the structure of the management agency (i.e. laws and regulations restrict the management organization or agency in using new science)		Problems in the structure of the management agency (i.e. laws and regulations restrict the management organization or agency in using new science)	Federal GOVERNMENT employee		Senior (20 yrs +)	100-249	Prefer not to say		Male	United States of America
100	400	TRUE	2021-03-04 18:00:36	Less than 10	Less than 10	None	11 to 50	Less than 10	Less than 10	Earth Science	Meteorology/Climatology		Very familiar	Very familiar	Moderately well	Yes	Extremely familiar	Peer-reviewed paper recommendations from others in my field (including via Twitter feeds),Professional conferences,Ad-hoc through paper reviews or literature reviews for a paper I'm writing,Non peer-reviewed material, i.e. news articles, websites and blogs		Reading peer-reviewed papers from that discipline,Reading synthesis papers from peer-reviewed literature,Wikipedia,Google non-peer reviewed material, i.e. news articles, blogs etc.,Attend a conference		Somewhat easy	Yes	Moderately familiar	Google scholar		Neither easy nor difficult	1 - 3 papers per year	1 - 3 papers per year	4 - 12 papers per year	Several times (x3)	A few times (x2)	I have never needed to do this	Developing [We understand the basics, but much additional science or technique development is required to address some fundamental sources of uncertainty]	Mature [We understand the underlying mechanisms, and have adequate techniques for monitoring, but there are a few areas where improvements are needed]	Developing [We understand the basics, but fundamental sources of uncertainty remain]	>5 years	Sometimes	Too many sources of information,A lack of consensus within the science community,Problems in the structure of the management agency (i.e. laws and regulations restrict the management organization or agency in using new science)		A lack of consensus within the science community	ACADEMIC		Early career (1 - 10 yrs)	1000 or more	Other (please specify)	Middle Eastern	Female	United States of America
100	292	TRUE	2021-03-04 18:39:51	11 to 50	11 to 50	Less than 10	11 to 50	11 to 50	Less than 10	Earth Science	Hydrology		Moderately familiar	Very familiar	Moderately well	Yes	Very familiar	Professional conferences,Ad-hoc through paper reviews or literature reviews for a paper I'm writing,Personal communication, i.e. just talking to someone about a field,Non peer-reviewed material, i.e. news articles, websites and blogs		Reading peer-reviewed papers from that discipline,Contacting a colleague in that discipline,Attend a conference,Textbooks, or other education materials,A research network, i.e. the Earth Science Research Network		Neither easy nor difficult	Yes	Moderately familiar	Reading synthesis papers from peer-reviewed literature		Somewhat easy	None	None	None	Several times (x3)	Many times (>4)	Somewhat Challenging	Developing [We understand the basics, but much additional science or technique development is required to address some fundamental sources of uncertainty]	Developing [We understand the basics, but much additional science or technique development is required to address some fundamental sources of uncertainty]	Developing [We understand the basics, but fundamental sources of uncertainty remain]	>5 years	Rarely	Too many sources of information,A lack of access to information,A lack of synthesis,I do not know		I do not know	ACADEMIC		Early career (1 - 10 yrs)	100-249	White		Female	United States of America
100	518	TRUE	2021-03-04 19:08:29	11 to 50	11 to 50	None	11 to 50	11 to 50	Less than 10	Earth Science	Fire Ecology		Slightly familiar	Moderately familiar	Moderately well	No		Regularly reading a particular peer-reviewed journal (or set of journals),Professional conferences,Personal communication, i.e. just talking to someone about a field,Non peer-reviewed material, i.e. news articles, websites and blogs		Reading peer-reviewed papers from that discipline,Reading synthesis papers from peer-reviewed literature,Google non-peer reviewed material, i.e. news articles, blogs etc.		Neither easy nor difficult	Yes	Moderately familiar	Google non-peer reviewed material		Somewhat easy	None	None	None	A few times (x2)	A few times (x2)	I have never needed to do this	Mature [We understand the underlying mechanisms, and have adequate techniques for monitoring, but there are a few areas where improvements are needed]	Developing [We understand the basics, but much additional science or technique development is required to address some fundamental sources of uncertainty]	Mature [We understand the underlying mechanisms, but there is room for improvement]	>5 years	Sometimes	Too many sources of information,A lack of synthesis,A lack of consensus within the science community,Problems in the structure of the management agency (i.e. laws and regulations restrict the management organization or agency in using new science)		Problems in the structure of the management agency (i.e. laws and regulations restrict the management organization or agency in using new science)	ACADEMIC		Early career (1 - 10 yrs)	50-99	White		Male	United States of America
100	472	TRUE	2021-03-04 19:52:44	None	Less than 10	None	None	11 to 50	Less than 10	Life Science	Sustainability Science		Moderately familiar	Moderately familiar	Poorly	Yes	Moderately familiar	Non peer-reviewed material, i.e. news articles, websites and blogs		Reading synthesis papers from peer-reviewed literature,Wikipedia,A research network, i.e. the Earth Science Research Network		Very difficult	Yes	Slightly familiar	A research network, i.e. the Earth Science Research Network		Somewhat difficult	None	1 - 3 papers per year	None	Once	Once	I have never needed to do this	Mature [We understand the underlying mechanisms, and have adequate techniques for monitoring, but there are a few areas where improvements are needed]	Developing [We understand the basics, but much additional science or technique development is required to address some fundamental sources of uncertainty]	Mature [We understand the underlying mechanisms, but there is room for improvement]	>10 years	Rarely	A lack of consensus within the science community		A lack of synthesis	PRIVATE-NOT-FOR-PROFIT, tax-exempt, charitable organization		Mid career (10 - 20 yrs)	2021-10-19	Prefer not to say		Prefer not to say	United States of America
100	8446	TRUE	2021-03-04 22:04:55	11 to 50	11 to 50	Less than 10	51 and above	51 and above	11 to 50	Earth Science	Hydrology		Moderately familiar	Moderately familiar	Moderately well	Yes	Very familiar	Peer-reviewed paper recommendations from others in my field (including via Twitter feeds),Ad-hoc through paper reviews or literature reviews for a paper I'm writing,Non peer-reviewed material, i.e. news articles, websites and blogs,If "other", please tell us what you use:	Google scholar alerts	Reading peer-reviewed papers from that discipline,Reading synthesis papers from peer-reviewed literature,Textbooks, or other education materials		Somewhat easy	Yes	Moderately familiar	Reading synthesis papers from peer-reviewed literature		Neither easy nor difficult	1 - 3 papers per year	1 - 3 papers per year	4 - 12 papers per year	Several times (x3)	A few times (x2)	Somewhat Challenging	Mature [We understand the underlying mechanisms, and have adequate techniques for monitoring, but there are a few areas where improvements are needed]	Mature [We understand the underlying mechanisms, and have adequate techniques for monitoring, but there are a few areas where improvements are needed]	I do not know	>5 years	Rarely	Too many sources of information,A lack of synthesis,A lack of staff/personnel,Problems in the structure of the management agency (i.e. laws and regulations restrict the management organization or agency in using new science)		A lack of staff/personnel	ACADEMIC		Early career (1 - 10 yrs)	1000 or more	White		Male	United States of America
100	375	TRUE	2021-03-05 00:01:44	11 to 50		Less than 10	51 and above		Less than 10	Earth Science	Hydrology		Very familiar	Extremely familiar	Very well	Yes	Extremely familiar	Regularly reading a particular peer-reviewed journal (or set of journals),Peer-reviewed paper recommendations from others in my field (including via Twitter feeds),Professional conferences,Ad-hoc through paper reviews or literature reviews for a paper I'm writing,Personal communication, i.e. just talking to someone about a field,Non peer-reviewed material, i.e. news articles, websites and blogs		Reading peer-reviewed papers from that discipline,Contacting a colleague in that discipline,Google non-peer reviewed material, i.e. news articles, blogs etc.,Textbooks, or other education materials,A research network, i.e. the Earth Science Research Network		Neither easy nor difficult	Yes	Very familiar	Reading peer-reviewed papers from that discipline		Somewhat easy	1 - 3 papers per year	1 - 3 papers per year	4 - 12 papers per year	A few times (x2)	A few times (x2)	Somewhat Challenging	I do not know	Mature [We understand the underlying mechanisms, and have adequate techniques for monitoring, but there are a few areas where improvements are needed]	Starting [We are just beginning to understand what is going on]	I do not know	I do not know	Too many sources of information,A lack of synthesis,A lack of consensus within the science community		Too many sources of information	ACADEMIC		Early career (1 - 10 yrs)	2021-10-19	Asian Indian		Female	India
100	593	TRUE	2021-03-05 00:58:37	Less than 10	None	None	11 to 50	None	Less than 10	Earth Science	Water Resource Management		Slightly familiar	Moderately familiar	Poorly	Yes	Moderately familiar	Professional conferences,Personal communication, i.e. just talking to someone about a field,Non peer-reviewed material, i.e. news articles, websites and blogs		Reading peer-reviewed papers from that discipline,Reading synthesis papers from peer-reviewed literature,Contacting a colleague in that discipline,Attend a conference,Textbooks, or other education materials		Neither easy nor difficult	No		Google scholar		Somewhat difficult	None	None	None	Several times (x3)	Once	Somewhat Challenging	Starting [We are just beginning to understand what is going on]	Mature [We understand the underlying mechanisms, and have adequate techniques for monitoring, but there are a few areas where improvements are needed]	Developing [We understand the basics, but fundamental sources of uncertainty remain]	I do not know	Rarely	Too many sources of information,A lack of access to information,Problems in the structure of the management agency (i.e. laws and regulations restrict the management organization or agency in using new science)		Problems in the structure of the management agency (i.e. laws and regulations restrict the management organization or agency in using new science)	PRIVATE-FOR-PROFIT company, business or individual, for wages, salary or commissions		Early career (1 - 10 yrs)	1000 or more	White		Female	United States of America
100	451	TRUE	2021-03-05 06:46:00	11 to 50	None	Less than 10	51 and above	None	Less than 10	Earth Science	Hydrology		Slightly familiar	Very familiar	Moderately well	Yes	Very familiar	Peer-reviewed paper recommendations from others in my field (including via Twitter feeds),Professional conferences,Ad-hoc through paper reviews or literature reviews for a paper I'm writing,Non peer-reviewed material, i.e. news articles, websites and blogs,If "other", please tell us what you use:	Journal alerts and listservs	Reading peer-reviewed papers from that discipline,Reading synthesis papers from peer-reviewed literature,Attend a conference,Textbooks, or other education materials		Somewhat easy	No		Reading synthesis papers from peer-reviewed literature		Neither easy nor difficult	1 - 3 papers per year	1 - 3 papers per year	4 - 12 papers per year	A few times (x2)	Several times (x3)	Challenging	Developing [We understand the basics, but much additional science or technique development is required to address some fundamental sources of uncertainty]	Starting [We are just beginning to understand what is going on]	Starting [We are just beginning to understand what is going on]	>5 years	Rarely	Too many sources of information,A lack of synthesis,A lack of consensus within the science community,Other	Difficulty in communication, lack of incentives to translate research to policy	Too many sources of information	ACADEMIC		Early career (1 - 10 yrs)	1000 or more	White		Male	United States of America
100	510	TRUE	2021-03-05 06:55:18	Less than 10			11 to 50			Earth Science	Hydrology		Very familiar	Extremely familiar	Very well	Yes	Extremely familiar	Regularly reading a particular peer-reviewed journal (or set of journals),Peer-reviewed paper recommendations from others in my field (including via Twitter feeds),Professional conferences,Ad-hoc through paper reviews or literature reviews for a paper I'm writing		Reading peer-reviewed papers from that discipline,Reading synthesis papers from peer-reviewed literature,Wikipedia,Contacting a colleague in that discipline,Attend a conference,Textbooks, or other education materials,A research network, i.e. the Earth Science Research Network		Somewhat easy	Yes	Slightly familiar	Google scholar		Neither easy nor difficult	1 - 3 papers per year	4 - 12 papers per year	4 - 12 papers per year	A few times (x2)	A few times (x2)	Challenging	Mature [We understand the underlying mechanisms, and have adequate techniques for monitoring, but there are a few areas where improvements are needed]	Mature [We understand the underlying mechanisms, and have adequate techniques for monitoring, but there are a few areas where improvements are needed]	Developing [We understand the basics, but fundamental sources of uncertainty remain]	>10 years	Sometimes	A lack of access to information,Problems in the structure of the management agency (i.e. laws and regulations restrict the management organization or agency in using new science),Other	Institutional momentum	Problems in the structure of the management agency (i.e. laws and regulations restrict the management organization or agency in using new science)	ACADEMIC		Senior (20 yrs +)	1000 or more	White		Male	United States of America
100	422	TRUE	2021-03-05 07:40:46	51 and above	11 to 50	Less than 10	51 and above	51 and above	11 to 50	Earth Science	Hydrology		Moderately familiar	Moderately familiar	Moderately well	Yes	Very familiar	Peer-reviewed paper recommendations from others in my field (including via Twitter feeds),Professional conferences,Ad-hoc through paper reviews or literature reviews for a paper I'm writing,Personal communication, i.e. just talking to someone about a field,If "other", please tell us what you use:	Mendelay recomendations	Reading peer-reviewed papers from that discipline,Contacting a colleague in that discipline,Textbooks, or other education materials		Somewhat easy	Yes	Moderately familiar	Reading synthesis papers from peer-reviewed literature		Neither easy nor difficult	1 - 3 papers per year	None	None	Several times (x3)	Several times (x3)	Somewhat Challenging	Developing [We understand the basics, but much additional science or technique development is required to address some fundamental sources of uncertainty]	Developing [We understand the basics, but much additional science or technique development is required to address some fundamental sources of uncertainty]	I do not know	>5 years	Rarely	Problems in the structure of the management agency (i.e. laws and regulations restrict the management organization or agency in using new science)		Problems in the structure of the management agency (i.e. laws and regulations restrict the management organization or agency in using new science)	ACADEMIC		Early career (1 - 10 yrs)	500-999	White		Male	United States of America
100	316	TRUE	2021-03-05 08:40:29	Less than 10	Less than 10	Less than 10	Less than 10	Less than 10	Less than 10	Earth Science	Geology & Geophysics		Slightly familiar	Slightly familiar	Poorly	Yes	Moderately familiar	Peer-reviewed paper recommendations from others in my field (including via Twitter feeds),Professional conferences,Personal communication, i.e. just talking to someone about a field,Non peer-reviewed material, i.e. news articles, websites and blogs		Reading peer-reviewed papers from that discipline,Reading synthesis papers from peer-reviewed literature,Contacting a colleague in that discipline,Attend a conference,A research network, i.e. the Earth Science Research Network		Neither easy nor difficult	Yes	Slightly familiar	Contacting a colleague in that discipline		Somewhat difficult	None	1 - 3 papers per year	1 - 3 papers per year	A few times (x2)	A few times (x2)	Somewhat Challenging	Developing [We understand the basics, but much additional science or technique development is required to address some fundamental sources of uncertainty]	Developing [We understand the basics, but much additional science or technique development is required to address some fundamental sources of uncertainty]	Developing [We understand the basics, but fundamental sources of uncertainty remain]	>5 years	Rarely	A lack of staff/personnel		A lack of staff/personnel	State GOVERNMENT employee		Senior (20 yrs +)	20-49	White		Female	United States of America
100	432	TRUE	2021-03-05 09:23:18	11 to 50	None	None	11 to 50	None	None	Earth Science	Hydrology		Slightly familiar	Moderately familiar	Poorly	Yes	Slightly familiar	Peer-reviewed paper recommendations from others in my field (including via Twitter feeds),Ad-hoc through paper reviews or literature reviews for a paper I'm writing,Personal communication, i.e. just talking to someone about a field,Non peer-reviewed material, i.e. news articles, websites and blogs		Reading peer-reviewed papers from that discipline,Reading synthesis papers from peer-reviewed literature,Contacting a colleague in that discipline		Neither easy nor difficult	Yes	Slightly familiar	If "other", please tell us what you use:	Colleagues from large interdisciplinary projects	Neither easy nor difficult	1 - 3 papers per year	4 - 12 papers per year	4 - 12 papers per year	Once	A few times (x2)	I have never needed to do this	I do not know	I do not know	I do not know	I do not know	I do not know	I do not know		I do not know	ACADEMIC		Mid career (10 - 20 yrs)	1000 or more	White		Female	United States of America
100	395	TRUE	2021-03-05 09:47:18	11 to 50	11 to 50	Less than 10	51 and above	51 and above	11 to 50	Earth Science	Hydrology		Very familiar	Extremely familiar	Very well	Yes	Extremely familiar	Regularly reading a particular peer-reviewed journal (or set of journals),Peer-reviewed paper recommendations from others in my field (including via Twitter feeds),Professional conferences,Ad-hoc through paper reviews or literature reviews for a paper I'm writing,Personal communication, i.e. just talking to someone about a field,Non peer-reviewed material, i.e. news articles, websites and blogs		Reading peer-reviewed papers from that discipline,Reading synthesis papers from peer-reviewed literature,Contacting a colleague in that discipline,Attend a conference,Textbooks, or other education materials,A research network, i.e. the Earth Science Research Network		Somewhat easy	Yes	Very familiar	Reading synthesis papers from peer-reviewed literature		Somewhat easy	1 - 3 papers per year	4 - 12 papers per year	13 - 49 papers per year	A few times (x2)	A few times (x2)	Not Easy; Not Challenging	Developing [We understand the basics, but much additional science or technique development is required to address some fundamental sources of uncertainty]	Developing [We understand the basics, but much additional science or technique development is required to address some fundamental sources of uncertainty]	Starting [We are just beginning to understand what is going on]	>10 years	Rarely	Too many sources of information,A lack of synthesis,A lack of consensus within the science community,A lack of staff/personnel,Problems in the structure of the management agency (i.e. laws and regulations restrict the management organization or agency in using new science)		A lack of synthesis	ACADEMIC		Senior (20 yrs +)	1000 or more	White		Male	United States of America
100	426	TRUE	2021-03-05 10:03:43	11 to 50	Less than 10	Less than 10	11 to 50	Less than 10	Less than 10	Earth Science	Sustainability Science		Very familiar	Extremely familiar	Very well	Yes	Extremely familiar	Regularly reading a particular peer-reviewed journal (or set of journals),Professional conferences,Personal communication, i.e. just talking to someone about a field,Non peer-reviewed material, i.e. news articles, websites and blogs,If "other", please tell us what you use:	Google scholar alerts, mendeley digests	Reading peer-reviewed papers from that discipline,Reading synthesis papers from peer-reviewed literature,Attend a conference,Textbooks, or other education materials		Somewhat easy	Yes	Moderately familiar	Google scholar		Neither easy nor difficult	1 - 3 papers per year	4 - 12 papers per year	4 - 12 papers per year	Several times (x3)	Several times (x3)	Challenging	Starting [We are just beginning to understand what is going on]	Developing [We understand the basics, but much additional science or technique development is required to address some fundamental sources of uncertainty]	Developing [We understand the basics, but fundamental sources of uncertainty remain]	>5 years	Sometimes	Too many sources of information,A lack of synthesis,Problems in the structure of the management agency (i.e. laws and regulations restrict the management organization or agency in using new science)		Problems in the structure of the management agency (i.e. laws and regulations restrict the management organization or agency in using new science)	ACADEMIC		Mid career (10 - 20 yrs)	1000 or more	White		Male	United States of America
100	608	TRUE	2021-03-05 10:18:31	None	None	None	11 to 50	51 and above	11 to 50	Life Science	Fire Ecology		Moderately familiar	Moderately familiar	Moderately well	No		Regularly reading a particular peer-reviewed journal (or set of journals)		Reading synthesis papers from peer-reviewed literature		Somewhat easy			Reading synthesis papers from peer-reviewed literature		Somewhat easy	1 - 3 papers per year	None	1 - 3 papers per year	Once	A few times (x2)	I have never needed to do this	Developing [We understand the basics, but much additional science or technique development is required to address some fundamental sources of uncertainty]	Starting [We are just beginning to understand what is going on]	Developing [We understand the basics, but fundamental sources of uncertainty remain]	>5 years	Sometimes	A lack of synthesis,A lack of consensus within the science community,A lack of staff/personnel,Problems in the structure of the management agency (i.e. laws and regulations restrict the management organization or agency in using new science)		A lack of consensus within the science community	State GOVERNMENT employee		Mid career (10 - 20 yrs)	50-99	White		Male	United States of America
100	543	TRUE	2021-03-05 10:29:08	51 and above	11 to 50	Less than 10	51 and above	Less than 10	Less than 10	Earth Science	Hydrology		Very familiar	Extremely familiar	Moderately well	Yes	Extremely familiar	Regularly reading a particular peer-reviewed journal (or set of journals),Peer-reviewed paper recommendations from others in my field (including via Twitter feeds),Ad-hoc through paper reviews or literature reviews for a paper I'm writing		Reading peer-reviewed papers from that discipline,Reading synthesis papers from peer-reviewed literature,Textbooks, or other education materials		Somewhat easy	Yes	Moderately familiar	Google scholar		Somewhat easy	None	None	None	Several times (x3)	A few times (x2)	Somewhat Challenging	Developing [We understand the basics, but much additional science or technique development is required to address some fundamental sources of uncertainty]	Mature [We understand the underlying mechanisms, and have adequate techniques for monitoring, but there are a few areas where improvements are needed]	Starting [We are just beginning to understand what is going on]	Within a few years	Rarely	Too many sources of information,A lack of synthesis,A lack of consensus within the science community		A lack of consensus within the science community	ACADEMIC		Early career (1 - 10 yrs)	250-499	White		Male	United States of America
100	6512	TRUE	2021-03-05 10:29:44	11 to 50	None	None	51 and above	None	Less than 10	Earth Science	Hydrology		Slightly familiar	Moderately familiar	Moderately well	Yes	Very familiar	Regularly reading a particular peer-reviewed journal (or set of journals),Peer-reviewed paper recommendations from others in my field (including via Twitter feeds),Professional conferences,Ad-hoc through paper reviews or literature reviews for a paper I'm writing		Reading peer-reviewed papers from that discipline,Reading synthesis papers from peer-reviewed literature,Contacting a colleague in that discipline,Textbooks, or other education materials		Somewhat easy	Yes	Not familiar at all	Reading peer-reviewed papers from that discipline		Somewhat difficult	1 - 3 papers per year	1 - 3 papers per year	1 - 3 papers per year	A few times (x2)	A few times (x2)	Somewhat Challenging	I do not know	Developing [We understand the basics, but much additional science or technique development is required to address some fundamental sources of uncertainty]	I do not know	I do not know	I do not know	I do not know		I do not know	ACADEMIC		Early career (1 - 10 yrs)	2021-01-04	White		Female	United States of America
100	418	TRUE	2021-03-05 10:41:11	11 to 50	Less than 10	Less than 10	51 and above	Less than 10	Less than 10	Earth Science	Hydrology		Moderately familiar	Very familiar	Poorly	Yes	Very familiar	Regularly reading a particular peer-reviewed journal (or set of journals),Peer-reviewed paper recommendations from others in my field (including via Twitter feeds),Professional conferences,Ad-hoc through paper reviews or literature reviews for a paper I'm writing,Personal communication, i.e. just talking to someone about a field,Non peer-reviewed material, i.e. news articles, websites and blogs		Reading peer-reviewed papers from that discipline,Reading synthesis papers from peer-reviewed literature,Contacting a colleague in that discipline		Easy	Yes	Slightly familiar	Reading synthesis papers from peer-reviewed literature		Neither easy nor difficult	1 - 3 papers per year	4 - 12 papers per year	4 - 12 papers per year	Several times (x3)	A few times (x2)	Challenging	I do not know	Mature [We understand the underlying mechanisms, and have adequate techniques for monitoring, but there are a few areas where improvements are needed]	Developing [We understand the basics, but fundamental sources of uncertainty remain]	I do not know	Rarely	Too many sources of information,A lack of synthesis,Other	Barriers to technology adoption	A lack of synthesis	ACADEMIC		Early career (1 - 10 yrs)	2021-01-04	White		Male	United States of America
100	400	TRUE	2021-03-05 11:41:02	11 to 50	None	Less than 10	51 and above	Less than 10	Less than 10	Earth Science	Hydrology		Very familiar	Very familiar	Moderately well	Yes	Extremely familiar	Regularly reading a particular peer-reviewed journal (or set of journals),Peer-reviewed paper recommendations from others in my field (including via Twitter feeds),Professional conferences,Ad-hoc through paper reviews or literature reviews for a paper I'm writing		Reading peer-reviewed papers from that discipline,Reading synthesis papers from peer-reviewed literature,Attend a conference,Textbooks, or other education materials		Somewhat easy	Yes	Very familiar	Reading synthesis papers from peer-reviewed literature		Somewhat easy	1 - 3 papers per year	None	1 - 3 papers per year	Once	Once	I have never needed to do this	Mature [We understand the underlying mechanisms, and have adequate techniques for monitoring, but there are a few areas where improvements are needed]	Mature [We understand the underlying mechanisms, and have adequate techniques for monitoring, but there are a few areas where improvements are needed]	Developing [We understand the basics, but fundamental sources of uncertainty remain]	>10 years	Rarely	Too many sources of information,A lack of access to information,A lack of synthesis,A lack of consensus within the science community,A lack of staff/personnel,Problems in the structure of the management agency (i.e. laws and regulations restrict the management organization or agency in using new science)		A lack of synthesis	ACADEMIC		Early career (1 - 10 yrs)	1000 or more	White		Female	United States of America
100	405	TRUE	2021-03-05 11:51:22	11 to 50	Less than 10	None	51 and above	11 to 50	11 to 50	Earth Science	Hydrology		Very familiar	Very familiar	Moderately well	Yes	Moderately familiar	Regularly reading a particular peer-reviewed journal (or set of journals),Peer-reviewed paper recommendations from others in my field (including via Twitter feeds),Professional conferences,Ad-hoc through paper reviews or literature reviews for a paper I'm writing,Personal communication, i.e. just talking to someone about a field		Reading peer-reviewed papers from that discipline		Somewhat easy	Yes	Slightly familiar	Reading synthesis papers from peer-reviewed literature		Somewhat easy	None	4 - 12 papers per year	4 - 12 papers per year	A few times (x2)	Several times (x3)	Challenging	Developing [We understand the basics, but much additional science or technique development is required to address some fundamental sources of uncertainty]	Mature [We understand the underlying mechanisms, and have adequate techniques for monitoring, but there are a few areas where improvements are needed]	Starting [We are just beginning to understand what is going on]	I do not know	I do not know	Too many sources of information,A lack of synthesis,A lack of consensus within the science community,A lack of staff/personnel,Problems in the structure of the management agency (i.e. laws and regulations restrict the management organization or agency in using new science)		A lack of staff/personnel	ACADEMIC		Mid career (10 - 20 yrs)	1000 or more	White		Female	United States of America
100	797	TRUE	2021-03-05 13:47:40	51 and above	Less than 10	Less than 10	51 and above	11 to 50	Less than 10	Earth Science	Environmental Engineering		Moderately familiar	Moderately familiar	Moderately well	Yes	Very familiar	Regularly reading a particular peer-reviewed journal (or set of journals),Peer-reviewed paper recommendations from others in my field (including via Twitter feeds),Professional conferences,Ad-hoc through paper reviews or literature reviews for a paper I'm writing,Personal communication, i.e. just talking to someone about a field		Reading peer-reviewed papers from that discipline,Reading synthesis papers from peer-reviewed literature,Wikipedia,Contacting a colleague in that discipline,Textbooks, or other education materials		Somewhat difficult	Yes	Moderately familiar	Reading peer-reviewed papers from that discipline		Somewhat difficult	1 - 3 papers per year	4 - 12 papers per year	4 - 12 papers per year	Once	A few times (x2)	Not Easy; Not Challenging	Developing [We understand the basics, but much additional science or technique development is required to address some fundamental sources of uncertainty]	Starting [We are just beginning to understand what is going on]	Starting [We are just beginning to understand what is going on]	I do not know	I do not know	Too many sources of information,Problems in the structure of the management agency (i.e. laws and regulations restrict the management organization or agency in using new science),Other	Politics.	Other	ACADEMIC		Senior (20 yrs +)	1000 or more	White		Male	United States of America
100	569	TRUE	2021-03-05 14:15:43	Less than 10	Less than 10	Less than 10	Less than 10	Less than 10	Less than 10	Life Science	Wildlife Biology		Not familiar at all	Not familiar at all	Not at all	No		Personal communication, i.e. just talking to someone about a field		Reading peer-reviewed papers from that discipline,Reading synthesis papers from peer-reviewed literature,Contacting a colleague in that discipline,Textbooks, or other education materials,A research network, i.e. the Earth Science Research Network		Somewhat easy	No		Contacting a colleague in that discipline		Somewhat easy	None	None	None	A few times (x2)	Several times (x3)	I have never needed to do this	Starting [We are just beginning to understand what is going on]	Developing [We understand the basics, but much additional science or technique development is required to address some fundamental sources of uncertainty]	Developing [We understand the basics, but fundamental sources of uncertainty remain]	>5 years	Sometimes	A lack of staff/personnel,Problems in the structure of the management agency (i.e. laws and regulations restrict the management organization or agency in using new science)		Problems in the structure of the management agency (i.e. laws and regulations restrict the management organization or agency in using new science)	ACADEMIC		Mid career (10 - 20 yrs)	2021-01-04	White		Male	United States of America
100	593	TRUE	2021-03-05 14:22:16	11 to 50	11 to 50	Less than 10	11 to 50	11 to 50	Less than 10	Life Science	Fire Ecology		Moderately familiar	Moderately familiar	Moderately well	Yes	Moderately familiar	Peer-reviewed paper recommendations from others in my field (including via Twitter feeds),Ad-hoc through paper reviews or literature reviews for a paper I'm writing		Reading peer-reviewed papers from that discipline,Reading synthesis papers from peer-reviewed literature		Somewhat difficult	Yes	Moderately familiar	Reading synthesis papers from peer-reviewed literature		Very difficult	1 - 3 papers per year	1 - 3 papers per year	4 - 12 papers per year	A few times (x2)	A few times (x2)	Challenging	Developing [We understand the basics, but much additional science or technique development is required to address some fundamental sources of uncertainty]	Developing [We understand the basics, but much additional science or technique development is required to address some fundamental sources of uncertainty]	Developing [We understand the basics, but fundamental sources of uncertainty remain]	>5 years	Sometimes	Too many sources of information,A lack of synthesis,A lack of consensus within the science community,A lack of staff/personnel,Problems in the structure of the management agency (i.e. laws and regulations restrict the management organization or agency in using new science)		A lack of consensus within the science community	ACADEMIC		Senior (20 yrs +)	1000 or more	White		Male	United States of America
100	396	TRUE	2021-03-05 14:52:54	11 to 50	Less than 10	Less than 10	51 and above	11 to 50	11 to 50	Earth Science	Fire Ecology		Moderately familiar	Moderately familiar	Moderately well	Yes	Very familiar	Regularly reading a particular peer-reviewed journal (or set of journals),Peer-reviewed paper recommendations from others in my field (including via Twitter feeds),Professional conferences,Personal communication, i.e. just talking to someone about a field,Non peer-reviewed material, i.e. news articles, websites and blogs		Reading peer-reviewed papers from that discipline,Contacting a colleague in that discipline,Attend a conference,Textbooks, or other education materials		Somewhat easy	Yes	Very familiar	Reading peer-reviewed papers from that discipline		Somewhat easy	1 - 3 papers per year	1 - 3 papers per year	None	A few times (x2)	A few times (x2)	Somewhat Easy	Mature [We understand the underlying mechanisms, and have adequate techniques for monitoring, but there are a few areas where improvements are needed]	Developing [We understand the basics, but much additional science or technique development is required to address some fundamental sources of uncertainty]	I do not know	I do not know	I do not know	A lack of synthesis,A lack of consensus within the science community		A lack of consensus within the science community	ACADEMIC		Early career (1 - 10 yrs)	20-49	White		Male	United States of America
100	653	TRUE	2021-03-05 16:15:02	11 to 50	None	None	51 and above	None	None	Earth Science	Hydrology		Moderately familiar	Very familiar	Moderately well	Yes	Very familiar	Peer-reviewed paper recommendations from others in my field (including via Twitter feeds),Professional conferences,Ad-hoc through paper reviews or literature reviews for a paper I'm writing,Personal communication, i.e. just talking to someone about a field		Reading peer-reviewed papers from that discipline,Contacting a colleague in that discipline		Easy	Yes	Slightly familiar	Google scholar		Easy	1 - 3 papers per year	1 - 3 papers per year	4 - 12 papers per year	Once	Once	Not Easy; Not Challenging	Developing [We understand the basics, but much additional science or technique development is required to address some fundamental sources of uncertainty]	Mature [We understand the underlying mechanisms, and have adequate techniques for monitoring, but there are a few areas where improvements are needed]	Starting [We are just beginning to understand what is going on]	>5 years	Sometimes	Problems in the structure of the management agency (i.e. laws and regulations restrict the management organization or agency in using new science)		Problems in the structure of the management agency (i.e. laws and regulations restrict the management organization or agency in using new science)	ACADEMIC		Mid career (10 - 20 yrs)	1000 or more	White		Male	United States of America
100	434	TRUE	2021-03-05 16:33:35	51 and above	Less than 10	Less than 10	51 and above	Less than 10	Less than 10	Earth Science	Hydrology		Moderately familiar	Moderately familiar	Poorly	Yes	Moderately familiar	Regularly reading a particular peer-reviewed journal (or set of journals),Peer-reviewed paper recommendations from others in my field (including via Twitter feeds),Ad-hoc through paper reviews or literature reviews for a paper I'm writing,Non peer-reviewed material, i.e. news articles, websites and blogs		Reading peer-reviewed papers from that discipline,Reading synthesis papers from peer-reviewed literature,Contacting a colleague in that discipline,Textbooks, or other education materials		Neither easy nor difficult	Yes	Slightly familiar	Google non-peer reviewed material		Neither easy nor difficult	None	None	None	Several times (x3)	A few times (x2)	I have never needed to do this	Mature [We understand the underlying mechanisms, and have adequate techniques for monitoring, but there are a few areas where improvements are needed]	Developing [We understand the basics, but much additional science or technique development is required to address some fundamental sources of uncertainty]	Developing [We understand the basics, but fundamental sources of uncertainty remain]	>5 years	Sometimes	Too many sources of information,A lack of access to information,A lack of synthesis,A lack of staff/personnel		A lack of synthesis	ACADEMIC		Early career (1 - 10 yrs)	1000 or more	White		Female	United States of America
100	759	TRUE	2021-03-05 17:51:46	11 to 50	Less than 10	Less than 10	11 to 50	11 to 50	11 to 50	Earth Science	Water Resource Management		Moderately familiar	Moderately familiar	Moderately well	Yes	Moderately familiar	Non peer-reviewed material, i.e. news articles, websites and blogs		A research network, i.e. the Earth Science Research Network		Easy	Yes	Moderately familiar	A research network, i.e. the Earth Science Research Network		Somewhat easy	None	None	None	Once	Once	I have never needed to do this	Mature [We understand the underlying mechanisms, and have adequate techniques for monitoring, but there are a few areas where improvements are needed]	Developing [We understand the basics, but much additional science or technique development is required to address some fundamental sources of uncertainty]	Starting [We are just beginning to understand what is going on]	Within a few years	Frequently	A lack of synthesis		A lack of synthesis	Local GOVERNMENT employee (city, county, etc.)		Senior (20 yrs +)	100-249	Prefer not to say		Female	United States of America
100	319	TRUE	2021-03-05 18:14:23	Less than 10			11 to 50			Earth Science	Hydrology		Moderately familiar	Moderately familiar	Moderately well	Yes	Moderately familiar	If "other", please tell us what you use:	just looking things up im curious about	Wikipedia		Somewhat easy	No		Wikipedia		Neither easy nor difficult	None	None	None	A few times (x2)	A few times (x2)	Somewhat Challenging	Mature [We understand the underlying mechanisms, and have adequate techniques for monitoring, but there are a few areas where improvements are needed]	Mature [We understand the underlying mechanisms, and have adequate techniques for monitoring, but there are a few areas where improvements are needed]	Mature [We understand the underlying mechanisms, but there is room for improvement]	Within a few years	Sometimes	A lack of synthesis		A lack of access to information	Federal GOVERNMENT employee		Early career (1 - 10 yrs)	20-49	White		Male	United States of America
100	355	TRUE	2021-03-05 18:49:59	11 to 50	None	11 to 50	11 to 50	None	51 and above	Social Science	Environmental Economics		Very familiar	Extremely familiar	Very well	Yes	Extremely familiar	Regularly reading a particular peer-reviewed journal (or set of journals),Peer-reviewed paper recommendations from others in my field (including via Twitter feeds),Professional conferences,Personal communication, i.e. just talking to someone about a field,Non peer-reviewed material, i.e. news articles, websites and blogs		Reading peer-reviewed papers from that discipline,Reading synthesis papers from peer-reviewed literature,Contacting a colleague in that discipline,Google non-peer reviewed material, i.e. news articles, blogs etc.,Attend a conference,Textbooks, or other education materials		Easy	Yes	Moderately familiar	Reading peer-reviewed papers from that discipline		Easy	None	None	None	Several times (x3)	Once	Somewhat Easy	Developing [We understand the basics, but much additional science or technique development is required to address some fundamental sources of uncertainty]	I do not know	Advanced [We understand the driving mechanisms and can quantify cost and risk reasonably accurately]	I do not know	Frequently	I do not know		A lack of synthesis	ACADEMIC		Early career (1 - 10 yrs)	1000 or more	White		Male	United States of America
100	546	TRUE	2021-03-05 20:07:09	51 and above	None	None	51 and above	Less than 10	None	Earth Science	Hydrology		Very familiar	Extremely familiar	Moderately well	Yes	Extremely familiar	Regularly reading a particular peer-reviewed journal (or set of journals),Peer-reviewed paper recommendations from others in my field (including via Twitter feeds),Professional conferences,Ad-hoc through paper reviews or literature reviews for a paper I'm writing,Personal communication, i.e. just talking to someone about a field		Reading peer-reviewed papers from that discipline,Reading synthesis papers from peer-reviewed literature,Attend a conference,Textbooks, or other education materials,A research network, i.e. the Earth Science Research Network		Somewhat easy	Yes	Moderately familiar	Google scholar		Somewhat difficult	1 - 3 papers per year	1 - 3 papers per year	13 - 49 papers per year	Several times (x3)	Once	I have never needed to do this	Starting [We are just beginning to understand what is going on]	Developing [We understand the basics, but much additional science or technique development is required to address some fundamental sources of uncertainty]	Developing [We understand the basics, but fundamental sources of uncertainty remain]	>10 years	Rarely	Too many sources of information,A lack of access to information,A lack of synthesis,A lack of consensus within the science community,A lack of staff/personnel,Problems in the structure of the management agency (i.e. laws and regulations restrict the management organization or agency in using new science)		A lack of staff/personnel	ACADEMIC		Mid career (10 - 20 yrs)	1000 or more	White		Female	United States of America
100	574	TRUE	2021-03-05 22:49:49	11 to 50	Less than 10	Less than 10	51 and above	11 to 50	11 to 50	Earth Science	Hydrology		Moderately familiar	Extremely familiar	Very well	Yes	Very familiar	Regularly reading a particular peer-reviewed journal (or set of journals),Professional conferences,Ad-hoc through paper reviews or literature reviews for a paper I'm writing,Personal communication, i.e. just talking to someone about a field,Non peer-reviewed material, i.e. news articles, websites and blogs		Reading peer-reviewed papers from that discipline,Wikipedia,Google non-peer reviewed material, i.e. news articles, blogs etc.,Textbooks, or other education materials,If "other", please tell us what you use:	Youtube	Neither easy nor difficult	Yes	Very familiar	Reading peer-reviewed papers from that discipline		Neither easy nor difficult	None	1 - 3 papers per year	None	A few times (x2)	Several times (x3)	Not Easy; Not Challenging	I do not know	Developing [We understand the basics, but much additional science or technique development is required to address some fundamental sources of uncertainty]	Developing [We understand the basics, but fundamental sources of uncertainty remain]	I do not know	Rarely	A lack of synthesis		A lack of synthesis	ACADEMIC		Early career (1 - 10 yrs)	1000 or more	Asian Indian		Male	United States of America
100	9416	TRUE	2021-03-05 23:00:16	11 to 50	Less than 10	None	51 and above	Less than 10	Less than 10	Earth Science	Hydrology		Moderately familiar	Very familiar	Very well	Yes	Extremely familiar	Regularly reading a particular peer-reviewed journal (or set of journals),Peer-reviewed paper recommendations from others in my field (including via Twitter feeds),Professional conferences,Ad-hoc through paper reviews or literature reviews for a paper I'm writing,Personal communication, i.e. just talking to someone about a field,Non peer-reviewed material, i.e. news articles, websites and blogs		Reading peer-reviewed papers from that discipline,Reading synthesis papers from peer-reviewed literature,Contacting a colleague in that discipline,Textbooks, or other education materials		Somewhat easy	Yes	Moderately familiar	Reading synthesis papers from peer-reviewed literature		Neither easy nor difficult	1 - 3 papers per year	1 - 3 papers per year	13 - 49 papers per year	Several times (x3)	A few times (x2)	Somewhat Challenging	Mature [We understand the underlying mechanisms, and have adequate techniques for monitoring, but there are a few areas where improvements are needed]	Developing [We understand the basics, but much additional science or technique development is required to address some fundamental sources of uncertainty]	Developing [We understand the basics, but fundamental sources of uncertainty remain]	>5 years	Rarely	Too many sources of information,A lack of synthesis,A lack of staff/personnel		A lack of staff/personnel	Federal GOVERNMENT employee		Early career (1 - 10 yrs)	250-499	White		Male	United States of America
100	774	TRUE	2021-03-06 09:37:48	11 to 50	None	None	51 and above	Less than 10	Less than 10	Earth Science	Hydrology		Extremely familiar	Extremely familiar	Moderately well	Yes	Very familiar	Peer-reviewed paper recommendations from others in my field (including via Twitter feeds)		Reading peer-reviewed papers from that discipline		Easy	Yes	Very familiar	Google scholar		Somewhat easy	1 - 3 papers per year	4 - 12 papers per year	4 - 12 papers per year	A few times (x2)	Several times (x3)	Challenging	Developing [We understand the basics, but much additional science or technique development is required to address some fundamental sources of uncertainty]	Mature [We understand the underlying mechanisms, and have adequate techniques for monitoring, but there are a few areas where improvements are needed]	Developing [We understand the basics, but fundamental sources of uncertainty remain]	I do not know	Rarely	A lack of synthesis,A lack of staff/personnel,Problems in the structure of the management agency (i.e. laws and regulations restrict the management organization or agency in using new science)		A lack of synthesis	ACADEMIC		Mid career (10 - 20 yrs)	1000 or more	White		Male	United States of America
100	2406	TRUE	2021-03-06 17:38:19	11 to 50	None	Less than 10	11 to 50	None	Less than 10	Earth Science	Hydrology		Slightly familiar	Moderately familiar	Poorly	Yes	Very familiar	Peer-reviewed paper recommendations from others in my field (including via Twitter feeds),Professional conferences,Ad-hoc through paper reviews or literature reviews for a paper I'm writing,Non peer-reviewed material, i.e. news articles, websites and blogs		Reading synthesis papers from peer-reviewed literature,Contacting a colleague in that discipline		Neither easy nor difficult	Yes	Moderately familiar	Reading synthesis papers from peer-reviewed literature		Somewhat difficult	1 - 3 papers per year	1 - 3 papers per year	4 - 12 papers per year	Many times (>4)	Many times (>4)	Challenging	Developing [We understand the basics, but much additional science or technique development is required to address some fundamental sources of uncertainty]	Developing [We understand the basics, but much additional science or technique development is required to address some fundamental sources of uncertainty]	Mature [We understand the underlying mechanisms, but there is room for improvement]	>5 years	Rarely	Other	Lack of funding (staff time, resources) to do so.	Other	ACADEMIC		Early career (1 - 10 yrs)	1000 or more	White		Female	United States of America
100	664	TRUE	2021-03-07 01:32:54	11 to 50	Less than 10	None	51 and above	11 to 50	Less than 10	Earth Science	Hydrology		Moderately familiar	Very familiar	Moderately well	Yes	Very familiar	Regularly reading a particular peer-reviewed journal (or set of journals),Professional conferences,Ad-hoc through paper reviews or literature reviews for a paper I'm writing,Personal communication, i.e. just talking to someone about a field		Reading peer-reviewed papers from that discipline,Reading synthesis papers from peer-reviewed literature,Wikipedia,Contacting a colleague in that discipline,Google non-peer reviewed material, i.e. news articles, blogs etc.,Attend a conference,Textbooks, or other education materials		Somewhat easy	No		Reading synthesis papers from peer-reviewed literature		Neither easy nor difficult	1 - 3 papers per year	1 - 3 papers per year	1 - 3 papers per year	A few times (x2)	A few times (x2)	Not Easy; Not Challenging	Mature [We understand the underlying mechanisms, and have adequate techniques for monitoring, but there are a few areas where improvements are needed]	Mature [We understand the underlying mechanisms, and have adequate techniques for monitoring, but there are a few areas where improvements are needed]	I do not know	I do not know	I do not know	I do not know		A lack of staff/personnel	ACADEMIC		Early career (1 - 10 yrs)	1000 or more	White		Male	Israel
100	4017	TRUE	2021-03-07 12:17:50	Less than 10	Less than 10	Less than 10	Less than 10	Less than 10	Less than 10	Social Science	Environmental Economics		Moderately familiar	Moderately familiar	Poorly	Yes	Very familiar	Peer-reviewed paper recommendations from others in my field (including via Twitter feeds),Professional conferences,Personal communication, i.e. just talking to someone about a field,Non peer-reviewed material, i.e. news articles, websites and blogs		Reading synthesis papers from peer-reviewed literature,Contacting a colleague in that discipline,Google non-peer reviewed material, i.e. news articles, blogs etc.,Attend a conference		Neither easy nor difficult	Yes	Moderately familiar	Google non-peer reviewed material		Neither easy nor difficult	None	1 - 3 papers per year	None	A few times (x2)	A few times (x2)	Somewhat Challenging	Developing [We understand the basics, but much additional science or technique development is required to address some fundamental sources of uncertainty]	Developing [We understand the basics, but much additional science or technique development is required to address some fundamental sources of uncertainty]	Developing [We understand the basics, but fundamental sources of uncertainty remain]	Within a few months	I do not know	Too many sources of information,A lack of synthesis,Problems in the structure of the management agency (i.e. laws and regulations restrict the management organization or agency in using new science)		A lack of synthesis	Local GOVERNMENT employee (city, county, etc.)		Early career (1 - 10 yrs)	1000 or more	White		Female	United States of America
100	470	TRUE	2021-03-07 16:20:14	Less than 10	Less than 10	Less than 10	Less than 10	Less than 10	11 to 50	Life Science	Natural Resource Management		Slightly familiar	Slightly familiar	Moderately well	No		Peer-reviewed paper recommendations from others in my field (including via Twitter feeds),Professional conferences,Personal communication, i.e. just talking to someone about a field		Reading synthesis papers from peer-reviewed literature,Contacting a colleague in that discipline,Attend a conference		Somewhat easy	Yes	Slightly familiar	Contacting a colleague in that discipline		Somewhat easy	None	None	None	Several times (x3)	Several times (x3)	I have never needed to do this	Developing [We understand the basics, but much additional science or technique development is required to address some fundamental sources of uncertainty]	Developing [We understand the basics, but much additional science or technique development is required to address some fundamental sources of uncertainty]	Developing [We understand the basics, but fundamental sources of uncertainty remain]	Within a few years	Sometimes	A lack of synthesis,A lack of staff/personnel,Problems in the structure of the management agency (i.e. laws and regulations restrict the management organization or agency in using new science)		A lack of staff/personnel	Federal GOVERNMENT employee		Senior (20 yrs +)	250-499	Chinese		Male	United States of America
100	484	TRUE	2021-03-07 16:29:02	Less than 10	11 to 50	None	Less than 10	11 to 50	Less than 10	Life Science	Plant Ecology		Moderately familiar	Moderately familiar	Moderately well	Yes	Very familiar	Peer-reviewed paper recommendations from others in my field (including via Twitter feeds),Professional conferences,Ad-hoc through paper reviews or literature reviews for a paper I'm writing,Personal communication, i.e. just talking to someone about a field		Reading peer-reviewed papers from that discipline,Reading synthesis papers from peer-reviewed literature,Contacting a colleague in that discipline,Textbooks, or other education materials		Neither easy nor difficult	Yes	Moderately familiar	Reading peer-reviewed papers from that discipline		Neither easy nor difficult	None	None	None	A few times (x2)	A few times (x2)	Somewhat Challenging	Mature [We understand the underlying mechanisms, and have adequate techniques for monitoring, but there are a few areas where improvements are needed]	Mature [We understand the underlying mechanisms, and have adequate techniques for monitoring, but there are a few areas where improvements are needed]	Advanced [We understand the driving mechanisms and can quantify cost and risk reasonably accurately]	>5 years	Rarely	A lack of synthesis,Problems in the structure of the management agency (i.e. laws and regulations restrict the management organization or agency in using new science)		Problems in the structure of the management agency (i.e. laws and regulations restrict the management organization or agency in using new science)	ACADEMIC		Early career (1 - 10 yrs)	1000 or more	White		Female	United States of America
100	431	TRUE	2021-03-08 10:33:46	51 and above	11 to 50	None	51 and above	11 to 50	Less than 10	Earth Science	Hydrology		Moderately familiar	Very familiar	Moderately well	Yes	Extremely familiar	Ad-hoc through paper reviews or literature reviews for a paper I'm writing		Reading peer-reviewed papers from that discipline		Neither easy nor difficult	Yes	Moderately familiar	Reading synthesis papers from peer-reviewed literature		Neither easy nor difficult	1 - 3 papers per year	1 - 3 papers per year	1 - 3 papers per year	Several times (x3)	Several times (x3)	Challenging	Mature [We understand the underlying mechanisms, and have adequate techniques for monitoring, but there are a few areas where improvements are needed]	Developing [We understand the basics, but much additional science or technique development is required to address some fundamental sources of uncertainty]	Mature [We understand the underlying mechanisms, but there is room for improvement]	>5 years	Sometimes	A lack of access to information,A lack of synthesis,A lack of consensus within the science community,A lack of staff/personnel,Problems in the structure of the management agency (i.e. laws and regulations restrict the management organization or agency in using new science)		A lack of staff/personnel	ACADEMIC		Early career (1 - 10 yrs)	500-999	White		Female	United States of America
100	676	TRUE	2021-03-08 11:00:19	Less than 10			Less than 10			Earth Science	Natural Resource Management		Not familiar at all	Slightly familiar	Moderately well	Yes	Moderately familiar	Peer-reviewed paper recommendations from others in my field (including via Twitter feeds),Personal communication, i.e. just talking to someone about a field,Non peer-reviewed material, i.e. news articles, websites and blogs		Reading peer-reviewed papers from that discipline,Contacting a colleague in that discipline		Easy	No		Contacting a colleague in that discipline			None	None	None	Many times (>4)	Many times (>4)	I have never needed to do this	I do not know					Too many sources of information,A lack of access to information,A lack of synthesis		A lack of synthesis	Federal GOVERNMENT employee		Mid career (10 - 20 yrs)	250-499	White		Female	United States of America
100	453	TRUE	2021-03-08 13:06:25	Less than 10	Less than 10	11 to 50	11 to 50	11 to 50	51 and above	Social Science	Environmental Politics and Policy		Very familiar	Very familiar	Moderately well	Yes	Very familiar	Professional conferences,Ad-hoc through paper reviews or literature reviews for a paper I'm writing		Reading peer-reviewed papers from that discipline,Reading synthesis papers from peer-reviewed literature		Easy	No		Contacting a colleague in that discipline		Somewhat difficult	1 - 3 papers per year	1 - 3 papers per year	13 - 49 papers per year	Once	Once	Challenging	Developing [We understand the basics, but much additional science or technique development is required to address some fundamental sources of uncertainty]	Mature [We understand the underlying mechanisms, and have adequate techniques for monitoring, but there are a few areas where improvements are needed]	Developing [We understand the basics, but fundamental sources of uncertainty remain]	Within a few years	Frequently	Too many sources of information,A lack of synthesis,A lack of consensus within the science community		Too many sources of information	ACADEMIC		Mid career (10 - 20 yrs)	1000 or more	White		Female	United States of America
100	424	TRUE	2021-03-08 14:54:14	11 to 50	Less than 10	Less than 10	11 to 50	11 to 50	Less than 10	Earth Science	Hydrology		Moderately familiar	Very familiar	Moderately well	Yes	Very familiar	Peer-reviewed paper recommendations from others in my field (including via Twitter feeds),Professional conferences,Ad-hoc through paper reviews or literature reviews for a paper I'm writing		Reading peer-reviewed papers from that discipline,Reading synthesis papers from peer-reviewed literature,Attend a conference		Somewhat easy	Yes	Slightly familiar	Reading synthesis papers from peer-reviewed literature		Somewhat difficult	1 - 3 papers per year	1 - 3 papers per year	13 - 49 papers per year	A few times (x2)	Once	Challenging	I do not know	Developing [We understand the basics, but much additional science or technique development is required to address some fundamental sources of uncertainty]	I do not know	>5 years	Sometimes	A lack of access to information,A lack of staff/personnel,Problems in the structure of the management agency (i.e. laws and regulations restrict the management organization or agency in using new science),Other	A lack of incentive to do so	I do not know	ACADEMIC		Mid career (10 - 20 yrs)	1000 or more	White		Female	United States of America
100	628	TRUE	2021-03-08 15:32:09	Less than 10	None	11 to 50	Less than 10	None	51 and above	Social Science	Natural Resource Management		Moderately familiar	Moderately familiar	Poorly	Yes	Very familiar	Peer-reviewed paper recommendations from others in my field (including via Twitter feeds),Professional conferences,Ad-hoc through paper reviews or literature reviews for a paper I'm writing,Non peer-reviewed material, i.e. news articles, websites and blogs				Neither easy nor difficult	Yes	Moderately familiar	Google scholar		Neither easy nor difficult	1 - 3 papers per year	1 - 3 papers per year	1 - 3 papers per year	Once	Once	Somewhat Easy	Mature [We understand the underlying mechanisms, and have adequate techniques for monitoring, but there are a few areas where improvements are needed]	Mature [We understand the underlying mechanisms, and have adequate techniques for monitoring, but there are a few areas where improvements are needed]	Mature [We understand the underlying mechanisms, but there is room for improvement]	>5 years	Sometimes	A lack of access to information,A lack of synthesis,A lack of staff/personnel,Problems in the structure of the management agency (i.e. laws and regulations restrict the management organization or agency in using new science)		Problems in the structure of the management agency (i.e. laws and regulations restrict the management organization or agency in using new science)	ACADEMIC		Early career (1 - 10 yrs)	1000 or more	White		Male	United States of America
100	515	TRUE	2021-03-08 15:59:33	Less than 10	None	None	11 to 50	Less than 10	None	Earth Science	Meteorology/Climatology		Slightly familiar	Moderately familiar	Moderately well	Yes	Very familiar	Personal communication, i.e. just talking to someone about a field		Reading peer-reviewed papers from that discipline		Easy	Yes	Very familiar	Reading peer-reviewed papers from that discipline		Easy	1 - 3 papers per year	1 - 3 papers per year	1 - 3 papers per year	Many times (>4)	Many times (>4)	Somewhat Challenging	Mature [We understand the underlying mechanisms, and have adequate techniques for monitoring, but there are a few areas where improvements are needed]	Developing [We understand the basics, but much additional science or technique development is required to address some fundamental sources of uncertainty]	Starting [We are just beginning to understand what is going on]	Within a few years	Sometimes	A lack of staff/personnel		A lack of staff/personnel	PRIVATE-NOT-FOR-PROFIT, tax-exempt, charitable organization		Mid career (10 - 20 yrs)	1000 or more	White		Male	United States of America
100	518	TRUE	2021-03-08 16:17:54	Less than 10	Less than 10	Less than 10	11 to 50	11 to 50	Less than 10	Life Science	Natural Resource Management		Slightly familiar	Slightly familiar	Moderately well	Yes	Slightly familiar	Peer-reviewed paper recommendations from others in my field (including via Twitter feeds),Professional conferences,Ad-hoc through paper reviews or literature reviews for a paper I'm writing,Personal communication, i.e. just talking to someone about a field,Non peer-reviewed material, i.e. news articles, websites and blogs		Reading peer-reviewed papers from that discipline,Reading synthesis papers from peer-reviewed literature,Wikipedia,Contacting a colleague in that discipline,Google non-peer reviewed material, i.e. news articles, blogs etc.,A research network, i.e. the Earth Science Research Network		Neither easy nor difficult	Yes	Slightly familiar	Contacting a colleague in that discipline		Somewhat difficult	None	None	None	Several times (x3)	Several times (x3)	I have never needed to do this	Developing [We understand the basics, but much additional science or technique development is required to address some fundamental sources of uncertainty]	Developing [We understand the basics, but much additional science or technique development is required to address some fundamental sources of uncertainty]	Developing [We understand the basics, but fundamental sources of uncertainty remain]	>5 years	Rarely	Too many sources of information,A lack of synthesis,A lack of staff/personnel,Problems in the structure of the management agency (i.e. laws and regulations restrict the management organization or agency in using new science)		A lack of staff/personnel	ACADEMIC		Early career (1 - 10 yrs)	1000 or more	White		Female	United States of America
100	335	TRUE	2021-03-08 17:40:54	11 to 50	Less than 10	Less than 10	11 to 50	11 to 50	Less than 10	Earth Science	Fire Ecology		Very familiar	Very familiar	Very well	Yes	Extremely familiar	Regularly reading a particular peer-reviewed journal (or set of journals)		Reading peer-reviewed papers from that discipline,Contacting a colleague in that discipline,A research network, i.e. the Earth Science Research Network		Somewhat easy	Yes	Very familiar	Reading peer-reviewed papers from that discipline		Somewhat easy	None	1 - 3 papers per year	None	Several times (x3)	A few times (x2)	Somewhat Challenging	Mature [We understand the underlying mechanisms, and have adequate techniques for monitoring, but there are a few areas where improvements are needed]	Mature [We understand the underlying mechanisms, and have adequate techniques for monitoring, but there are a few areas where improvements are needed]	Mature [We understand the underlying mechanisms, but there is room for improvement]	Within a few years	Frequently	Too many sources of information,A lack of access to information,A lack of staff/personnel,Problems in the structure of the management agency (i.e. laws and regulations restrict the management organization or agency in using new science)		Problems in the structure of the management agency (i.e. laws and regulations restrict the management organization or agency in using new science)	ACADEMIC		Early career (1 - 10 yrs)	2021-05-09	White		Female	United States of America
100	526	TRUE	2021-03-08 17:47:04	None	Less than 10	None	None	Less than 10	None	Life Science	Wildlife Biology		Not familiar at all	Not familiar at all	Poorly	Yes	Not familiar at all	Personal communication, i.e. just talking to someone about a field,Non peer-reviewed material, i.e. news articles, websites and blogs		Reading peer-reviewed papers from that discipline,Contacting a colleague in that discipline			No		Contacting a colleague in that discipline			None	None	None			I have never needed to do this	I do not know	I do not know	I do not know	I do not know	I do not know	I do not know		I do not know	Federal GOVERNMENT employee		Mid career (10 - 20 yrs)	100-249	White		Female	United States of America
100	461	TRUE	2021-03-08 22:14:10	Less than 10	Less than 10	None	Less than 10	11 to 50	Less than 10	Life Science	Environmental Toxicology		Moderately familiar	Very familiar	Moderately well	Yes	Very familiar	Regularly reading a particular peer-reviewed journal (or set of journals),Professional conferences,Ad-hoc through paper reviews or literature reviews for a paper I'm writing,Personal communication, i.e. just talking to someone about a field		Reading peer-reviewed papers from that discipline,Reading synthesis papers from peer-reviewed literature,Contacting a colleague in that discipline,Attend a conference,Textbooks, or other education materials,A research network, i.e. the Earth Science Research Network		Easy	Yes	Moderately familiar	Reading peer-reviewed papers from that discipline		Easy	1 - 3 papers per year	1 - 3 papers per year	4 - 12 papers per year	A few times (x2)	A few times (x2)	Challenging	Developing [We understand the basics, but much additional science or technique development is required to address some fundamental sources of uncertainty]	Mature [We understand the underlying mechanisms, and have adequate techniques for monitoring, but there are a few areas where improvements are needed]	Developing [We understand the basics, but fundamental sources of uncertainty remain]	>5 years	Sometimes	Too many sources of information,A lack of access to information,A lack of synthesis,A lack of staff/personnel,Problems in the structure of the management agency (i.e. laws and regulations restrict the management organization or agency in using new science)		A lack of synthesis	Federal GOVERNMENT employee		Mid career (10 - 20 yrs)	50-99	White		Male	United States of America
100	511	TRUE	2021-03-09 01:02:18	11 to 50	None	None	51 and above	None	None	Earth Science	Hydrology		Moderately familiar	Moderately familiar	Moderately well	Yes	Very familiar	Peer-reviewed paper recommendations from others in my field (including via Twitter feeds),Professional conferences,Ad-hoc through paper reviews or literature reviews for a paper I'm writing,Personal communication, i.e. just talking to someone about a field,Non peer-reviewed material, i.e. news articles, websites and blogs		Reading peer-reviewed papers from that discipline,Reading synthesis papers from peer-reviewed literature,Wikipedia,Contacting a colleague in that discipline,Google non-peer reviewed material, i.e. news articles, blogs etc.,Attend a conference,Textbooks, or other education materials,A research network, i.e. the Earth Science Research Network		Easy	Yes	Very familiar	Reading peer-reviewed papers from that discipline		Easy	1 - 3 papers per year	None	1 - 3 papers per year	Several times (x3)	A few times (x2)	I have never needed to do this	I do not know	Developing [We understand the basics, but much additional science or technique development is required to address some fundamental sources of uncertainty]	Developing [We understand the basics, but fundamental sources of uncertainty remain]	I do not know	I do not know	I do not know		A lack of consensus within the science community	ACADEMIC		Early career (1 - 10 yrs)	100-249	White		Male	United States of America
100	412	TRUE	2021-03-09 08:56:14	Less than 10	None	None	11 to 50	None	None	Earth Science	Hydrology		Moderately familiar	Moderately familiar	Moderately well	Yes	Not familiar at all	Regularly reading a particular peer-reviewed journal (or set of journals),Peer-reviewed paper recommendations from others in my field (including via Twitter feeds),Professional conferences,Ad-hoc through paper reviews or literature reviews for a paper I'm writing,Personal communication, i.e. just talking to someone about a field,Non peer-reviewed material, i.e. news articles, websites and blogs		Reading peer-reviewed papers from that discipline,Reading synthesis papers from peer-reviewed literature,Attend a conference		Neither easy nor difficult	Yes	Moderately familiar	Attend a conference		Neither easy nor difficult	None	1 - 3 papers per year	1 - 3 papers per year	A few times (x2)	A few times (x2)	Not Easy; Not Challenging	Developing [We understand the basics, but much additional science or technique development is required to address some fundamental sources of uncertainty]	Developing [We understand the basics, but much additional science or technique development is required to address some fundamental sources of uncertainty]	Developing [We understand the basics, but fundamental sources of uncertainty remain]	Within a few years	Sometimes	A lack of staff/personnel		Problems in the structure of the management agency (i.e. laws and regulations restrict the management organization or agency in using new science)	ACADEMIC		Mid career (10 - 20 yrs)	250-499	White		Male	United States of America
100	732	TRUE	2021-03-09 10:13:57	11 to 50	11 to 50	11 to 50	51 and above	51 and above	51 and above	Earth Science	Geology & Geophysics		Extremely familiar	Extremely familiar	Very well	Yes	Extremely familiar	Peer-reviewed paper recommendations from others in my field (including via Twitter feeds)		Google non-peer reviewed material, i.e. news articles, blogs etc.		Easy	Yes	Extremely familiar	Google scholar		Easy	1 - 3 papers per year	None	4 - 12 papers per year	Several times (x3)	A few times (x2)	Not Easy; Not Challenging	Advanced [We can quantify the uncertainty and know the driving mechanisms]	Advanced [We can quantify the uncertainty and know the driving mechanisms]	Advanced [We understand the driving mechanisms and can quantify cost and risk reasonably accurately]	>10 years	I do not know	A lack of staff/personnel,Problems in the structure of the management agency (i.e. laws and regulations restrict the management organization or agency in using new science),I do not know		A lack of staff/personnel	ACADEMIC		Mid career (10 - 20 yrs)	1000 or more	White		Female	United States of America
100	475	TRUE	2021-03-09 10:39:58	11 to 50	Less than 10	None	51 and above	11 to 50	None	Earth Science	Hydrology		Moderately familiar	Very familiar	Moderately well	Yes	Extremely familiar	Peer-reviewed paper recommendations from others in my field (including via Twitter feeds),Professional conferences,Ad-hoc through paper reviews or literature reviews for a paper I'm writing		Reading peer-reviewed papers from that discipline,Reading synthesis papers from peer-reviewed literature,Attend a conference		Neither easy nor difficult	Yes	Moderately familiar	Reading peer-reviewed papers from that discipline		Neither easy nor difficult	1 - 3 papers per year	1 - 3 papers per year	4 - 12 papers per year	Many times (>4)	A few times (x2)	Not Easy; Not Challenging	Mature [We understand the underlying mechanisms, and have adequate techniques for monitoring, but there are a few areas where improvements are needed]	Mature [We understand the underlying mechanisms, and have adequate techniques for monitoring, but there are a few areas where improvements are needed]	Mature [We understand the underlying mechanisms, but there is room for improvement]	>5 years	Rarely	Too many sources of information,A lack of staff/personnel,Problems in the structure of the management agency (i.e. laws and regulations restrict the management organization or agency in using new science),I do not know		Too many sources of information	ACADEMIC		Early career (1 - 10 yrs)	1000 or more	White		Male	United States of America
100	706	TRUE	2021-03-09 11:05:22	Less than 10	11 to 50	Less than 10	11 to 50	51 and above	Less than 10	Life Science	Plant Ecology		Moderately familiar	Very familiar	Moderately well	Yes	Extremely familiar	Regularly reading a particular peer-reviewed journal (or set of journals),Peer-reviewed paper recommendations from others in my field (including via Twitter feeds),Professional conferences,Ad-hoc through paper reviews or literature reviews for a paper I'm writing,Personal communication, i.e. just talking to someone about a field,Non peer-reviewed material, i.e. news articles, websites and blogs		Reading peer-reviewed papers from that discipline,Contacting a colleague in that discipline,Attend a conference		Somewhat difficult	Yes	Very familiar	Reading peer-reviewed papers from that discipline		Somewhat difficult	4 - 12 papers per year	4 - 12 papers per year	13 - 49 papers per year	A few times (x2)	A few times (x2)	Somewhat Challenging	Starting [We are just beginning to understand what is going on]	Starting [We are just beginning to understand what is going on]	Starting [We are just beginning to understand what is going on]	Within a few years	Rarely	A lack of access to information,A lack of synthesis,A lack of staff/personnel,Problems in the structure of the management agency (i.e. laws and regulations restrict the management organization or agency in using new science)		A lack of staff/personnel	ACADEMIC		Senior (20 yrs +)	100-249	White		Male	United States of America
100	6410	TRUE	2021-03-09 12:13:47	11 to 50	None	Less than 10	51 and above	Less than 10	Less than 10	Earth Science	Hydrology		Moderately familiar	Moderately familiar	Moderately well	Yes	Very familiar	Regularly reading a particular peer-reviewed journal (or set of journals),Peer-reviewed paper recommendations from others in my field (including via Twitter feeds),Professional conferences,Ad-hoc through paper reviews or literature reviews for a paper I'm writing,Personal communication, i.e. just talking to someone about a field		Reading peer-reviewed papers from that discipline,Reading synthesis papers from peer-reviewed literature,Contacting a colleague in that discipline,Attend a conference		Somewhat easy	Yes	Slightly familiar	Contacting a colleague in that discipline		Somewhat easy	1 - 3 papers per year	4 - 12 papers per year	4 - 12 papers per year	Several times (x3)	Once	Somewhat Challenging	I do not know	Developing [We understand the basics, but much additional science or technique development is required to address some fundamental sources of uncertainty]	I do not know	I do not know	I do not know	I do not know		A lack of synthesis	ACADEMIC		Mid career (10 - 20 yrs)	1000 or more	Other (please specify)		Female	United States of America
100	417	TRUE	2021-03-09 15:11:11	Less than 10	11 to 50	None	Less than 10	51 and above	None	Life Science	Fire Ecology		Very familiar	Extremely familiar	Moderately well	No		Regularly reading a particular peer-reviewed journal (or set of journals),Peer-reviewed paper recommendations from others in my field (including via Twitter feeds),Ad-hoc through paper reviews or literature reviews for a paper I'm writing		Reading peer-reviewed papers from that discipline,Reading synthesis papers from peer-reviewed literature,Contacting a colleague in that discipline		Somewhat easy	Yes	Very familiar	Reading synthesis papers from peer-reviewed literature		Neither easy nor difficult	1 - 3 papers per year	4 - 12 papers per year	4 - 12 papers per year	A few times (x2)	Several times (x3)	I have never needed to do this	Mature [We understand the underlying mechanisms, and have adequate techniques for monitoring, but there are a few areas where improvements are needed]	Developing [We understand the basics, but much additional science or technique development is required to address some fundamental sources of uncertainty]	Mature [We understand the underlying mechanisms, but there is room for improvement]	>5 years	Sometimes	A lack of synthesis		A lack of consensus within the science community	Federal GOVERNMENT employee		Senior (20 yrs +)	1000 or more	White		Male	United States of America
100	564	TRUE	2021-03-09 15:38:40	Less than 10	None	None	11 to 50	None	Less than 10	Earth Science	Hydrology		Moderately familiar	Moderately familiar	Moderately well	Yes	Very familiar	Peer-reviewed paper recommendations from others in my field (including via Twitter feeds),Professional conferences,Ad-hoc through paper reviews or literature reviews for a paper I'm writing,Personal communication, i.e. just talking to someone about a field		Reading peer-reviewed papers from that discipline,Reading synthesis papers from peer-reviewed literature,Wikipedia,Contacting a colleague in that discipline,Textbooks, or other education materials		Somewhat easy	Yes	Slightly familiar	Google non-peer reviewed material		Somewhat difficult	1 - 3 papers per year	1 - 3 papers per year	1 - 3 papers per year	A few times (x2)	A few times (x2)	I have never needed to do this	Mature [We understand the underlying mechanisms, and have adequate techniques for monitoring, but there are a few areas where improvements are needed]	Developing [We understand the basics, but much additional science or technique development is required to address some fundamental sources of uncertainty]	I do not know	Within a few years	Rarely	Too many sources of information,A lack of access to information,A lack of consensus within the science community,Problems in the structure of the management agency (i.e. laws and regulations restrict the management organization or agency in using new science)		Too many sources of information	Federal GOVERNMENT employee		Early career (1 - 10 yrs)	1000 or more	White		Female	United States of America
100	891	TRUE	2021-03-09 16:38:24	Less than 10	Less than 10	None	Less than 10	11 to 50	None	Life Science	Other	Landscape ecology	Moderately familiar	Moderately familiar	Moderately well	No		Regularly reading a particular peer-reviewed journal (or set of journals),Peer-reviewed paper recommendations from others in my field (including via Twitter feeds),Professional conferences,Ad-hoc through paper reviews or literature reviews for a paper I'm writing,Personal communication, i.e. just talking to someone about a field,Non peer-reviewed material, i.e. news articles, websites and blogs		Reading peer-reviewed papers from that discipline,Reading synthesis papers from peer-reviewed literature,Contacting a colleague in that discipline,Attend a conference		Somewhat easy	Yes	Moderately familiar	Reading synthesis papers from peer-reviewed literature		Somewhat easy	1 - 3 papers per year	4 - 12 papers per year	4 - 12 papers per year	A few times (x2)	A few times (x2)	Challenging	Mature [We understand the underlying mechanisms, and have adequate techniques for monitoring, but there are a few areas where improvements are needed]	Mature [We understand the underlying mechanisms, and have adequate techniques for monitoring, but there are a few areas where improvements are needed]	I do not know	I do not know	Frequently	Too many sources of information,A lack of access to information,A lack of synthesis,A lack of consensus within the science community,A lack of staff/personnel,Problems in the structure of the management agency (i.e. laws and regulations restrict the management organization or agency in using new science)		A lack of synthesis	ACADEMIC		Early career (1 - 10 yrs)	1000 or more	Other (please specify)	mixed	Male	United States of America
100	546	TRUE	2021-03-09 17:31:20	Less than 10	51 and above	None	11 to 50	51 and above	Less than 10	Life Science	Other	Community Ecology	Extremely familiar	Extremely familiar	Very well	Yes	Extremely familiar	Regularly reading a particular peer-reviewed journal (or set of journals),Peer-reviewed paper recommendations from others in my field (including via Twitter feeds),Professional conferences,Ad-hoc through paper reviews or literature reviews for a paper I'm writing,Personal communication, i.e. just talking to someone about a field		Reading peer-reviewed papers from that discipline,Reading synthesis papers from peer-reviewed literature,Contacting a colleague in that discipline,A research network, i.e. the Earth Science Research Network		Somewhat difficult	No		Reading peer-reviewed papers from that discipline		Somewhat difficult	1 - 3 papers per year	1 - 3 papers per year	1 - 3 papers per year	Several times (x3)	A few times (x2)	Challenging	Mature [We understand the underlying mechanisms, and have adequate techniques for monitoring, but there are a few areas where improvements are needed]	Developing [We understand the basics, but much additional science or technique development is required to address some fundamental sources of uncertainty]	Developing [We understand the basics, but fundamental sources of uncertainty remain]	>10 years	Sometimes	A lack of access to information,A lack of synthesis,A lack of consensus within the science community,A lack of staff/personnel,Problems in the structure of the management agency (i.e. laws and regulations restrict the management organization or agency in using new science)		A lack of staff/personnel	ACADEMIC		Early career (1 - 10 yrs)	1000 or more	White		Female	United States of America
100	619	TRUE	2021-03-09 20:06:51	Less than 10	Less than 10	None	None	None	None	Earth Science	Natural Resource Management		I do not have access to the literature	Slightly familiar	Moderately well	Yes	Not familiar at all	Professional conferences,Personal communication, i.e. just talking to someone about a field,If "other", please tell us what you use:	reports from studies/projects that have been completed	Contacting a colleague in that discipline,Attend a conference,If "other", please tell us what you use:	reports from studies/projects that have been completed; my own experience in the field	Somewhat difficult	Yes	I do not have access to the literature	If "other", please tell us what you use:	reports from studies/projects that have been completed	Somewhat difficult	None	None	1 - 3 papers per year	Once	Once	I have never needed to do this	I do not know	I do not know	I do not know	>10 years	I do not know	A lack of access to information,Other	researchers study topics that are not germane to on-the-ground work; local governments do not have access to peer reviewed literature services, so we only use papers that are published from work we or our neighboring agencies pay for and thus receive the articles directly from the researchers we funded	A lack of access to information	Local GOVERNMENT employee (city, county, etc.)		Mid career (10 - 20 yrs)	2021-05-09	White		Female	United States of America
100	358	TRUE	2021-03-09 21:35:04	11 to 50	11 to 50	Less than 10	11 to 50	51 and above	11 to 50	Life Science	Other	community ecology	Extremely familiar	Very familiar	Moderately well	Yes	Very familiar	Peer-reviewed paper recommendations from others in my field (including via Twitter feeds),Professional conferences,Ad-hoc through paper reviews or literature reviews for a paper I'm writing,Personal communication, i.e. just talking to someone about a field,Non peer-reviewed material, i.e. news articles, websites and blogs		Reading peer-reviewed papers from that discipline,Reading synthesis papers from peer-reviewed literature,A research network, i.e. the Earth Science Research Network		Somewhat easy	Yes	Very familiar	Reading synthesis papers from peer-reviewed literature		Neither easy nor difficult	1 - 3 papers per year	1 - 3 papers per year	1 - 3 papers per year	Several times (x3)	Several times (x3)	Somewhat Challenging	I do not know	Advanced [We can quantify the uncertainty and know the driving mechanisms]	Advanced [We understand the driving mechanisms and can quantify cost and risk reasonably accurately]	>5 years	I do not know	A lack of synthesis,A lack of staff/personnel		A lack of staff/personnel	ACADEMIC		Early career (1 - 10 yrs)	1000 or more	White		Female	United States of America
100	1550	TRUE	2021-03-09 21:51:53	Less than 10	Less than 10	Less than 10	11 to 50	11 to 50	Less than 10	Life Science	Natural Resource Management		I do not have access to the literature	I do not have access to the literature	Moderately well	Yes	Moderately familiar	Ad-hoc through paper reviews or literature reviews for a paper I'm writing,Personal communication, i.e. just talking to someone about a field,Non peer-reviewed material, i.e. news articles, websites and blogs		Reading synthesis papers from peer-reviewed literature,Wikipedia,Contacting a colleague in that discipline,Attend a conference,Textbooks, or other education materials		Somewhat difficult	Yes	Moderately familiar	Wikipedia		Somewhat difficult	None	1 - 3 papers per year	None	I do not read the peer-reviewed literature	I do not read the peer-reviewed literature	I have never needed to do this	Developing [We understand the basics, but much additional science or technique development is required to address some fundamental sources of uncertainty]	I do not know	Starting [We are just beginning to understand what is going on]	>10 years	I do not know	A lack of access to information,A lack of staff/personnel,Problems in the structure of the management agency (i.e. laws and regulations restrict the management organization or agency in using new science)		A lack of access to information	PRIVATE-NOT-FOR-PROFIT, tax-exempt, charitable organization		Senior (20 yrs +)	20-49	Other (please specify)	human	Male	United States of America
100	976	TRUE	2021-03-09 22:09:19	None	None	Less than 10	11 to 50	11 to 50	Less than 10	Earth Science	Natural Resource Management		I do not have access to the literature	I do not have access to the literature	Moderately well	Yes	I do not have access to the literature	Professional conferences,Ad-hoc through paper reviews or literature reviews for a paper I'm writing,Personal communication, i.e. just talking to someone about a field,Non peer-reviewed material, i.e. news articles, websites and blogs		Wikipedia,Contacting a colleague in that discipline,Google non-peer reviewed material, i.e. news articles, blogs etc.,Attend a conference,Textbooks, or other education materials		Very difficult	Yes	I do not have access to the literature	Wikipedia		Somewhat difficult	None	None	None	I do not read the peer-reviewed literature	I do not read the peer-reviewed literature	I have never needed to do this	Developing [We understand the basics, but much additional science or technique development is required to address some fundamental sources of uncertainty]	I do not know	I do not know	>10 years	I do not know	A lack of access to information,A lack of synthesis,A lack of staff/personnel,Problems in the structure of the management agency (i.e. laws and regulations restrict the management organization or agency in using new science)		A lack of access to information	PRIVATE-NOT-FOR-PROFIT, tax-exempt, charitable organization		Mid career (10 - 20 yrs)	2021-10-19	White		Male	United States of America
100	765	TRUE	2021-03-10 08:09:49	None	None	None	Less than 10	Less than 10	None	Earth Science	Water Resource Management		I do not have access to the literature	I do not have access to the literature	Poorly	Yes	Slightly familiar	Non peer-reviewed material, i.e. news articles, websites and blogs		Reading peer-reviewed papers from that discipline,Reading synthesis papers from peer-reviewed literature,Wikipedia,Contacting a colleague in that discipline,Google non-peer reviewed material, i.e. news articles, blogs etc.		Neither easy nor difficult	No		Google non-peer reviewed material		Neither easy nor difficult	None	None	None	Several times (x3)	Several times (x3)	I have never needed to do this	I do not know	Mature [We understand the underlying mechanisms, and have adequate techniques for monitoring, but there are a few areas where improvements are needed]	Mature [We understand the underlying mechanisms, but there is room for improvement]	Within a few years	Sometimes	A lack of access to information,A lack of staff/personnel,Problems in the structure of the management agency (i.e. laws and regulations restrict the management organization or agency in using new science),Other	Shifting the course/patterns/inertia of of bureaucracy is slow!	Other	Local GOVERNMENT employee (city, county, etc.)		Mid career (10 - 20 yrs)	1000 or more	White		Female	United States of America
100	737	TRUE	2021-03-10 08:27:10	Less than 10			11 to 50			Earth Science	Natural Resource Management		Slightly familiar	Moderately familiar	Poorly	Yes	Moderately familiar	Peer-reviewed paper recommendations from others in my field (including via Twitter feeds),Professional conferences,Ad-hoc through paper reviews or literature reviews for a paper I'm writing,Personal communication, i.e. just talking to someone about a field,Non peer-reviewed material, i.e. news articles, websites and blogs		Reading peer-reviewed papers from that discipline,Reading synthesis papers from peer-reviewed literature,Wikipedia,Google non-peer reviewed material, i.e. news articles, blogs etc.		Somewhat easy	Yes	Slightly familiar	Google scholar		Somewhat easy	None	1 - 3 papers per year	None	Several times (x3)	Several times (x3)	Somewhat Challenging	Mature [We understand the underlying mechanisms, and have adequate techniques for monitoring, but there are a few areas where improvements are needed]	Developing [We understand the basics, but much additional science or technique development is required to address some fundamental sources of uncertainty]	Developing [We understand the basics, but fundamental sources of uncertainty remain]	>5 years	Sometimes	A lack of access to information,A lack of synthesis,A lack of staff/personnel		Problems in the structure of the management agency (i.e. laws and regulations restrict the management organization or agency in using new science)	PRIVATE-NOT-FOR-PROFIT, tax-exempt, charitable organization		Mid career (10 - 20 yrs)	1000 or more	Other (please specify)	Race is not an actual thing, you are asking for country origin.	Male	United States of America
100	459	TRUE	2021-03-10 09:24:58	Less than 10	Less than 10	None	11 to 50	11 to 50	None	Earth Science	Wildlife Biology		Moderately familiar	Very familiar	Moderately well	Yes	Very familiar	Peer-reviewed paper recommendations from others in my field (including via Twitter feeds),Professional conferences,Personal communication, i.e. just talking to someone about a field,Non peer-reviewed material, i.e. news articles, websites and blogs		Reading peer-reviewed papers from that discipline,Contacting a colleague in that discipline,Google non-peer reviewed material, i.e. news articles, blogs etc.,Attend a conference,Textbooks, or other education materials,A research network, i.e. the Earth Science Research Network		Somewhat easy	Yes	Moderately familiar	Google non-peer reviewed material		Somewhat easy	None	None	None	A few times (x2)	A few times (x2)	I have never needed to do this	Developing [We understand the basics, but much additional science or technique development is required to address some fundamental sources of uncertainty]	Developing [We understand the basics, but much additional science or technique development is required to address some fundamental sources of uncertainty]	Starting [We are just beginning to understand what is going on]	Within a few months	Frequently	A lack of access to information		A lack of consensus within the science community	State GOVERNMENT employee		Mid career (10 - 20 yrs)	1000 or more	White		Male	United States of America
100	958	TRUE	2021-03-10 09:31:12								Agricultural science
100	924	TRUE	2021-03-10 10:32:45	51 and above	11 to 50	11 to 50	51 and above	51 and above	11 to 50	Earth Science	Natural Resource Management		Very familiar	Extremely familiar	Very well	Yes	Extremely familiar	Regularly reading a particular peer-reviewed journal (or set of journals),Peer-reviewed paper recommendations from others in my field (including via Twitter feeds),Professional conferences,Personal communication, i.e. just talking to someone about a field,Non peer-reviewed material, i.e. news articles, websites and blogs		Reading peer-reviewed papers from that discipline,Contacting a colleague in that discipline,Attend a conference,A research network, i.e. the Earth Science Research Network		Somewhat difficult	Yes	Very familiar	Contacting a colleague in that discipline		Somewhat difficult	1 - 3 papers per year	1 - 3 papers per year	None	Once	Once	Somewhat Challenging	Mature [We understand the underlying mechanisms, and have adequate techniques for monitoring, but there are a few areas where improvements are needed]	Developing [We understand the basics, but much additional science or technique development is required to address some fundamental sources of uncertainty]	I do not know	Within a few months	Sometimes	Other	Issues taking plot level info and appropriately extrapolating across landscapes in a reliable way. Data is limited and we're in novel conditions where data from the 1900's is likely not relevant.	Other	State GOVERNMENT employee		Mid career (10 - 20 yrs)	20-49	Prefer not to say		Prefer not to say	United States of America
100	565	TRUE	2021-03-10 10:44:08	Less than 10	11 to 50	Less than 10	11 to 50	11 to 50	Less than 10	Life Science	Other	Wildlife ecology and disease	Moderately familiar	Very familiar	Moderately well	Yes	Extremely familiar	Regularly reading a particular peer-reviewed journal (or set of journals)		Reading peer-reviewed papers from that discipline		Easy	Yes	Very familiar	Reading peer-reviewed papers from that discipline		Somewhat easy	None	1 - 3 papers per year	1 - 3 papers per year	A few times (x2)	A few times (x2)	I have never needed to do this	Developing [We understand the basics, but much additional science or technique development is required to address some fundamental sources of uncertainty]	Starting [We are just beginning to understand what is going on]	Developing [We understand the basics, but fundamental sources of uncertainty remain]	Within a few years	Frequently	Other	All of the above	A lack of synthesis	ACADEMIC		Senior (20 yrs +)	20-49	White		Male	United States of America
100	3321	TRUE	2021-03-10 10:53:21	None	Less than 10	None	Less than 10	Less than 10	Less than 10	Life Science	Natural Resource Management		Moderately familiar	Moderately familiar	Moderately well	Yes	Moderately familiar	Peer-reviewed paper recommendations from others in my field (including via Twitter feeds),Professional conferences,Personal communication, i.e. just talking to someone about a field		Reading peer-reviewed papers from that discipline,Reading synthesis papers from peer-reviewed literature,Wikipedia,Contacting a colleague in that discipline,Attend a conference		Somewhat difficult	Yes	Slightly familiar	Contacting a colleague in that discipline		Somewhat difficult	None	None	1 - 3 papers per year	Several times (x3)	Several times (x3)	I have never needed to do this	Developing [We understand the basics, but much additional science or technique development is required to address some fundamental sources of uncertainty]	Developing [We understand the basics, but much additional science or technique development is required to address some fundamental sources of uncertainty]	I do not know	Within a few years	Sometimes	A lack of consensus within the science community,A lack of staff/personnel		A lack of staff/personnel	State GOVERNMENT employee		Mid career (10 - 20 yrs)	1000 or more	White		Female	United States of America
100	631	TRUE	2021-03-10 11:11:58	11 to 50	None	None	51 and above	None	None	Earth Science	Plant Ecology		Moderately familiar	Moderately familiar	Poorly	Yes	Moderately familiar	Peer-reviewed paper recommendations from others in my field (including via Twitter feeds),Ad-hoc through paper reviews or literature reviews for a paper I'm writing,Non peer-reviewed material, i.e. news articles, websites and blogs		Reading peer-reviewed papers from that discipline,Reading synthesis papers from peer-reviewed literature,Contacting a colleague in that discipline,Google non-peer reviewed material, i.e. news articles, blogs etc.		Somewhat easy	Yes	Slightly familiar	Google non-peer reviewed material		Neither easy nor difficult	1 - 3 papers per year	1 - 3 papers per year	1 - 3 papers per year	A few times (x2)	Several times (x3)	I have never needed to do this	Mature [We understand the underlying mechanisms, and have adequate techniques for monitoring, but there are a few areas where improvements are needed]	Mature [We understand the underlying mechanisms, and have adequate techniques for monitoring, but there are a few areas where improvements are needed]	Mature [We understand the underlying mechanisms, but there is room for improvement]	>5 years	I do not know	Too many sources of information,A lack of access to information,A lack of staff/personnel,Problems in the structure of the management agency (i.e. laws and regulations restrict the management organization or agency in using new science)		Too many sources of information	Federal GOVERNMENT employee		Early career (1 - 10 yrs)	20-49	White		Female	United States of America
100	815	TRUE	2021-03-10 11:13:19	11 to 50	Less than 10	None	51 and above	11 to 50	None	Earth Science	Remote Sensing		Very familiar	Very familiar	Moderately well	Yes	Very familiar	Peer-reviewed paper recommendations from others in my field (including via Twitter feeds),Professional conferences,Personal communication, i.e. just talking to someone about a field		Reading peer-reviewed papers from that discipline,Reading synthesis papers from peer-reviewed literature,Contacting a colleague in that discipline,Attend a conference,Textbooks, or other education materials		Somewhat easy	Yes	Moderately familiar	Google scholar		Neither easy nor difficult	None	1 - 3 papers per year	None	A few times (x2)	A few times (x2)	Somewhat Challenging	Mature [We understand the underlying mechanisms, and have adequate techniques for monitoring, but there are a few areas where improvements are needed]	Developing [We understand the basics, but much additional science or technique development is required to address some fundamental sources of uncertainty]	I do not know	Within a few years	Frequently	A lack of synthesis,A lack of consensus within the science community,A lack of staff/personnel		A lack of staff/personnel	Federal GOVERNMENT employee		Early career (1 - 10 yrs)	20-49	White		Female	United States of America
100	370	TRUE	2021-03-10 11:29:05	None	None	None			Less than 10	Social Science	Other	Archaeology/Anthropology	Moderately familiar	Moderately familiar	Poorly	Yes	Moderately familiar	Non peer-reviewed material, i.e. news articles, websites and blogs		Reading peer-reviewed papers from that discipline		Somewhat easy	Yes	Slightly familiar	Contacting a colleague in that discipline		Neither easy nor difficult	None	None	None	A few times (x2)	Several times (x3)	I have never needed to do this	Mature [We understand the underlying mechanisms, and have adequate techniques for monitoring, but there are a few areas where improvements are needed]	Mature [We understand the underlying mechanisms, and have adequate techniques for monitoring, but there are a few areas where improvements are needed]	Mature [We understand the underlying mechanisms, but there is room for improvement]	Within a few years	Rarely	A lack of synthesis		Problems in the structure of the management agency (i.e. laws and regulations restrict the management organization or agency in using new science)	Local GOVERNMENT employee (city, county, etc.)		Mid career (10 - 20 yrs)	1000 or more	White		Female	United States of America
100	517	TRUE	2021-03-10 11:42:08	Less than 10	11 to 50	Less than 10	11 to 50	51 and above	Less than 10	Life Science	Natural Resource Management		Moderately familiar	Moderately familiar	Moderately well	Yes	Moderately familiar	Regularly reading a particular peer-reviewed journal (or set of journals),Professional conferences,Personal communication, i.e. just talking to someone about a field,Non peer-reviewed material, i.e. news articles, websites and blogs		Reading peer-reviewed papers from that discipline,Contacting a colleague in that discipline,Textbooks, or other education materials		Easy	Yes	Moderately familiar	Reading peer-reviewed papers from that discipline		Easy	1 - 3 papers per year	1 - 3 papers per year	1 - 3 papers per year	Once	Once	Somewhat Easy	Mature [We understand the underlying mechanisms, and have adequate techniques for monitoring, but there are a few areas where improvements are needed]	I do not know	I do not know	Within a few years	Sometimes	Too many sources of information,A lack of access to information,A lack of synthesis,A lack of staff/personnel,Problems in the structure of the management agency (i.e. laws and regulations restrict the management organization or agency in using new science),Other	Not enough land management staff, not enough time to devote to incorporating best science, information published by universities is generally often tangential to actual management practices	Problems in the structure of the management agency (i.e. laws and regulations restrict the management organization or agency in using new science)	ACADEMIC		Mid career (10 - 20 yrs)	2021-10-19	White		Male	United States of America
100	265	TRUE	2021-03-10 12:16:56	None	None		Less than 10	None	None	Earth Science	Natural Resource Management		Not familiar at all	Slightly familiar	Moderately well	No		Personal communication, i.e. just talking to someone about a field,Non peer-reviewed material, i.e. news articles, websites and blogs		Contacting a colleague in that discipline,Google non-peer reviewed material, i.e. news articles, blogs etc.		Easy	No		Google non-peer reviewed material		Easy	None	None	None	I do not read the peer-reviewed literature	I do not read the peer-reviewed literature	I have never needed to do this	Mature [We understand the underlying mechanisms, and have adequate techniques for monitoring, but there are a few areas where improvements are needed]	Mature [We understand the underlying mechanisms, and have adequate techniques for monitoring, but there are a few areas where improvements are needed]	Developing [We understand the basics, but fundamental sources of uncertainty remain]	Within a few years	Sometimes	A lack of synthesis		A lack of synthesis	PRIVATE-NOT-FOR-PROFIT, tax-exempt, charitable organization		Senior (20 yrs +)	2021-05-09	White		Male	United States of America
100	522	TRUE	2021-03-10 12:21:34	11 to 50	None	None	11 to 50	Less than 10	None	Earth Science	Natural Resource Management		Very familiar	Moderately familiar	Moderately well	Yes	Very familiar	Regularly reading a particular peer-reviewed journal (or set of journals),Peer-reviewed paper recommendations from others in my field (including via Twitter feeds),Professional conferences,Personal communication, i.e. just talking to someone about a field		Reading peer-reviewed papers from that discipline,Contacting a colleague in that discipline,Attend a conference		Neither easy nor difficult	Yes	Moderately familiar	Contacting a colleague in that discipline		Neither easy nor difficult	None	1 - 3 papers per year	1 - 3 papers per year	A few times (x2)	A few times (x2)	I have never needed to do this	Mature [We understand the underlying mechanisms, and have adequate techniques for monitoring, but there are a few areas where improvements are needed]	Starting [We are just beginning to understand what is going on]	Starting [We are just beginning to understand what is going on]	>5 years	Rarely	A lack of synthesis,A lack of consensus within the science community,Problems in the structure of the management agency (i.e. laws and regulations restrict the management organization or agency in using new science)		Problems in the structure of the management agency (i.e. laws and regulations restrict the management organization or agency in using new science)	Local GOVERNMENT employee (city, county, etc.)		Senior (20 yrs +)	2021-01-04	White		Male	United States of America
100	556	TRUE	2021-03-10 12:21:38	51 and above	Less than 10	Less than 10	51 and above	11 to 50	11 to 50	Earth Science	Aquatic Ecology		Very familiar	Very familiar	Poorly	Yes	Moderately familiar	Regularly reading a particular peer-reviewed journal (or set of journals),Peer-reviewed paper recommendations from others in my field (including via Twitter feeds),Professional conferences,Ad-hoc through paper reviews or literature reviews for a paper I'm writing,Personal communication, i.e. just talking to someone about a field,Non peer-reviewed material, i.e. news articles, websites and blogs		Reading peer-reviewed papers from that discipline,Reading synthesis papers from peer-reviewed literature,Contacting a colleague in that discipline,Attend a conference,A research network, i.e. the Earth Science Research Network		Easy	Yes	Moderately familiar	Reading peer-reviewed papers from that discipline		Somewhat easy	None	1 - 3 papers per year	1 - 3 papers per year	A few times (x2)	A few times (x2)	Not Easy; Not Challenging	I do not know	Developing [We understand the basics, but much additional science or technique development is required to address some fundamental sources of uncertainty]	I do not know	Within a few years	Frequently	A lack of synthesis,A lack of staff/personnel,Problems in the structure of the management agency (i.e. laws and regulations restrict the management organization or agency in using new science)		Problems in the structure of the management agency (i.e. laws and regulations restrict the management organization or agency in using new science)	Federal GOVERNMENT employee		Senior (20 yrs +)	100-249	Prefer not to say		Prefer not to say	United States of America
100	533	TRUE	2021-03-10 12:22:11	51 and above	51 and above	51 and above	51 and above	51 and above	51 and above	Life Science	Fire Ecology		Extremely familiar	Extremely familiar	Very well	Yes	Extremely familiar	Regularly reading a particular peer-reviewed journal (or set of journals),Peer-reviewed paper recommendations from others in my field (including via Twitter feeds),Professional conferences,Ad-hoc through paper reviews or literature reviews for a paper I'm writing,Personal communication, i.e. just talking to someone about a field,Non peer-reviewed material, i.e. news articles, websites and blogs		Reading peer-reviewed papers from that discipline,Reading synthesis papers from peer-reviewed literature,Contacting a colleague in that discipline,Google non-peer reviewed material, i.e. news articles, blogs etc.,Attend a conference,Textbooks, or other education materials,A research network, i.e. the Earth Science Research Network,If "other", please tell us what you use:	I have a substantial correspondence with peers and those in allied fields.	Easy	Yes	Extremely familiar	Reading peer-reviewed papers from that discipline		Easy	1 - 3 papers per year	4 - 12 papers per year	13 - 49 papers per year	A few times (x2)	A few times (x2)	Somewhat Easy	Mature [We understand the underlying mechanisms, and have adequate techniques for monitoring, but there are a few areas where improvements are needed]	Developing [We understand the basics, but much additional science or technique development is required to address some fundamental sources of uncertainty]	Developing [We understand the basics, but fundamental sources of uncertainty remain]	>5 years	Sometimes	Too many sources of information,A lack of access to information,A lack of synthesis,A lack of consensus within the science community,A lack of staff/personnel,Problems in the structure of the management agency (i.e. laws and regulations restrict the management organization or agency in using new science)		A lack of consensus within the science community	Federal GOVERNMENT employee		Senior (20 yrs +)	20-49	Prefer not to say		Prefer not to say	United States of America
100	526	TRUE	2021-03-10 12:24:15	Less than 10	11 to 50	Less than 10	11 to 50	51 and above	11 to 50	Life Science	Aquatic Ecology		Moderately familiar	Very familiar	Moderately well	Yes	Very familiar	Peer-reviewed paper recommendations from others in my field (including via Twitter feeds),Professional conferences,Ad-hoc through paper reviews or literature reviews for a paper I'm writing,Personal communication, i.e. just talking to someone about a field,Non peer-reviewed material, i.e. news articles, websites and blogs		Reading peer-reviewed papers from that discipline,Reading synthesis papers from peer-reviewed literature,Contacting a colleague in that discipline,Attend a conference		Somewhat easy	No		A research network, i.e. the Earth Science Research Network		Neither easy nor difficult	1 - 3 papers per year	4 - 12 papers per year	1 - 3 papers per year	A few times (x2)	Once	Challenging	Mature [We understand the underlying mechanisms, and have adequate techniques for monitoring, but there are a few areas where improvements are needed]	Mature [We understand the underlying mechanisms, and have adequate techniques for monitoring, but there are a few areas where improvements are needed]	Developing [We understand the basics, but fundamental sources of uncertainty remain]	>5 years	Sometimes	A lack of synthesis,A lack of staff/personnel		A lack of synthesis			Senior (20 yrs +)	100-249	White		Male	United States of America
100	784	TRUE	2021-03-10 12:32:05	11 to 50	Less than 10	Less than 10	51 and above	11 to 50	51 and above	Earth Science	Hydrology		Very familiar	Very familiar	Very well	Yes	Very familiar	Regularly reading a particular peer-reviewed journal (or set of journals),Peer-reviewed paper recommendations from others in my field (including via Twitter feeds),Professional conferences,Ad-hoc through paper reviews or literature reviews for a paper I'm writing,Personal communication, i.e. just talking to someone about a field,Non peer-reviewed material, i.e. news articles, websites and blogs		Reading peer-reviewed papers from that discipline,Reading synthesis papers from peer-reviewed literature,Contacting a colleague in that discipline,Attend a conference,A research network, i.e. the Earth Science Research Network		Somewhat difficult	Yes	Moderately familiar	Reading peer-reviewed papers from that discipline		Somewhat easy	None	1 - 3 papers per year	1 - 3 papers per year	A few times (x2)	A few times (x2)	Not Easy; Not Challenging	I do not know	Advanced [We can quantify the uncertainty and know the driving mechanisms]	Mature [We understand the underlying mechanisms, but there is room for improvement]	>10 years	Rarely	Problems in the structure of the management agency (i.e. laws and regulations restrict the management organization or agency in using new science)		A lack of staff/personnel	Local GOVERNMENT employee (city, county, etc.)		Senior (20 yrs +)	250-499	White		Male	United States of America
100	995	TRUE	2021-03-10 12:41:52	Less than 10	Less than 10	None	Less than 10	Less than 10	None	Life Science	Natural Resource Management		Slightly familiar	Moderately familiar	Moderately well	Yes	Moderately familiar	Personal communication, i.e. just talking to someone about a field,Non peer-reviewed material, i.e. news articles, websites and blogs,If "other", please tell us what you use:	Professional News Magazine (i.e. Wildlife Professional produced by The Wildlife Society)	Reading peer-reviewed papers from that discipline,Reading synthesis papers from peer-reviewed literature,Contacting a colleague in that discipline,Textbooks, or other education materials,If "other", please tell us what you use:	Consultation with SMEs and resource agencies	Somewhat difficult	Yes	Slightly familiar	Textbooks, or other educational materials		Somewhat difficult	None	None	None	A few times (x2)	Several times (x3)	I have never needed to do this	Mature [We understand the underlying mechanisms, and have adequate techniques for monitoring, but there are a few areas where improvements are needed]	Developing [We understand the basics, but much additional science or technique development is required to address some fundamental sources of uncertainty]	Developing [We understand the basics, but fundamental sources of uncertainty remain]	>5 years	Rarely	A lack of synthesis,A lack of staff/personnel,Problems in the structure of the management agency (i.e. laws and regulations restrict the management organization or agency in using new science)		Problems in the structure of the management agency (i.e. laws and regulations restrict the management organization or agency in using new science)	MILITARY		Senior (20 yrs +)	2021-10-19	White		Male	United States of America
100	2105	TRUE	2021-03-10 12:44:16	Less than 10	Less than 10	Less than 10	11 to 50	11 to 50	11 to 50	Earth Science	Other	Civil Engineering	Moderately familiar	Very familiar	Moderately well	Yes	Moderately familiar	Regularly reading a particular peer-reviewed journal (or set of journals),Professional conferences,Personal communication, i.e. just talking to someone about a field,Non peer-reviewed material, i.e. news articles, websites and blogs		Reading peer-reviewed papers from that discipline,Reading synthesis papers from peer-reviewed literature,Contacting a colleague in that discipline,Attend a conference,A research network, i.e. the Earth Science Research Network		Somewhat easy	No		Attend a conference		Somewhat easy	None	None	None	Once	A few times (x2)	Somewhat Easy	Advanced [We can quantify the uncertainty and know the driving mechanisms]	Developing [We understand the basics, but much additional science or technique development is required to address some fundamental sources of uncertainty]	Developing [We understand the basics, but fundamental sources of uncertainty remain]	>10 years	Rarely	A lack of consensus within the science community,Other	Political Motivations	A lack of consensus within the science community	Local GOVERNMENT employee (city, county, etc.)		Senior (20 yrs +)	20-49	White		Male	United States of America
100	474	TRUE	2021-03-10 12:45:34	Less than 10			11 to 50			Earth Science	Water Resource Management		Moderately familiar	Moderately familiar	Very well	Yes	Moderately familiar	Regularly reading a particular peer-reviewed journal (or set of journals),Professional conferences,Non peer-reviewed material, i.e. news articles, websites and blogs		Reading peer-reviewed papers from that discipline,Textbooks, or other education materials		Neither easy nor difficult	Yes	Moderately familiar	Google non-peer reviewed material		Neither easy nor difficult	None	1 - 3 papers per year	1 - 3 papers per year	A few times (x2)	A few times (x2)	I have never needed to do this	I do not know	Mature [We understand the underlying mechanisms, and have adequate techniques for monitoring, but there are a few areas where improvements are needed]	I do not know	Within a few years	Sometimes	Problems in the structure of the management agency (i.e. laws and regulations restrict the management organization or agency in using new science)		Problems in the structure of the management agency (i.e. laws and regulations restrict the management organization or agency in using new science)	Local GOVERNMENT employee (city, county, etc.)		Mid career (10 - 20 yrs)	1000 or more	White		Male	United States of America
100	473	TRUE	2021-03-10 12:48:07	11 to 50	11 to 50	Less than 10	51 and above	51 and above	51 and above	Life Science	Natural Resource Management		Moderately familiar	Very familiar	Moderately well	Yes	Extremely familiar	Regularly reading a particular peer-reviewed journal (or set of journals),Peer-reviewed paper recommendations from others in my field (including via Twitter feeds),Professional conferences,Personal communication, i.e. just talking to someone about a field,Non peer-reviewed material, i.e. news articles, websites and blogs		Reading peer-reviewed papers from that discipline,Textbooks, or other education materials,A research network, i.e. the Earth Science Research Network		Neither easy nor difficult	Yes	Moderately familiar	Reading peer-reviewed papers from that discipline		Somewhat easy	None	None	None	Several times (x3)	Several times (x3)	Not Easy; Not Challenging	Developing [We understand the basics, but much additional science or technique development is required to address some fundamental sources of uncertainty]	Mature [We understand the underlying mechanisms, and have adequate techniques for monitoring, but there are a few areas where improvements are needed]	Developing [We understand the basics, but fundamental sources of uncertainty remain]	I do not know	Sometimes	Too many sources of information,A lack of synthesis,A lack of staff/personnel,Other	The technology and databases used to share this information aren't updated frequently enough to spread the new information effectively.	Too many sources of information	PRIVATE-NOT-FOR-PROFIT, tax-exempt, charitable organization		Early career (1 - 10 yrs)	2021-05-09	White		Female	United States of America
100	473	TRUE	2021-03-10 12:51:39	Less than 10	Less than 10	None	Less than 10	51 and above	None	Life Science	Natural Resource Management		Slightly familiar	Moderately familiar	Moderately well	Yes	Very familiar	Regularly reading a particular peer-reviewed journal (or set of journals),Peer-reviewed paper recommendations from others in my field (including via Twitter feeds),Professional conferences,Ad-hoc through paper reviews or literature reviews for a paper I'm writing		Reading peer-reviewed papers from that discipline,Reading synthesis papers from peer-reviewed literature,Contacting a colleague in that discipline,Attend a conference,Textbooks, or other education materials		Somewhat easy	Yes	Slightly familiar	Google scholar		Somewhat easy	None	None	None	Once	A few times (x2)	Not Easy; Not Challenging	Mature [We understand the underlying mechanisms, and have adequate techniques for monitoring, but there are a few areas where improvements are needed]	Mature [We understand the underlying mechanisms, and have adequate techniques for monitoring, but there are a few areas where improvements are needed]	Mature [We understand the underlying mechanisms, but there is room for improvement]	Within a few years	Frequently	Too many sources of information,A lack of consensus within the science community,A lack of staff/personnel,Problems in the structure of the management agency (i.e. laws and regulations restrict the management organization or agency in using new science)		Problems in the structure of the management agency (i.e. laws and regulations restrict the management organization or agency in using new science)	Federal GOVERNMENT employee		Mid career (10 - 20 yrs)	20-49	White		Male	United States of America
100	621	TRUE	2021-03-10 12:53:21	None	None	None	Less than 10	None	None	Earth Science	Natural Resource Management		Not familiar at all	Not familiar at all	Very well	No		Personal communication, i.e. just talking to someone about a field		Contacting a colleague in that discipline		Easy	No		Contacting a colleague in that discipline		Very difficult	None	None	None	Once	Once	Easy	Advanced [We can quantify the uncertainty and know the driving mechanisms]	Advanced [We can quantify the uncertainty and know the driving mechanisms]	Advanced [We understand the driving mechanisms and can quantify cost and risk reasonably accurately]	Within a few years	Frequently	Other		Other	Federal GOVERNMENT employee		Senior (20 yrs +)	500-999	American Indian or Alaska Native		Male	United States of America
100	671	TRUE	2021-03-10 13:07:32	None	11 to 50	Less than 10	Less than 10	51 and above	11 to 50	Life Science	Natural Resource Management		Moderately familiar	Moderately familiar	Moderately well	Yes	Very familiar	Regularly reading a particular peer-reviewed journal (or set of journals),Peer-reviewed paper recommendations from others in my field (including via Twitter feeds),Personal communication, i.e. just talking to someone about a field		Reading peer-reviewed papers from that discipline,Reading synthesis papers from peer-reviewed literature,Wikipedia		Neither easy nor difficult	Yes	Moderately familiar	Reading peer-reviewed papers from that discipline		Neither easy nor difficult	None	None	None	Once	Once	I have never needed to do this	Developing [We understand the basics, but much additional science or technique development is required to address some fundamental sources of uncertainty]	Developing [We understand the basics, but much additional science or technique development is required to address some fundamental sources of uncertainty]	Developing [We understand the basics, but fundamental sources of uncertainty remain]	Within a few months	Sometimes	Too many sources of information,A lack of access to information,A lack of synthesis,A lack of consensus within the science community,A lack of staff/personnel,Problems in the structure of the management agency (i.e. laws and regulations restrict the management organization or agency in using new science)		A lack of staff/personnel	Federal GOVERNMENT employee		Senior (20 yrs +)	1000 or more	White		Male	United States of America
100	513	TRUE	2021-03-10 13:22:59	Less than 10	Less than 10	Less than 10	Less than 10	11 to 50	Less than 10	Life Science	Natural Resource Management		Moderately familiar	Moderately familiar	Moderately well	No		Regularly reading a particular peer-reviewed journal (or set of journals),Peer-reviewed paper recommendations from others in my field (including via Twitter feeds),Professional conferences,Personal communication, i.e. just talking to someone about a field,Non peer-reviewed material, i.e. news articles, websites and blogs		Reading peer-reviewed papers from that discipline,Reading synthesis papers from peer-reviewed literature,Contacting a colleague in that discipline,Google non-peer reviewed material, i.e. news articles, blogs etc.,Attend a conference,Textbooks, or other education materials,A research network, i.e. the Earth Science Research Network		Neither easy nor difficult	No		Reading peer-reviewed papers from that discipline		Neither easy nor difficult	None	None	None	Several times (x3)	A few times (x2)	Challenging	Advanced [We can quantify the uncertainty and know the driving mechanisms]	Developing [We understand the basics, but much additional science or technique development is required to address some fundamental sources of uncertainty]	Developing [We understand the basics, but fundamental sources of uncertainty remain]	>5 years	Sometimes	A lack of synthesis,A lack of consensus within the science community,Problems in the structure of the management agency (i.e. laws and regulations restrict the management organization or agency in using new science)		Problems in the structure of the management agency (i.e. laws and regulations restrict the management organization or agency in using new science)	PRIVATE-NOT-FOR-PROFIT, tax-exempt, charitable organization		Mid career (10 - 20 yrs)	2021-01-04	White		Male	United States of America
100	431	TRUE	2021-03-10 13:25:30	Less than 10	Less than 10	None	Less than 10	Less than 10	None	Earth Science	Natural Resource Management		Moderately familiar	Moderately familiar	Poorly	Yes	Moderately familiar	Peer-reviewed paper recommendations from others in my field (including via Twitter feeds),Professional conferences,Non peer-reviewed material, i.e. news articles, websites and blogs		Reading peer-reviewed papers from that discipline		Somewhat difficult	Yes	Slightly familiar	Google scholar		Neither easy nor difficult	1 - 3 papers per year	1 - 3 papers per year	1 - 3 papers per year	A few times (x2)	A few times (x2)	Somewhat Easy	Advanced [We can quantify the uncertainty and know the driving mechanisms]	Mature [We understand the underlying mechanisms, and have adequate techniques for monitoring, but there are a few areas where improvements are needed]	Mature [We understand the underlying mechanisms, but there is room for improvement]	Within a few years	Sometimes	A lack of synthesis,A lack of consensus within the science community		A lack of synthesis	ACADEMIC		Early career (1 - 10 yrs)	500-999	White		Female	United States of America
100	541	TRUE	2021-03-10 13:32:12	Less than 10	Less than 10	None	11 to 50	11 to 50	Less than 10	Life Science	Natural Resource Management		Slightly familiar	Moderately familiar	Moderately well	Yes	Moderately familiar	Peer-reviewed paper recommendations from others in my field (including via Twitter feeds),Professional conferences,Personal communication, i.e. just talking to someone about a field,Non peer-reviewed material, i.e. news articles, websites and blogs		Reading peer-reviewed papers from that discipline,Reading synthesis papers from peer-reviewed literature,Contacting a colleague in that discipline,Attend a conference,A research network, i.e. the Earth Science Research Network		Neither easy nor difficult	Yes	Slightly familiar	Reading synthesis papers from peer-reviewed literature		Neither easy nor difficult	None	None	None	A few times (x2)	A few times (x2)	Not Easy; Not Challenging	Developing [We understand the basics, but much additional science or technique development is required to address some fundamental sources of uncertainty]	Mature [We understand the underlying mechanisms, and have adequate techniques for monitoring, but there are a few areas where improvements are needed]	Mature [We understand the underlying mechanisms, but there is room for improvement]	>5 years	Sometimes	A lack of consensus within the science community,Problems in the structure of the management agency (i.e. laws and regulations restrict the management organization or agency in using new science)		Problems in the structure of the management agency (i.e. laws and regulations restrict the management organization or agency in using new science)	Local GOVERNMENT employee (city, county, etc.)		Early career (1 - 10 yrs)	2021-10-19	White		Female	United States of America
100	470	TRUE	2021-03-10 13:32:52	Less than 10	None	Less than 10	11 to 50	Less than 10	11 to 50	Social Science	Natural Resource Management		Slightly familiar	Slightly familiar	Poorly	No		Peer-reviewed paper recommendations from others in my field (including via Twitter feeds),Ad-hoc through paper reviews or literature reviews for a paper I'm writing,Personal communication, i.e. just talking to someone about a field		Reading peer-reviewed papers from that discipline,Reading synthesis papers from peer-reviewed literature,Contacting a colleague in that discipline,Textbooks, or other education materials		Somewhat easy	No		Contacting a colleague in that discipline		Neither easy nor difficult	None	None	None	A few times (x2)	A few times (x2)	I have never needed to do this	Mature [We understand the underlying mechanisms, and have adequate techniques for monitoring, but there are a few areas where improvements are needed]	Mature [We understand the underlying mechanisms, and have adequate techniques for monitoring, but there are a few areas where improvements are needed]	Developing [We understand the basics, but fundamental sources of uncertainty remain]	Within a few years	Sometimes	A lack of staff/personnel		A lack of staff/personnel	Federal GOVERNMENT employee		Mid career (10 - 20 yrs)	1000 or more	White		Male	United States of America
100	910	TRUE	2021-03-10 13:38:08	Less than 10		Less than 10	11 to 50		Less than 10	Earth Science	Water Resource Management		Moderately familiar	Moderately familiar	Moderately well	Yes	Moderately familiar	Peer-reviewed paper recommendations from others in my field (including via Twitter feeds),Professional conferences		Reading synthesis papers from peer-reviewed literature,Attend a conference		Somewhat easy	No		Google non-peer reviewed material		Somewhat easy	None	None	None	A few times (x2)	A few times (x2)	Somewhat Challenging	Developing [We understand the basics, but much additional science or technique development is required to address some fundamental sources of uncertainty]	Developing [We understand the basics, but much additional science or technique development is required to address some fundamental sources of uncertainty]	Developing [We understand the basics, but fundamental sources of uncertainty remain]	Within a few years	Frequently	A lack of synthesis		A lack of synthesis	PRIVATE-NOT-FOR-PROFIT, tax-exempt, charitable organization		Mid career (10 - 20 yrs)	20-49	White		Male	United States of America
100	5353	TRUE	2021-03-10 13:46:19	11 to 50	None	None	11 to 50			Earth Science	Hydrology		Not familiar at all	Slightly familiar	Poorly	Yes	Slightly familiar	Peer-reviewed paper recommendations from others in my field (including via Twitter feeds),Non peer-reviewed material, i.e. news articles, websites and blogs		Reading peer-reviewed papers from that discipline,Reading synthesis papers from peer-reviewed literature,Contacting a colleague in that discipline,Attend a conference,Textbooks, or other education materials		Somewhat easy	No		Contacting a colleague in that discipline		Neither easy nor difficult	None	None	None	Several times (x3)	Several times (x3)	Somewhat Challenging	I do not know	Developing [We understand the basics, but much additional science or technique development is required to address some fundamental sources of uncertainty]	Developing [We understand the basics, but fundamental sources of uncertainty remain]	>10 years	Rarely	Other	Communication between scientists and managers/policy makers	A lack of staff/personnel	Local GOVERNMENT employee (city, county, etc.)		Early career (1 - 10 yrs)	2021-01-04	White		Female	United States of America
100	3292	TRUE	2021-03-10 14:17:16	Less than 10	Less than 10	Less than 10	Less than 10	11 to 50	Less than 10	Life Science	Fire Ecology		Moderately familiar	Moderately familiar	Moderately well	Yes	Moderately familiar	Regularly reading a particular peer-reviewed journal (or set of journals),Peer-reviewed paper recommendations from others in my field (including via Twitter feeds),Professional conferences,Ad-hoc through paper reviews or literature reviews for a paper I'm writing,Personal communication, i.e. just talking to someone about a field,Non peer-reviewed material, i.e. news articles, websites and blogs		Reading peer-reviewed papers from that discipline,Reading synthesis papers from peer-reviewed literature,Contacting a colleague in that discipline,Attend a conference,A research network, i.e. the Earth Science Research Network		Somewhat easy	No		A research network, i.e. the Earth Science Research Network		Neither easy nor difficult	None	None	None	A few times (x2)	A few times (x2)	I have never needed to do this	Mature [We understand the underlying mechanisms, and have adequate techniques for monitoring, but there are a few areas where improvements are needed]	Mature [We understand the underlying mechanisms, and have adequate techniques for monitoring, but there are a few areas where improvements are needed]	Mature [We understand the underlying mechanisms, but there is room for improvement]	Within a few years	Sometimes	A lack of synthesis,A lack of consensus within the science community,Problems in the structure of the management agency (i.e. laws and regulations restrict the management organization or agency in using new science)		Problems in the structure of the management agency (i.e. laws and regulations restrict the management organization or agency in using new science)	Federal GOVERNMENT employee		Mid career (10 - 20 yrs)	2021-10-19	White		Female	United States of America
100	1522	TRUE	2021-03-10 14:26:12	Less than 10	11 to 50	Less than 10	11 to 50	51 and above	11 to 50	Life Science	Natural Resource Management		Very familiar	Extremely familiar	Very well	Yes	Very familiar	Peer-reviewed paper recommendations from others in my field (including via Twitter feeds),Professional conferences,Personal communication, i.e. just talking to someone about a field,Non peer-reviewed material, i.e. news articles, websites and blogs,If "other", please tell us what you use:	Literature Reviews	Reading peer-reviewed papers from that discipline,Reading synthesis papers from peer-reviewed literature,Contacting a colleague in that discipline,Attend a conference,A research network, i.e. the Earth Science Research Network		Somewhat easy	Yes	Moderately familiar	Reading peer-reviewed papers from that discipline		Somewhat easy	None	None	None	A few times (x2)	A few times (x2)	Somewhat Challenging	Mature [We understand the underlying mechanisms, and have adequate techniques for monitoring, but there are a few areas where improvements are needed]	Mature [We understand the underlying mechanisms, and have adequate techniques for monitoring, but there are a few areas where improvements are needed]	Mature [We understand the underlying mechanisms, but there is room for improvement]	>5 years	Sometimes	A lack of staff/personnel,Problems in the structure of the management agency (i.e. laws and regulations restrict the management organization or agency in using new science),Other	Inadequate funding, political climate	Other	Federal GOVERNMENT employee		Senior (20 yrs +)	100-249	White		Female	United States of America
100	360	TRUE	2021-03-10 14:40:47	Less than 10	11 to 50	11 to 50	51 and above	51 and above	51 and above	Life Science	Wildlife Biology		Moderately familiar	Very familiar	Moderately well	Yes	Very familiar	Peer-reviewed paper recommendations from others in my field (including via Twitter feeds),Professional conferences,Personal communication, i.e. just talking to someone about a field		Reading peer-reviewed papers from that discipline,Contacting a colleague in that discipline		Neither easy nor difficult	No		Contacting a colleague in that discipline		Neither easy nor difficult	None	None	None	Many times (>4)	A few times (x2)	Somewhat Challenging	I do not know	I do not know	Developing [We understand the basics, but fundamental sources of uncertainty remain]	I do not know	I do not know	Other,I do not know		A lack of staff/personnel	State GOVERNMENT employee		Early career (1 - 10 yrs)	20-49	White		Female	United States of America
100	424	TRUE	2021-03-10 14:41:46	11 to 50	Less than 10	11 to 50	11 to 50	Less than 10	51 and above	Social Science	Water Resource Management		Moderately familiar	Very familiar	Very well	Yes	Extremely familiar	Regularly reading a particular peer-reviewed journal (or set of journals),Peer-reviewed paper recommendations from others in my field (including via Twitter feeds),Professional conferences,Ad-hoc through paper reviews or literature reviews for a paper I'm writing,Personal communication, i.e. just talking to someone about a field,Non peer-reviewed material, i.e. news articles, websites and blogs,I…	Webinars	Reading peer-reviewed papers from that discipline,Attend a conference		Somewhat difficult	Yes	Very familiar	Contacting a colleague in that discipline		Neither easy nor difficult	1 - 3 papers per year	None	None	A few times (x2)	A few times (x2)	I have never needed to do this	Developing [We understand the basics, but much additional science or technique development is required to address some fundamental sources of uncertainty]	Developing [We understand the basics, but much additional science or technique development is required to address some fundamental sources of uncertainty]	Starting [We are just beginning to understand what is going on]	>10 years	Sometimes	A lack of consensus within the science community,Problems in the structure of the management agency (i.e. laws and regulations restrict the management organization or agency in using new science),Other	Ignorance of Indigenous knowledges and methodologies, dismissal of these as not "real" science; political barriers which prevent the incorporation of approaches which go against business as usual	Problems in the structure of the management agency (i.e. laws and regulations restrict the management organization or agency in using new science)	State GOVERNMENT employee		Early career (1 - 10 yrs)	20-49	White		Non-binary / third gender	United States of America
100	506	TRUE	2021-03-10 14:43:32	None	None	None	11 to 50	51 and above	Less than 10	Life Science	Wildlife Biology		Slightly familiar	Slightly familiar	Poorly	Yes	Moderately familiar	Peer-reviewed paper recommendations from others in my field (including via Twitter feeds),Professional conferences,Ad-hoc through paper reviews or literature reviews for a paper I'm writing,Personal communication, i.e. just talking to someone about a field,Non peer-reviewed material, i.e. news articles, websites and blogs		Reading peer-reviewed papers from that discipline,Reading synthesis papers from peer-reviewed literature,Contacting a colleague in that discipline		Somewhat easy	No		Reading peer-reviewed papers from that discipline		Neither easy nor difficult	None	1 - 3 papers per year	None	Several times (x3)	A few times (x2)	I have never needed to do this	Mature [We understand the underlying mechanisms, and have adequate techniques for monitoring, but there are a few areas where improvements are needed]	Mature [We understand the underlying mechanisms, and have adequate techniques for monitoring, but there are a few areas where improvements are needed]	Mature [We understand the underlying mechanisms, but there is room for improvement]	I do not know	Frequently	Too many sources of information,A lack of synthesis,A lack of consensus within the science community,A lack of staff/personnel		A lack of synthesis	State GOVERNMENT employee		Early career (1 - 10 yrs)	50-99	White		Female	United States of America
100	402	TRUE	2021-03-10 14:44:18	Less than 10	11 to 50	Less than 10	Less than 10	11 to 50	Less than 10	Life Science	Wildlife Biology		Moderately familiar	Very familiar	Moderately well	Yes	Very familiar	Regularly reading a particular peer-reviewed journal (or set of journals),Peer-reviewed paper recommendations from others in my field (including via Twitter feeds),Professional conferences,Ad-hoc through paper reviews or literature reviews for a paper I'm writing,Personal communication, i.e. just talking to someone about a field,Non peer-reviewed material, i.e. news articles, websites and blogs		Reading peer-reviewed papers from that discipline,Reading synthesis papers from peer-reviewed literature,Wikipedia,Contacting a colleague in that discipline,Google non-peer reviewed material, i.e. news articles, blogs etc.,Attend a conference		Somewhat easy	No		Reading synthesis papers from peer-reviewed literature		Somewhat easy	1 - 3 papers per year	1 - 3 papers per year	None	A few times (x2)	Several times (x3)	Not Easy; Not Challenging	Developing [We understand the basics, but much additional science or technique development is required to address some fundamental sources of uncertainty]	Mature [We understand the underlying mechanisms, and have adequate techniques for monitoring, but there are a few areas where improvements are needed]	Mature [We understand the underlying mechanisms, but there is room for improvement]	>5 years	Sometimes	Problems in the structure of the management agency (i.e. laws and regulations restrict the management organization or agency in using new science)		Problems in the structure of the management agency (i.e. laws and regulations restrict the management organization or agency in using new science)	State GOVERNMENT employee		Early career (1 - 10 yrs)	2021-05-09	White		Male	United States of America
100	360	TRUE	2021-03-10 14:45:08	Less than 10	Less than 10	None	11 to 50	11 to 50	None	Life Science	Natural Resource Management		Moderately familiar	Moderately familiar	Poorly	Yes	Very familiar	Peer-reviewed paper recommendations from others in my field (including via Twitter feeds),Professional conferences,Personal communication, i.e. just talking to someone about a field		Reading peer-reviewed papers from that discipline,Attend a conference,Textbooks, or other education materials		Somewhat easy	Yes	Very familiar	Contacting a colleague in that discipline		Neither easy nor difficult	None	1 - 3 papers per year	None	A few times (x2)	A few times (x2)	I have never needed to do this	Developing [We understand the basics, but much additional science or technique development is required to address some fundamental sources of uncertainty]	Developing [We understand the basics, but much additional science or technique development is required to address some fundamental sources of uncertainty]	Developing [We understand the basics, but fundamental sources of uncertainty remain]	Within a few years	Sometimes	A lack of access to information		A lack of access to information	State GOVERNMENT employee		Early career (1 - 10 yrs)	500-999	White		Female	United States of America
100	596	TRUE	2021-03-10 14:46:54	None	None	None	None	Less than 10	None	Life Science	Natural Resource Management		Slightly familiar	Slightly familiar	Poorly	Yes	Slightly familiar	Personal communication, i.e. just talking to someone about a field		Contacting a colleague in that discipline		Somewhat difficult	No		Contacting a colleague in that discipline		Somewhat difficult	None	None	None	Once	Once	I have never needed to do this	Mature [We understand the underlying mechanisms, and have adequate techniques for monitoring, but there are a few areas where improvements are needed]	Mature [We understand the underlying mechanisms, and have adequate techniques for monitoring, but there are a few areas where improvements are needed]	Developing [We understand the basics, but fundamental sources of uncertainty remain]	Within a few years	Sometimes	Other	Interagency bureaucracy	Problems in the structure of the management agency (i.e. laws and regulations restrict the management organization or agency in using new science)	State GOVERNMENT employee		Early career (1 - 10 yrs)	2021-05-09	White		Male	United States of America
100	489	TRUE	2021-03-10 14:48:25	11 to 50	None	Less than 10	11 to 50	None	Less than 10	Earth Science	Natural Resource Management		Moderately familiar	Moderately familiar	Moderately well	Yes	Very familiar	Regularly reading a particular peer-reviewed journal (or set of journals),Peer-reviewed paper recommendations from others in my field (including via Twitter feeds),Professional conferences,Ad-hoc through paper reviews or literature reviews for a paper I'm writing,Personal communication, i.e. just talking to someone about a field,Non peer-reviewed material, i.e. news articles, websites and blogs		Reading peer-reviewed papers from that discipline,Google non-peer reviewed material, i.e. news articles, blogs etc.		Somewhat easy	Yes	Slightly familiar	Google scholar		Somewhat easy	None	None	None	A few times (x2)	A few times (x2)	I have never needed to do this	I do not know	Developing [We understand the basics, but much additional science or technique development is required to address some fundamental sources of uncertainty]	Developing [We understand the basics, but fundamental sources of uncertainty remain]	Within a few years	Sometimes	Too many sources of information,A lack of staff/personnel,Problems in the structure of the management agency (i.e. laws and regulations restrict the management organization or agency in using new science)		A lack of staff/personnel	State GOVERNMENT employee		Mid career (10 - 20 yrs)	1000 or more	White		Female	United States of America
100	2071	TRUE	2021-03-10 14:48:49	Less than 10	Less than 10	None	Less than 10	Less than 10	Less than 10	Earth Science	Fire Ecology		Very familiar	Very familiar	Moderately well	Yes	Moderately familiar	Regularly reading a particular peer-reviewed journal (or set of journals)		Reading peer-reviewed papers from that discipline,Reading synthesis papers from peer-reviewed literature,Contacting a colleague in that discipline,Textbooks, or other education materials,A research network, i.e. the Earth Science Research Network		Easy	Yes	Moderately familiar	Reading peer-reviewed papers from that discipline		Somewhat easy	1 - 3 papers per year	1 - 3 papers per year	1 - 3 papers per year	Once	A few times (x2)	Somewhat Challenging	Advanced [We can quantify the uncertainty and know the driving mechanisms]	Developing [We understand the basics, but much additional science or technique development is required to address some fundamental sources of uncertainty]	Mature [We understand the underlying mechanisms, but there is room for improvement]	>10 years	Sometimes	A lack of staff/personnel		A lack of staff/personnel	Federal GOVERNMENT employee		Senior (20 yrs +)	2021-10-19	White		Male	United States of America
100	753	TRUE	2021-03-10 14:49:18	11 to 50	11 to 50	None	11 to 50	11 to 50	Less than 10	Life Science	Natural Resource Management		Moderately familiar	Moderately familiar	Moderately well	Yes	Moderately familiar	Peer-reviewed paper recommendations from others in my field (including via Twitter feeds),Personal communication, i.e. just talking to someone about a field,Non peer-reviewed material, i.e. news articles, websites and blogs		Reading peer-reviewed papers from that discipline,Contacting a colleague in that discipline,Textbooks, or other education materials,A research network, i.e. the Earth Science Research Network		Somewhat easy	Yes	Slightly familiar	Reading peer-reviewed papers from that discipline		Neither easy nor difficult	None	None	None	A few times (x2)	A few times (x2)	Not Easy; Not Challenging	Developing [We understand the basics, but much additional science or technique development is required to address some fundamental sources of uncertainty]	Developing [We understand the basics, but much additional science or technique development is required to address some fundamental sources of uncertainty]	Developing [We understand the basics, but fundamental sources of uncertainty remain]	Within a few years	I do not know	A lack of access to information,A lack of consensus within the science community		A lack of consensus within the science community	State GOVERNMENT employee		Mid career (10 - 20 yrs)	500-999	White		Female	United States of America
100	514	TRUE	2021-03-10 14:50:12	Less than 10	Less than 10	Less than 10	11 to 50	11 to 50	11 to 50	Earth Science	Natural Resource Management		Not familiar at all	Slightly familiar	Poorly	Yes	Not familiar at all	Professional conferences,Personal communication, i.e. just talking to someone about a field,Non peer-reviewed material, i.e. news articles, websites and blogs		Reading peer-reviewed papers from that discipline,Reading synthesis papers from peer-reviewed literature,Contacting a colleague in that discipline,Google non-peer reviewed material, i.e. news articles, blogs etc.,Attend a conference,A research network, i.e. the Earth Science Research Network		Neither easy nor difficult	No		Contacting a colleague in that discipline		Neither easy nor difficult	None	None	None	A few times (x2)	A few times (x2)	Challenging	Developing [We understand the basics, but much additional science or technique development is required to address some fundamental sources of uncertainty]	Developing [We understand the basics, but much additional science or technique development is required to address some fundamental sources of uncertainty]	Mature [We understand the underlying mechanisms, but there is room for improvement]	Within a few years	Frequently	A lack of synthesis,Problems in the structure of the management agency (i.e. laws and regulations restrict the management organization or agency in using new science)		A lack of access to information	State GOVERNMENT employee		Mid career (10 - 20 yrs)	1000 or more	White		Female	United States of America
100	407	TRUE	2021-03-10 14:50:48	None	Less than 10	Less than 10	None	11 to 50	Less than 10	Life Science	Environmental Politics and Policy		Slightly familiar	Slightly familiar	Not at all	No		Personal communication, i.e. just talking to someone about a field,Non peer-reviewed material, i.e. news articles, websites and blogs		Reading peer-reviewed papers from that discipline,Contacting a colleague in that discipline,Google non-peer reviewed material, i.e. news articles, blogs etc.,Attend a conference		Neither easy nor difficult	Yes	Slightly familiar	Google non-peer reviewed material		Neither easy nor difficult	None	None	None	Several times (x3)	A few times (x2)	I have never needed to do this	Mature [We understand the underlying mechanisms, and have adequate techniques for monitoring, but there are a few areas where improvements are needed]	Mature [We understand the underlying mechanisms, and have adequate techniques for monitoring, but there are a few areas where improvements are needed]	Mature [We understand the underlying mechanisms, but there is room for improvement]	>5 years	Sometimes	Too many sources of information,A lack of access to information,A lack of synthesis,A lack of staff/personnel		A lack of synthesis	State GOVERNMENT employee		Early career (1 - 10 yrs)	250-499	White		Female	United States of America
100	522	TRUE	2021-03-10 14:51:30	Less than 10	11 to 50	None	Less than 10	51 and above	Less than 10	Life Science	Natural Resource Management		Extremely familiar	Extremely familiar	Very well	Yes	Extremely familiar	Peer-reviewed paper recommendations from others in my field (including via Twitter feeds),Professional conferences,Ad-hoc through paper reviews or literature reviews for a paper I'm writing,Personal communication, i.e. just talking to someone about a field		Reading peer-reviewed papers from that discipline,Reading synthesis papers from peer-reviewed literature,Contacting a colleague in that discipline,Attend a conference,If "other", please tell us what you use:	published datasets	Easy	Yes	Very familiar	Reading synthesis papers from peer-reviewed literature		Easy	1 - 3 papers per year	1 - 3 papers per year	None	A few times (x2)	A few times (x2)	I have never needed to do this	I do not know	I do not know	I do not know	>5 years	I do not know	A lack of access to information,A lack of synthesis,A lack of consensus within the science community		A lack of access to information	State GOVERNMENT employee		Early career (1 - 10 yrs)	2021-10-19	White		Female	United States of America
100	435	TRUE	2021-03-10 14:53:06	11 to 50	Less than 10	None	51 and above	11 to 50	None	Life Science	Hydrology		Very familiar	Very familiar	Moderately well	Yes	Moderately familiar	Regularly reading a particular peer-reviewed journal (or set of journals)		Reading peer-reviewed papers from that discipline		Somewhat easy	Yes	Slightly familiar	Google scholar		Neither easy nor difficult	None	None	None	Many times (>4)	Several times (x3)	Somewhat Easy	Mature [We understand the underlying mechanisms, and have adequate techniques for monitoring, but there are a few areas where improvements are needed]	Mature [We understand the underlying mechanisms, and have adequate techniques for monitoring, but there are a few areas where improvements are needed]	Advanced [We understand the driving mechanisms and can quantify cost and risk reasonably accurately]	Within a few years	Frequently	A lack of access to information		Problems in the structure of the management agency (i.e. laws and regulations restrict the management organization or agency in using new science)	State GOVERNMENT employee		Early career (1 - 10 yrs)	2021-10-19	White		Male	United States of America
100	884	TRUE	2021-03-10 14:53:43	Less than 10	Less than 10	None	11 to 50	51 and above	None	Life Science	Aquatic Ecology		Slightly familiar	Moderately familiar	Poorly	Yes	Moderately familiar	Peer-reviewed paper recommendations from others in my field (including via Twitter feeds),Ad-hoc through paper reviews or literature reviews for a paper I'm writing,Personal communication, i.e. just talking to someone about a field		Reading peer-reviewed papers from that discipline,Reading synthesis papers from peer-reviewed literature,Contacting a colleague in that discipline,A research network, i.e. the Earth Science Research Network		Somewhat easy	No		Google scholar		Neither easy nor difficult	1 - 3 papers per year	1 - 3 papers per year	None	A few times (x2)	A few times (x2)	Somewhat Easy	I do not know	Developing [We understand the basics, but much additional science or technique development is required to address some fundamental sources of uncertainty]	I do not know	>5 years	Sometimes	A lack of staff/personnel,Problems in the structure of the management agency (i.e. laws and regulations restrict the management organization or agency in using new science)		A lack of staff/personnel	State GOVERNMENT employee		Early career (1 - 10 yrs)	1000 or more	White		Female	United States of America
100	526	TRUE	2021-03-10 14:57:08	Less than 10	11 to 50	None	11 to 50	51 and above	None	Life Science	Wildlife Biology		Moderately familiar	Moderately familiar	Moderately well	Yes	Very familiar	Ad-hoc through paper reviews or literature reviews for a paper I'm writing		Reading peer-reviewed papers from that discipline		Easy	No		Google scholar		Somewhat easy	None	1 - 3 papers per year	1 - 3 papers per year	A few times (x2)	A few times (x2)	Somewhat Easy	Mature [We understand the underlying mechanisms, and have adequate techniques for monitoring, but there are a few areas where improvements are needed]	Mature [We understand the underlying mechanisms, and have adequate techniques for monitoring, but there are a few areas where improvements are needed]	Developing [We understand the basics, but fundamental sources of uncertainty remain]	Within a few months	Frequently	Too many sources of information		Too many sources of information	Federal GOVERNMENT employee		Senior (20 yrs +)	50-99	White		Male	United States of America
100	430	TRUE	2021-03-10 14:58:11	11 to 50	11 to 50	Less than 10	11 to 50	11 to 50	Less than 10	Earth Science	Natural Resource Management		Moderately familiar	Moderately familiar	Moderately well	Yes	Moderately familiar	Peer-reviewed paper recommendations from others in my field (including via Twitter feeds),Professional conferences,Ad-hoc through paper reviews or literature reviews for a paper I'm writing,Personal communication, i.e. just talking to someone about a field,Non peer-reviewed material, i.e. news articles, websites and blogs		Reading peer-reviewed papers from that discipline,Reading synthesis papers from peer-reviewed literature,Contacting a colleague in that discipline,Attend a conference		Neither easy nor difficult	Yes	Slightly familiar	Google scholar		Neither easy nor difficult	None	None	None	A few times (x2)	A few times (x2)	I have never needed to do this	Mature [We understand the underlying mechanisms, and have adequate techniques for monitoring, but there are a few areas where improvements are needed]	Mature [We understand the underlying mechanisms, and have adequate techniques for monitoring, but there are a few areas where improvements are needed]	Mature [We understand the underlying mechanisms, but there is room for improvement]	Within a few years	Frequently	A lack of access to information		A lack of access to information	State GOVERNMENT employee		Early career (1 - 10 yrs)	20-49	White		Male	United States of America
100	690	TRUE	2021-03-10 15:01:23	11 to 50	11 to 50	Less than 10	11 to 50	51 and above	Less than 10	Life Science	Aquatic Ecology		Moderately familiar	Moderately familiar	Poorly	Yes	Moderately familiar	Peer-reviewed paper recommendations from others in my field (including via Twitter feeds),Professional conferences,Ad-hoc through paper reviews or literature reviews for a paper I'm writing,Personal communication, i.e. just talking to someone about a field,Non peer-reviewed material, i.e. news articles, websites and blogs		Reading peer-reviewed papers from that discipline,Reading synthesis papers from peer-reviewed literature,Contacting a colleague in that discipline,Google non-peer reviewed material, i.e. news articles, blogs etc.,Attend a conference,Textbooks, or other education materials		Somewhat easy	No		Contacting a colleague in that discipline		Somewhat difficult	None	1 - 3 papers per year	None	Several times (x3)	Many times (>4)	Somewhat Easy		Developing [We understand the basics, but much additional science or technique development is required to address some fundamental sources of uncertainty]	Developing [We understand the basics, but fundamental sources of uncertainty remain]	Within a few years	Frequently	Too many sources of information,A lack of access to information,A lack of synthesis,A lack of staff/personnel,Problems in the structure of the management agency (i.e. laws and regulations restrict the management organization or agency in using new science)		Too many sources of information	State GOVERNMENT employee		Early career (1 - 10 yrs)	100-249	White		Female	United States of America
100	1188	TRUE	2021-03-10 15:05:21	Less than 10	Less than 10	None	Less than 10	11 to 50	None	Life Science	Natural Resource Management		Slightly familiar	Moderately familiar	Poorly	Yes	Moderately familiar	Professional conferences,Ad-hoc through paper reviews or literature reviews for a paper I'm writing,Personal communication, i.e. just talking to someone about a field,Non peer-reviewed material, i.e. news articles, websites and blogs		Wikipedia,Contacting a colleague in that discipline,Google non-peer reviewed material, i.e. news articles, blogs etc.,Attend a conference		Neither easy nor difficult	Yes	Slightly familiar	Wikipedia		Neither easy nor difficult	None	1 - 3 papers per year	None	A few times (x2)	A few times (x2)	Somewhat Challenging	Mature [We understand the underlying mechanisms, and have adequate techniques for monitoring, but there are a few areas where improvements are needed]	Developing [We understand the basics, but much additional science or technique development is required to address some fundamental sources of uncertainty]	Developing [We understand the basics, but fundamental sources of uncertainty remain]	>10 years	Frequently	Too many sources of information,A lack of staff/personnel,Problems in the structure of the management agency (i.e. laws and regulations restrict the management organization or agency in using new science)		Problems in the structure of the management agency (i.e. laws and regulations restrict the management organization or agency in using new science)	State GOVERNMENT employee		Mid career (10 - 20 yrs)	2021-10-19	White		Male	United States of America
100	612	TRUE	2021-03-10 15:06:43	None	Less than 10	None	None	Less than 10	None	Life Science	Wildlife Biology		Slightly familiar	Slightly familiar	Poorly	No		Personal communication, i.e. just talking to someone about a field		Contacting a colleague in that discipline		Somewhat difficult	No		Contacting a colleague in that discipline		Somewhat difficult	None	None	None	A few times (x2)	A few times (x2)	I have never needed to do this	I do not know	I do not know	I do not know	>5 years	I do not know	A lack of staff/personnel		A lack of staff/personnel	State GOVERNMENT employee		Mid career (10 - 20 yrs)	50-99	White		Female	United States of America
100	843	TRUE	2021-03-10 15:10:28	Less than 10	Less than 10	None	11 to 50	11 to 50	None	Earth Science	Water Resource Management		Moderately familiar	Moderately familiar	Moderately well	Yes	Moderately familiar	Regularly reading a particular peer-reviewed journal (or set of journals),Peer-reviewed paper recommendations from others in my field (including via Twitter feeds),Professional conferences,Ad-hoc through paper reviews or literature reviews for a paper I'm writing,Non peer-reviewed material, i.e. news articles, websites and blogs		Reading peer-reviewed papers from that discipline,Reading synthesis papers from peer-reviewed literature,Wikipedia,Contacting a colleague in that discipline,Google non-peer reviewed material, i.e. news articles, blogs etc.,Attend a conference,Textbooks, or other education materials		Somewhat easy	No		Google scholar		Neither easy nor difficult	None	None	None	A few times (x2)	A few times (x2)	Not Easy; Not Challenging	I do not know	Developing [We understand the basics, but much additional science or technique development is required to address some fundamental sources of uncertainty]	Starting [We are just beginning to understand what is going on]	I do not know	Frequently	A lack of access to information,A lack of synthesis		A lack of synthesis	State GOVERNMENT employee		Mid career (10 - 20 yrs)	1000 or more	White		Male	United States of America
100	702	TRUE	2021-03-10 15:11:17		Less than 10			11 to 50		Life Science	Wildlife Biology		Slightly familiar	Moderately familiar	Moderately well	Yes	Very familiar	Peer-reviewed paper recommendations from others in my field (including via Twitter feeds),Ad-hoc through paper reviews or literature reviews for a paper I'm writing,Non peer-reviewed material, i.e. news articles, websites and blogs,If "other", please tell us what you use:	Occasional intentional browsing of new literature in my specific sub-field (e.g., papers from the recent year based on Google Scholar searches)	Reading peer-reviewed papers from that discipline,Reading synthesis papers from peer-reviewed literature,Textbooks, or other education materials		Somewhat easy	Yes	Slightly familiar	Reading synthesis papers from peer-reviewed literature		Somewhat easy	1 - 3 papers per year	1 - 3 papers per year	1 - 3 papers per year	Once	Once	I have never needed to do this	I do not know	I do not know	I do not know	Within a few years	Rarely	A lack of staff/personnel,Problems in the structure of the management agency (i.e. laws and regulations restrict the management organization or agency in using new science)		Problems in the structure of the management agency (i.e. laws and regulations restrict the management organization or agency in using new science)	State GOVERNMENT employee		Mid career (10 - 20 yrs)	1000 or more	White		Male	United States of America
100	889	TRUE	2021-03-10 15:11:23	Less than 10	Less than 10	Less than 10	11 to 50	51 and above	11 to 50	Life Science	Mathematics/Statistics		Slightly familiar	Moderately familiar	Moderately well	Yes	Very familiar	Regularly reading a particular peer-reviewed journal (or set of journals),Peer-reviewed paper recommendations from others in my field (including via Twitter feeds),Professional conferences,Ad-hoc through paper reviews or literature reviews for a paper I'm writing		Reading peer-reviewed papers from that discipline,Reading synthesis papers from peer-reviewed literature,Contacting a colleague in that discipline		Somewhat difficult	Yes	Moderately familiar	Reading peer-reviewed papers from that discipline		Neither easy nor difficult	1 - 3 papers per year	1 - 3 papers per year	1 - 3 papers per year	Several times (x3)	Several times (x3)	Somewhat Challenging	Developing [We understand the basics, but much additional science or technique development is required to address some fundamental sources of uncertainty]	Starting [We are just beginning to understand what is going on]	Starting [We are just beginning to understand what is going on]	Within a few years	Sometimes	Too many sources of information,A lack of synthesis,Problems in the structure of the management agency (i.e. laws and regulations restrict the management organization or agency in using new science)		Problems in the structure of the management agency (i.e. laws and regulations restrict the management organization or agency in using new science)	Federal GOVERNMENT employee		Early career (1 - 10 yrs)	50-99	White		Male	United States of America
100	490	TRUE	2021-03-10 15:13:38	Less than 10	Less than 10	Less than 10	Less than 10	Less than 10	None	Life Science	Wildlife Biology		Moderately familiar	Very familiar	Poorly	No		Personal communication, i.e. just talking to someone about a field,Non peer-reviewed material, i.e. news articles, websites and blogs		Reading peer-reviewed papers from that discipline,Reading synthesis papers from peer-reviewed literature,Wikipedia,Contacting a colleague in that discipline,Attend a conference		Somewhat difficult	No		Reading peer-reviewed papers from that discipline		Neither easy nor difficult	None	None	None	Several times (x3)	A few times (x2)	I have never needed to do this	Developing [We understand the basics, but much additional science or technique development is required to address some fundamental sources of uncertainty]	Starting [We are just beginning to understand what is going on]	Developing [We understand the basics, but fundamental sources of uncertainty remain]	Within a few years	Sometimes	A lack of access to information,A lack of staff/personnel,Problems in the structure of the management agency (i.e. laws and regulations restrict the management organization or agency in using new science)		A lack of staff/personnel	State GOVERNMENT employee		Early career (1 - 10 yrs)	2021-10-19	White		Male	United States of America
100	964	TRUE	2021-03-10 15:15:30	Less than 10	Less than 10	None	11 to 50	51 and above	Less than 10	Life Science	Wildlife Biology		Moderately familiar	Moderately familiar	Poorly	Yes	Moderately familiar	Regularly reading a particular peer-reviewed journal (or set of journals),Peer-reviewed paper recommendations from others in my field (including via Twitter feeds),Personal communication, i.e. just talking to someone about a field,Non peer-reviewed material, i.e. news articles, websites and blogs		Reading peer-reviewed papers from that discipline,Textbooks, or other education materials		Neither easy nor difficult	No		Google scholar		Neither easy nor difficult	None	None	None	A few times (x2)	Once	I have never needed to do this	I do not know	Developing [We understand the basics, but much additional science or technique development is required to address some fundamental sources of uncertainty]	Developing [We understand the basics, but fundamental sources of uncertainty remain]	>5 years	Sometimes	A lack of access to information,A lack of synthesis,A lack of consensus within the science community		A lack of synthesis	State GOVERNMENT employee		Early career (1 - 10 yrs)	1000 or more	White		Female	United States of America
100	512	TRUE	2021-03-10 15:16:31	Less than 10	11 to 50	Less than 10	11 to 50	11 to 50	11 to 50	Life Science	Aquatic Ecology		Moderately familiar	Very familiar	Moderately well	Yes	Extremely familiar	Personal communication, i.e. just talking to someone about a field		Reading peer-reviewed papers from that discipline		Easy	Yes	Not familiar at all	Google scholar		Neither easy nor difficult	None	1 - 3 papers per year	1 - 3 papers per year	Several times (x3)	Several times (x3)	I have never needed to do this	I do not know	Developing [We understand the basics, but much additional science or technique development is required to address some fundamental sources of uncertainty]	Developing [We understand the basics, but fundamental sources of uncertainty remain]	Within a few years	Sometimes	A lack of synthesis,A lack of consensus within the science community,Problems in the structure of the management agency (i.e. laws and regulations restrict the management organization or agency in using new science)		A lack of consensus within the science community	State GOVERNMENT employee		Early career (1 - 10 yrs)	1000 or more	White		Female	United States of America
100	714	TRUE	2021-03-10 15:17:30	None	Less than 10	None	Less than 10	Less than 10	Less than 10	Life Science	Other	regulatory field	Moderately familiar	Moderately familiar	Poorly	Yes	Slightly familiar	Regularly reading a particular peer-reviewed journal (or set of journals),Peer-reviewed paper recommendations from others in my field (including via Twitter feeds),Professional conferences,Personal communication, i.e. just talking to someone about a field,Non peer-reviewed material, i.e. news articles, websites and blogs		Reading peer-reviewed papers from that discipline,Contacting a colleague in that discipline,Attend a conference,Textbooks, or other education materials		Somewhat difficult	Yes	Slightly familiar	Reading peer-reviewed papers from that discipline		Somewhat difficult	None	None	None	A few times (x2)	A few times (x2)	I have never needed to do this	Developing [We understand the basics, but much additional science or technique development is required to address some fundamental sources of uncertainty]	Developing [We understand the basics, but much additional science or technique development is required to address some fundamental sources of uncertainty]	Developing [We understand the basics, but fundamental sources of uncertainty remain]	>10 years	Sometimes	A lack of access to information,A lack of staff/personnel,Problems in the structure of the management agency (i.e. laws and regulations restrict the management organization or agency in using new science)		Problems in the structure of the management agency (i.e. laws and regulations restrict the management organization or agency in using new science)	State GOVERNMENT employee		Early career (1 - 10 yrs)	250-499	White		Female	United States of America
100	897	TRUE	2021-03-10 15:17:48	11 to 50	11 to 50	None	11 to 50	11 to 50	None	Life Science	Aquatic Ecology		Slightly familiar	Moderately familiar	Moderately well	Yes	Moderately familiar	Ad-hoc through paper reviews or literature reviews for a paper I'm writing,Non peer-reviewed material, i.e. news articles, websites and blogs		Reading peer-reviewed papers from that discipline,Reading synthesis papers from peer-reviewed literature,Contacting a colleague in that discipline		Neither easy nor difficult	No		Google non-peer reviewed material		Somewhat difficult	None	1 - 3 papers per year	None	A few times (x2)	A few times (x2)	Somewhat Challenging	I do not know	I do not know	I do not know	>5 years	I do not know	Too many sources of information,A lack of access to information,Problems in the structure of the management agency (i.e. laws and regulations restrict the management organization or agency in using new science)		Problems in the structure of the management agency (i.e. laws and regulations restrict the management organization or agency in using new science)	State GOVERNMENT employee		Early career (1 - 10 yrs)	1000 or more	White		Female	United States of America
100	1261	TRUE	2021-03-10 15:24:00	Less than 10	11 to 50	Less than 10	Less than 10	11 to 50	Less than 10	Life Science	Fire Ecology		Not familiar at all	Slightly familiar	Poorly	No		Peer-reviewed paper recommendations from others in my field (including via Twitter feeds),Professional conferences,Personal communication, i.e. just talking to someone about a field,Non peer-reviewed material, i.e. news articles, websites and blogs		Reading peer-reviewed papers from that discipline,Reading synthesis papers from peer-reviewed literature,Contacting a colleague in that discipline		Neither easy nor difficult	No		Google non-peer reviewed material		Neither easy nor difficult	None	None	1 - 3 papers per year	A few times (x2)	Once	I have never needed to do this	Advanced [We can quantify the uncertainty and know the driving mechanisms]	Mature [We understand the underlying mechanisms, and have adequate techniques for monitoring, but there are a few areas where improvements are needed]	Mature [We understand the underlying mechanisms, but there is room for improvement]	>5 years	Frequently	Problems in the structure of the management agency (i.e. laws and regulations restrict the management organization or agency in using new science)		Problems in the structure of the management agency (i.e. laws and regulations restrict the management organization or agency in using new science)	State GOVERNMENT employee		Mid career (10 - 20 yrs)	1000 or more	White		Female	United States of America
100	1043	TRUE	2021-03-10 15:27:03	Less than 10	Less than 10	Less than 10	Less than 10	11 to 50	Less than 10	Life Science	Natural Resource Management		Slightly familiar	Slightly familiar	Poorly	Yes	Moderately familiar	Peer-reviewed paper recommendations from others in my field (including via Twitter feeds),Professional conferences,Ad-hoc through paper reviews or literature reviews for a paper I'm writing,Personal communication, i.e. just talking to someone about a field,Non peer-reviewed material, i.e. news articles, websites and blogs		Reading peer-reviewed papers from that discipline,Reading synthesis papers from peer-reviewed literature,Wikipedia,Contacting a colleague in that discipline,Attend a conference		Somewhat difficult	Yes	Moderately familiar	A research network, i.e. the Earth Science Research Network		Somewhat easy	None	1 - 3 papers per year	None	Once	Once	I have never needed to do this	Starting [We are just beginning to understand what is going on]	Developing [We understand the basics, but much additional science or technique development is required to address some fundamental sources of uncertainty]	Developing [We understand the basics, but fundamental sources of uncertainty remain]	Within a few years	I do not know	A lack of access to information,A lack of synthesis,A lack of consensus within the science community,A lack of staff/personnel		A lack of consensus within the science community	State GOVERNMENT employee		Senior (20 yrs +)	1000 or more	White		Female	United States of America
100	694	TRUE	2021-03-10 15:27:49	None	None	None	Less than 10	Less than 10	Less than 10	Earth Science	Remote Sensing		Slightly familiar	Very familiar	Moderately well	Yes	Extremely familiar	Peer-reviewed paper recommendations from others in my field (including via Twitter feeds),Professional conferences		If "other", please tell us what you use:	colleagues	Neither easy nor difficult	Yes	Slightly familiar	Attend a conference		Neither easy nor difficult	None	None	None	Several times (x3)	Several times (x3)	I have never needed to do this	Mature [We understand the underlying mechanisms, and have adequate techniques for monitoring, but there are a few areas where improvements are needed]	Developing [We understand the basics, but much additional science or technique development is required to address some fundamental sources of uncertainty]	Mature [We understand the underlying mechanisms, but there is room for improvement]	Within a few years	Sometimes	Other	not an adopted org tool	Other	State GOVERNMENT employee		Mid career (10 - 20 yrs)	20-49	White		Male	United States of America
100	933	TRUE	2021-03-10 15:28:56	Less than 10	Less than 10	None	11 to 50	11 to 50	None	Life Science	Natural Resource Management		Not familiar at all	Not familiar at all	Moderately well	Yes	Slightly familiar	Professional conferences,Personal communication, i.e. just talking to someone about a field,Non peer-reviewed material, i.e. news articles, websites and blogs		Reading peer-reviewed papers from that discipline,Reading synthesis papers from peer-reviewed literature,Contacting a colleague in that discipline		Somewhat difficult	Yes	Slightly familiar	Google non-peer reviewed material		Somewhat difficult	1 - 3 papers per year	1 - 3 papers per year	1 - 3 papers per year	A few times (x2)	I do not read the peer-reviewed literature	Somewhat Challenging	Mature [We understand the underlying mechanisms, and have adequate techniques for monitoring, but there are a few areas where improvements are needed]	Developing [We understand the basics, but much additional science or technique development is required to address some fundamental sources of uncertainty]	Mature [We understand the underlying mechanisms, but there is room for improvement]	>5 years	Frequently	A lack of synthesis,A lack of staff/personnel,Problems in the structure of the management agency (i.e. laws and regulations restrict the management organization or agency in using new science)		A lack of staff/personnel	State GOVERNMENT employee		Early career (1 - 10 yrs)	1000 or more	White		Female	United States of America
100	68816	TRUE	2021-03-10 15:29:15	None	None	None	Less than 10	Less than 10	None	Earth Science	Natural Resource Management		Slightly familiar	Moderately familiar	Moderately well	No		Professional conferences,Personal communication, i.e. just talking to someone about a field,Non peer-reviewed material, i.e. news articles, websites and blogs		Reading synthesis papers from peer-reviewed literature,Contacting a colleague in that discipline,Attend a conference		Somewhat difficult	No		Contacting a colleague in that discipline		Somewhat difficult	None	None	None	A few times (x2)	Several times (x3)	I have never needed to do this	Developing [We understand the basics, but much additional science or technique development is required to address some fundamental sources of uncertainty]	Developing [We understand the basics, but much additional science or technique development is required to address some fundamental sources of uncertainty]	Mature [We understand the underlying mechanisms, but there is room for improvement]	>5 years	Sometimes	A lack of synthesis,Problems in the structure of the management agency (i.e. laws and regulations restrict the management organization or agency in using new science),Other	managers don't have time to stay on top of science	A lack of staff/personnel	PRIVATE-NOT-FOR-PROFIT, tax-exempt, charitable organization		Early career (1 - 10 yrs)	2021-05-09	White		Female	United States of America
100	480	TRUE	2021-03-10 15:33:06	None	None	None	None	Less than 10	None	Life Science	Wildlife Biology		Slightly familiar	Moderately familiar	Poorly	Yes	Moderately familiar	Peer-reviewed paper recommendations from others in my field (including via Twitter feeds),Professional conferences,Personal communication, i.e. just talking to someone about a field,Non peer-reviewed material, i.e. news articles, websites and blogs		Reading peer-reviewed papers from that discipline,Contacting a colleague in that discipline		Somewhat difficult	Yes	Slightly familiar	Contacting a colleague in that discipline		Somewhat difficult	None	None	None	A few times (x2)	Several times (x3)	I have never needed to do this	Developing [We understand the basics, but much additional science or technique development is required to address some fundamental sources of uncertainty]	Starting [We are just beginning to understand what is going on]	I do not know	>10 years	Frequently	A lack of consensus within the science community,Problems in the structure of the management agency (i.e. laws and regulations restrict the management organization or agency in using new science)		A lack of consensus within the science community	State GOVERNMENT employee		Mid career (10 - 20 yrs)	1000 or more	Prefer not to say		Female	United States of America
100	1848	TRUE	2021-03-10 15:36:01	Less than 10	11 to 50	Less than 10	11 to 50	11 to 50	11 to 50	Life Science	Wildlife Biology		Moderately familiar	Moderately familiar	Moderately well	Yes	Very familiar	Peer-reviewed paper recommendations from others in my field (including via Twitter feeds),Ad-hoc through paper reviews or literature reviews for a paper I'm writing,Non peer-reviewed material, i.e. news articles, websites and blogs		Reading peer-reviewed papers from that discipline,Contacting a colleague in that discipline,Textbooks, or other education materials		Somewhat easy	Yes	Slightly familiar	Google scholar		Somewhat easy	None	1 - 3 papers per year	1 - 3 papers per year	A few times (x2)	A few times (x2)	I have never needed to do this	Mature [We understand the underlying mechanisms, and have adequate techniques for monitoring, but there are a few areas where improvements are needed]	Mature [We understand the underlying mechanisms, and have adequate techniques for monitoring, but there are a few areas where improvements are needed]	Mature [We understand the underlying mechanisms, but there is room for improvement]	>10 years	Sometimes	A lack of synthesis,A lack of consensus within the science community,A lack of staff/personnel,Problems in the structure of the management agency (i.e. laws and regulations restrict the management organization or agency in using new science),Other	Senior level managers resistant to change and infuenced by non-scientific stakeholders	A lack of synthesis	State GOVERNMENT employee		Mid career (10 - 20 yrs)	50-99	White		Female	United States of America
100	478	TRUE	2021-03-10 15:41:27	None	Less than 10	None	None	11 to 50	None	Life Science	Other	Habitat Conservation Planning	Not familiar at all	Slightly familiar	Poorly	No		Ad-hoc through paper reviews or literature reviews for a paper I'm writing,Personal communication, i.e. just talking to someone about a field,Non peer-reviewed material, i.e. news articles, websites and blogs		Reading peer-reviewed papers from that discipline,Reading synthesis papers from peer-reviewed literature,Contacting a colleague in that discipline		Neither easy nor difficult	No		Wikipedia		Neither easy nor difficult	None	None	1 - 3 papers per year	A few times (x2)	A few times (x2)	I have never needed to do this	Developing [We understand the basics, but much additional science or technique development is required to address some fundamental sources of uncertainty]	I do not know	I do not know	>10 years	I do not know	Too many sources of information,A lack of access to information,A lack of synthesis,A lack of staff/personnel		A lack of staff/personnel	State GOVERNMENT employee		Senior (20 yrs +)	250-499	White		Female	United States of America
100	656	TRUE	2021-03-10 15:42:21	11 to 50	11 to 50	Less than 10	11 to 50	11 to 50	Less than 10	Life Science	Natural Resource Management		Moderately familiar	Moderately familiar	Poorly	No		Peer-reviewed paper recommendations from others in my field (including via Twitter feeds),Professional conferences,Personal communication, i.e. just talking to someone about a field,Non peer-reviewed material, i.e. news articles, websites and blogs		Reading peer-reviewed papers from that discipline,Reading synthesis papers from peer-reviewed literature,Google non-peer reviewed material, i.e. news articles, blogs etc.,Attend a conference		Neither easy nor difficult	Yes	Moderately familiar	Reading synthesis papers from peer-reviewed literature		Neither easy nor difficult	None	None	None	A few times (x2)	A few times (x2)	Not Easy; Not Challenging	Mature [We understand the underlying mechanisms, and have adequate techniques for monitoring, but there are a few areas where improvements are needed]	Mature [We understand the underlying mechanisms, and have adequate techniques for monitoring, but there are a few areas where improvements are needed]	Mature [We understand the underlying mechanisms, but there is room for improvement]	>5 years	Sometimes	A lack of synthesis,A lack of consensus within the science community,A lack of staff/personnel,Other	Political resistance and controversy	Problems in the structure of the management agency (i.e. laws and regulations restrict the management organization or agency in using new science)	State GOVERNMENT employee		Mid career (10 - 20 yrs)	1000 or more	White		Male	United States of America
100	648	TRUE	2021-03-10 15:43:05	Less than 10	11 to 50	None	11 to 50	11 to 50	Less than 10	Life Science	Aquatic Ecology		Moderately familiar	Moderately familiar	Poorly	Yes	Very familiar	Peer-reviewed paper recommendations from others in my field (including via Twitter feeds),Professional conferences,Ad-hoc through paper reviews or literature reviews for a paper I'm writing,If "other", please tell us what you use:	Google Scholar Alerts	Reading peer-reviewed papers from that discipline,Reading synthesis papers from peer-reviewed literature,Contacting a colleague in that discipline		Somewhat easy	Yes	Slightly familiar	Google scholar		Neither easy nor difficult	1 - 3 papers per year	1 - 3 papers per year	4 - 12 papers per year	A few times (x2)	A few times (x2)	Somewhat Challenging	Mature [We understand the underlying mechanisms, and have adequate techniques for monitoring, but there are a few areas where improvements are needed]	Developing [We understand the basics, but much additional science or technique development is required to address some fundamental sources of uncertainty]	Mature [We understand the underlying mechanisms, but there is room for improvement]	>5 years	Rarely	A lack of synthesis,A lack of staff/personnel,Problems in the structure of the management agency (i.e. laws and regulations restrict the management organization or agency in using new science),Other	Lack of acceptance/trust of the science by stakeholders and others involved in management of the resource	Problems in the structure of the management agency (i.e. laws and regulations restrict the management organization or agency in using new science)	State GOVERNMENT employee		Early career (1 - 10 yrs)	1000 or more	White		Female	United States of America
100	482	TRUE	2021-03-10 15:44:14	Less than 10	Less than 10	None	11 to 50	11 to 50	None	Life Science	Natural Resource Management		Slightly familiar	Slightly familiar	Poorly	Yes	Slightly familiar	Peer-reviewed paper recommendations from others in my field (including via Twitter feeds),Professional conferences,Non peer-reviewed material, i.e. news articles, websites and blogs		Reading peer-reviewed papers from that discipline,Reading synthesis papers from peer-reviewed literature,Contacting a colleague in that discipline,Attend a conference,Textbooks, or other education materials		Somewhat easy			Google scholar		Neither easy nor difficult	None	None	None	Several times (x3)	A few times (x2)	I have never needed to do this	Developing [We understand the basics, but much additional science or technique development is required to address some fundamental sources of uncertainty]	Starting [We are just beginning to understand what is going on]	Starting [We are just beginning to understand what is going on]	>10 years	Sometimes	A lack of synthesis,A lack of staff/personnel		A lack of staff/personnel	State GOVERNMENT employee		Mid career (10 - 20 yrs)		White		Male	United States of America
100	1142	TRUE	2021-03-10 16:01:39	11 to 50	11 to 50	None	11 to 50	11 to 50		Life Science	Other		Slightly familiar	Moderately familiar	Moderately well	Yes	Moderately familiar	Peer-reviewed paper recommendations from others in my field (including via Twitter feeds),Professional conferences,Personal communication, i.e. just talking to someone about a field,Non peer-reviewed material, i.e. news articles, websites and blogs		Reading peer-reviewed papers from that discipline,Attend a conference,Textbooks, or other education materials,A research network, i.e. the Earth Science Research Network		Somewhat easy	Yes	Moderately familiar	Contacting a colleague in that discipline		Neither easy nor difficult	None	None	None	Once	A few times (x2)	I have never needed to do this	Developing [We understand the basics, but much additional science or technique development is required to address some fundamental sources of uncertainty]	Starting [We are just beginning to understand what is going on]	Starting [We are just beginning to understand what is going on]	>10 years	Sometimes	Problems in the structure of the management agency (i.e. laws and regulations restrict the management organization or agency in using new science)		Problems in the structure of the management agency (i.e. laws and regulations restrict the management organization or agency in using new science)	State GOVERNMENT employee		Early career (1 - 10 yrs)	2021-01-04	White		Female	United States of America
100	1162	TRUE	2021-03-10 16:06:14	Less than 10	Less than 10	None	11 to 50	11 to 50	Less than 10	Earth Science	Other	Watershed Restoration	Moderately familiar	Moderately familiar	Moderately well	No		Peer-reviewed paper recommendations from others in my field (including via Twitter feeds),Professional conferences,Personal communication, i.e. just talking to someone about a field,Non peer-reviewed material, i.e. news articles, websites and blogs		Reading peer-reviewed papers from that discipline,Reading synthesis papers from peer-reviewed literature,Wikipedia,Contacting a colleague in that discipline,Google non-peer reviewed material, i.e. news articles, blogs etc.,Attend a conference,Textbooks, or other education materials		Somewhat easy	Yes	Moderately familiar	Reading peer-reviewed papers from that discipline		Neither easy nor difficult	None	None	None	Several times (x3)	A few times (x2)	I have never needed to do this	Developing [We understand the basics, but much additional science or technique development is required to address some fundamental sources of uncertainty]	Developing [We understand the basics, but much additional science or technique development is required to address some fundamental sources of uncertainty]	Starting [We are just beginning to understand what is going on]	>5 years	Sometimes	A lack of synthesis,A lack of consensus within the science community,A lack of staff/personnel,Problems in the structure of the management agency (i.e. laws and regulations restrict the management organization or agency in using new science),I do not know		A lack of consensus within the science community	State GOVERNMENT employee		Mid career (10 - 20 yrs)	1000 or more	White		Male	United States of America
100	325	TRUE	2021-03-10 16:19:31	None	51 and above	Less than 10	None	51 and above	Less than 10	Life Science	Wildlife Biology		Extremely familiar	Extremely familiar	Moderately well	Yes	Extremely familiar	Regularly reading a particular peer-reviewed journal (or set of journals),Peer-reviewed paper recommendations from others in my field (including via Twitter feeds),Professional conferences,Ad-hoc through paper reviews or literature reviews for a paper I'm writing,Personal communication, i.e. just talking to someone about a field		Reading peer-reviewed papers from that discipline,Reading synthesis papers from peer-reviewed literature,Contacting a colleague in that discipline,Attend a conference,Textbooks, or other education materials		Easy	No		Reading peer-reviewed papers from that discipline		Somewhat easy	1 - 3 papers per year	1 - 3 papers per year	1 - 3 papers per year	A few times (x2)	A few times (x2)	I have never needed to do this	Advanced [We can quantify the uncertainty and know the driving mechanisms]	Advanced [We can quantify the uncertainty and know the driving mechanisms]	Mature [We understand the underlying mechanisms, but there is room for improvement]	>5 years	Sometimes	A lack of synthesis,A lack of staff/personnel,Problems in the structure of the management agency (i.e. laws and regulations restrict the management organization or agency in using new science),Other	Lack of appropriate educational background and training among agency staff	Problems in the structure of the management agency (i.e. laws and regulations restrict the management organization or agency in using new science)	State GOVERNMENT employee		Early career (1 - 10 yrs)	1000 or more	White		Female	United States of America
100	994	TRUE	2021-03-10 16:22:45	Less than 10	Less than 10	Less than 10	Less than 10	Less than 10	Less than 10	Life Science	Wildlife Biology		Slightly familiar	Moderately familiar	Moderately well	Yes	Moderately familiar	Professional conferences,Personal communication, i.e. just talking to someone about a field		Reading peer-reviewed papers from that discipline,Reading synthesis papers from peer-reviewed literature,Contacting a colleague in that discipline,Attend a conference		Somewhat easy	Yes	Slightly familiar	Reading synthesis papers from peer-reviewed literature		Somewhat easy	None	1 - 3 papers per year	1 - 3 papers per year	Once	A few times (x2)	Somewhat Easy	Developing [We understand the basics, but much additional science or technique development is required to address some fundamental sources of uncertainty]	Developing [We understand the basics, but much additional science or technique development is required to address some fundamental sources of uncertainty]	Mature [We understand the underlying mechanisms, but there is room for improvement]	Within a few years	Frequently	Problems in the structure of the management agency (i.e. laws and regulations restrict the management organization or agency in using new science)		Problems in the structure of the management agency (i.e. laws and regulations restrict the management organization or agency in using new science)	State GOVERNMENT employee		Senior (20 yrs +)	250-499	White		Female	United States of America
100	784	TRUE	2021-03-10 16:23:29	Less than 10	11 to 50	Less than 10	11 to 50	51 and above	Less than 10	Life Science	Natural Resource Management		Moderately familiar	Moderately familiar	Moderately well	No		Peer-reviewed paper recommendations from others in my field (including via Twitter feeds),Professional conferences,Ad-hoc through paper reviews or literature reviews for a paper I'm writing,Non peer-reviewed material, i.e. news articles, websites and blogs		Reading peer-reviewed papers from that discipline,Reading synthesis papers from peer-reviewed literature,Contacting a colleague in that discipline,Google non-peer reviewed material, i.e. news articles, blogs etc.		Somewhat easy	No		Google scholar		Neither easy nor difficult	None	None	None	Many times (>4)	A few times (x2)	Challenging	Mature [We understand the underlying mechanisms, and have adequate techniques for monitoring, but there are a few areas where improvements are needed]	Mature [We understand the underlying mechanisms, and have adequate techniques for monitoring, but there are a few areas where improvements are needed]	Developing [We understand the basics, but fundamental sources of uncertainty remain]	>5 years	Sometimes	A lack of synthesis,A lack of staff/personnel		A lack of synthesis	State GOVERNMENT employee		Mid career (10 - 20 yrs)	500-999	White		Male	United States of America
100	335	TRUE	2021-03-10 16:25:34	Less than 10	Less than 10	Less than 10	11 to 50	Less than 10	11 to 50	Social Science	Other	Land Use Planning	Extremely familiar	Extremely familiar	Moderately well	Yes	Extremely familiar	Regularly reading a particular peer-reviewed journal (or set of journals),Peer-reviewed paper recommendations from others in my field (including via Twitter feeds),Professional conferences,Ad-hoc through paper reviews or literature reviews for a paper I'm writing,Personal communication, i.e. just talking to someone about a field,Non peer-reviewed material, i.e. news articles, websites and blogs		Reading peer-reviewed papers from that discipline,Reading synthesis papers from peer-reviewed literature,Contacting a colleague in that discipline		Somewhat easy	Yes	Moderately familiar	Reading peer-reviewed papers from that discipline		Somewhat easy	None	None	None	Once	A few times (x2)	I have never needed to do this	Mature [We understand the underlying mechanisms, and have adequate techniques for monitoring, but there are a few areas where improvements are needed]	Starting [We are just beginning to understand what is going on]	Starting [We are just beginning to understand what is going on]	>10 years	Sometimes	A lack of staff/personnel,Problems in the structure of the management agency (i.e. laws and regulations restrict the management organization or agency in using new science),Other	Politics, money	Other	Local GOVERNMENT employee (city, county, etc.)		Mid career (10 - 20 yrs)	100-249	White		Female	United States of America
100	1003	TRUE	2021-03-10 16:38:16	Less than 10	Less than 10	Less than 10	11 to 50	Less than 10	Less than 10	Earth Science	Water Resource Management		Moderately familiar	Moderately familiar	Poorly	No		Regularly reading a particular peer-reviewed journal (or set of journals),Professional conferences,Personal communication, i.e. just talking to someone about a field,Non peer-reviewed material, i.e. news articles, websites and blogs		Reading peer-reviewed papers from that discipline,Contacting a colleague in that discipline,Google non-peer reviewed material, i.e. news articles, blogs etc.,Textbooks, or other education materials		Neither easy nor difficult	Yes	Slightly familiar	Textbooks, or other educational materials		Neither easy nor difficult	None	None	None	A few times (x2)	A few times (x2)	I have never needed to do this	Developing [We understand the basics, but much additional science or technique development is required to address some fundamental sources of uncertainty]	Developing [We understand the basics, but much additional science or technique development is required to address some fundamental sources of uncertainty]	Developing [We understand the basics, but fundamental sources of uncertainty remain]	I do not know	I do not know	A lack of synthesis,A lack of consensus within the science community,Problems in the structure of the management agency (i.e. laws and regulations restrict the management organization or agency in using new science)		A lack of synthesis	Local GOVERNMENT employee (city, county, etc.)		Senior (20 yrs +)	2021-05-09	Prefer not to say		Prefer not to say	United States of America
100	631	TRUE	2021-03-10 16:44:50		11 to 50	Less than 10	Less than 10	11 to 50	Less than 10	Life Science	Natural Resource Management		Very familiar	Very familiar	Moderately well	Yes	Moderately familiar	Peer-reviewed paper recommendations from others in my field (including via Twitter feeds),Professional conferences		Reading peer-reviewed papers from that discipline,Reading synthesis papers from peer-reviewed literature,Contacting a colleague in that discipline,Attend a conference,Textbooks, or other education materials,A research network, i.e. the Earth Science Research Network		Somewhat easy	Yes	Moderately familiar	Attend a conference		Somewhat easy	None	None	1 - 3 papers per year	A few times (x2)	A few times (x2)	I have never needed to do this	Mature [We understand the underlying mechanisms, and have adequate techniques for monitoring, but there are a few areas where improvements are needed]	Developing [We understand the basics, but much additional science or technique development is required to address some fundamental sources of uncertainty]	Starting [We are just beginning to understand what is going on]	>5 years	Frequently	Problems in the structure of the management agency (i.e. laws and regulations restrict the management organization or agency in using new science),Other	money	Other	State GOVERNMENT employee		Mid career (10 - 20 yrs)	500-999	White		Female	United States of America
100	601	TRUE	2021-03-10 16:57:29	Less than 10	None	None	11 to 50	None	None	Earth Science	Hydrology		Moderately familiar	Moderately familiar	Moderately well	Yes	Moderately familiar	Peer-reviewed paper recommendations from others in my field (including via Twitter feeds),Professional conferences,Personal communication, i.e. just talking to someone about a field,Non peer-reviewed material, i.e. news articles, websites and blogs		Reading peer-reviewed papers from that discipline,Reading synthesis papers from peer-reviewed literature,Contacting a colleague in that discipline,Google non-peer reviewed material, i.e. news articles, blogs etc.,Attend a conference		Neither easy nor difficult	Yes	Slightly familiar	Google scholar		Neither easy nor difficult	None	1 - 3 papers per year	None	Several times (x3)	Several times (x3)	I have never needed to do this	Developing [We understand the basics, but much additional science or technique development is required to address some fundamental sources of uncertainty]	Developing [We understand the basics, but much additional science or technique development is required to address some fundamental sources of uncertainty]	I do not know	>5 years	Frequently	A lack of synthesis,A lack of staff/personnel		A lack of staff/personnel	Federal GOVERNMENT employee		Mid career (10 - 20 yrs)	50-99	White		Male	United States of America
0	329	FALSE	2021-03-10 17:02:06	Less than 10	None	None	Less than 10	Less than 10	Less than 10	Earth Science	Natural Resource Management
100	480	TRUE	2021-03-10 17:20:45	Less than 10	None	None	11 to 50	None	None	Earth Science	Environmental Politics and Policy		Not familiar at all	Not familiar at all	Poorly	Yes	Moderately familiar	Peer-reviewed paper recommendations from others in my field (including via Twitter feeds),Professional conferences,Personal communication, i.e. just talking to someone about a field,Non peer-reviewed material, i.e. news articles, websites and blogs		Contacting a colleague in that discipline		Neither easy nor difficult	No		Contacting a colleague in that discipline		Somewhat difficult	None	None	None	Several times (x3)	A few times (x2)	I have never needed to do this	Mature [We understand the underlying mechanisms, and have adequate techniques for monitoring, but there are a few areas where improvements are needed]	Developing [We understand the basics, but much additional science or technique development is required to address some fundamental sources of uncertainty]	I do not know	Within a few years	Sometimes	A lack of synthesis,Other	How to make it applicable in real-world scenarios	Other	State GOVERNMENT employee		Early career (1 - 10 yrs)	500-999	Vietnamese		Female	United States of America
100	721	TRUE	2021-03-10 17:21:55	Less than 10	Less than 10	11 to 50	Less than 10	Less than 10	11 to 50	Social Science	Natural Resource Management		Moderately familiar	Slightly familiar	Moderately well	Yes	Moderately familiar	Regularly reading a particular peer-reviewed journal (or set of journals),Peer-reviewed paper recommendations from others in my field (including via Twitter feeds),Professional conferences,Personal communication, i.e. just talking to someone about a field,Non peer-reviewed material, i.e. news articles, websites and blogs		Reading peer-reviewed papers from that discipline,Reading synthesis papers from peer-reviewed literature,Contacting a colleague in that discipline,Attend a conference,A research network, i.e. the Earth Science Research Network		Somewhat easy	Yes	Very familiar	Reading peer-reviewed papers from that discipline		Easy	None	None	None	Several times (x3)	Many times (>4)	Somewhat Easy	Mature [We understand the underlying mechanisms, and have adequate techniques for monitoring, but there are a few areas where improvements are needed]	Mature [We understand the underlying mechanisms, and have adequate techniques for monitoring, but there are a few areas where improvements are needed]	Advanced [We understand the driving mechanisms and can quantify cost and risk reasonably accurately]	Within a few months	Frequently	A lack of consensus within the science community,A lack of staff/personnel,Problems in the structure of the management agency (i.e. laws and regulations restrict the management organization or agency in using new science),Other	Personnel with outdated thinking	A lack of staff/personnel	Federal GOVERNMENT employee		Early career (1 - 10 yrs)	2021-10-19	Other (please specify)	Mexican	Female	United States of America
100	671	TRUE	2021-03-10 17:40:03	None	Less than 10	None	Less than 10	Less than 10	None	Life Science	Natural Resource Management		Moderately familiar	Very familiar	Moderately well	Yes	Moderately familiar	Peer-reviewed paper recommendations from others in my field (including via Twitter feeds),Professional conferences,Ad-hoc through paper reviews or literature reviews for a paper I'm writing,Personal communication, i.e. just talking to someone about a field,Non peer-reviewed material, i.e. news articles, websites and blogs		Reading peer-reviewed papers from that discipline,Reading synthesis papers from peer-reviewed literature,Contacting a colleague in that discipline,Attend a conference		Neither easy nor difficult	No		Contacting a colleague in that discipline		Somewhat difficult	None	None	1 - 3 papers per year	Several times (x3)	A few times (x2)	Somewhat Challenging	Starting [We are just beginning to understand what is going on]	Developing [We understand the basics, but much additional science or technique development is required to address some fundamental sources of uncertainty]	Developing [We understand the basics, but fundamental sources of uncertainty remain]	Within a few years	Frequently	Too many sources of information,A lack of consensus within the science community,A lack of staff/personnel,Problems in the structure of the management agency (i.e. laws and regulations restrict the management organization or agency in using new science)		A lack of staff/personnel	State GOVERNMENT employee		Mid career (10 - 20 yrs)	1000 or more	White		Female	United States of America
100	699	TRUE	2021-03-10 17:47:33	Less than 10	Less than 10	Less than 10	11 to 50	11 to 50	Less than 10	Earth Science	Water Resource Management		Moderately familiar	Very familiar	Very well	Yes	Very familiar	Regularly reading a particular peer-reviewed journal (or set of journals),Professional conferences,Ad-hoc through paper reviews or literature reviews for a paper I'm writing,Personal communication, i.e. just talking to someone about a field		Reading peer-reviewed papers from that discipline,Reading synthesis papers from peer-reviewed literature,Textbooks, or other education materials		Easy	Yes	Moderately familiar	Reading peer-reviewed papers from that discipline		Somewhat easy	1 - 3 papers per year	1 - 3 papers per year	1 - 3 papers per year	Several times (x3)	A few times (x2)	I have never needed to do this	Developing [We understand the basics, but much additional science or technique development is required to address some fundamental sources of uncertainty]	Mature [We understand the underlying mechanisms, and have adequate techniques for monitoring, but there are a few areas where improvements are needed]	Mature [We understand the underlying mechanisms, but there is room for improvement]	>5 years	Sometimes	A lack of synthesis,A lack of staff/personnel,Problems in the structure of the management agency (i.e. laws and regulations restrict the management organization or agency in using new science)		Problems in the structure of the management agency (i.e. laws and regulations restrict the management organization or agency in using new science)	PRIVATE-NOT-FOR-PROFIT, tax-exempt, charitable organization		Senior (20 yrs +)	2021-10-19	White		Male	United States of America
100	823	TRUE	2021-03-10 18:12:35	Less than 10	None	None	51 and above	Less than 10	None	Earth Science	Plant Ecology		Slightly familiar	Moderately familiar	Moderately well	Yes	Moderately familiar	Peer-reviewed paper recommendations from others in my field (including via Twitter feeds),Professional conferences,Personal communication, i.e. just talking to someone about a field		Reading peer-reviewed papers from that discipline,Reading synthesis papers from peer-reviewed literature,Attend a conference,Textbooks, or other education materials,A research network, i.e. the Earth Science Research Network		Somewhat difficult	No		Google non-peer reviewed material		Somewhat easy	None	None	None	Many times (>4)	Many times (>4)	I have never needed to do this	Developing [We understand the basics, but much additional science or technique development is required to address some fundamental sources of uncertainty]	Developing [We understand the basics, but much additional science or technique development is required to address some fundamental sources of uncertainty]	Developing [We understand the basics, but fundamental sources of uncertainty remain]	>5 years	Sometimes	A lack of synthesis		Problems in the structure of the management agency (i.e. laws and regulations restrict the management organization or agency in using new science)	State GOVERNMENT employee		Mid career (10 - 20 yrs)	500-999	White		Female	United States of America
100	705	TRUE	2021-03-10 18:55:56	None	Less than 10	None	None	11 to 50	Less than 10	Life Science	Other	Environmental Science (permit writing)	Slightly familiar	Slightly familiar	Poorly	No		Peer-reviewed paper recommendations from others in my field (including via Twitter feeds),Professional conferences,Ad-hoc through paper reviews or literature reviews for a paper I'm writing,Personal communication, i.e. just talking to someone about a field,Non peer-reviewed material, i.e. news articles, websites and blogs		Reading peer-reviewed papers from that discipline,Reading synthesis papers from peer-reviewed literature,Contacting a colleague in that discipline,Textbooks, or other education materials,If "other", please tell us what you use:	biological resources mapping	Somewhat difficult	Yes	Slightly familiar	Reading peer-reviewed papers from that discipline		Somewhat difficult	None	None	None	A few times (x2)	Once	I have never needed to do this	Starting [We are just beginning to understand what is going on]	Developing [We understand the basics, but much additional science or technique development is required to address some fundamental sources of uncertainty]	I do not know	I do not know	I do not know	I do not know		A lack of synthesis	State GOVERNMENT employee		Mid career (10 - 20 yrs)	1000 or more	White		Female	United States of America
78	583	FALSE	2021-03-10 19:27:56		Less than 10		Less than 10	11 to 50		Life Science	Plant Ecology		Moderately familiar	Moderately familiar	Moderately well	Yes	Very familiar	Regularly reading a particular peer-reviewed journal (or set of journals),Peer-reviewed paper recommendations from others in my field (including via Twitter feeds),Professional conferences,Ad-hoc through paper reviews or literature reviews for a paper I'm writing,Personal communication, i.e. just talking to someone about a field,Non peer-reviewed material, i.e. news articles, websites and blogs		Reading peer-reviewed papers from that discipline,Reading synthesis papers from peer-reviewed literature,Contacting a colleague in that discipline,Attend a conference,Textbooks, or other education materials,A research network, i.e. the Earth Science Research Network		Somewhat easy	Yes	Moderately familiar	Contacting a colleague in that discipline		Somewhat easy	None	1 - 3 papers per year	None	A few times (x2)	A few times (x2)	Not Easy; Not Challenging	Mature [We understand the underlying mechanisms, and have adequate techniques for monitoring, but there are a few areas where improvements are needed]	Developing [We understand the basics, but much additional science or technique development is required to address some fundamental sources of uncertainty]	Mature [We understand the underlying mechanisms, but there is room for improvement]	>5 years	Sometimes	A lack of synthesis,A lack of staff/personnel,Problems in the structure of the management agency (i.e. laws and regulations restrict the management organization or agency in using new science)		A lack of staff/personnel
100	382	TRUE	2021-03-10 22:01:50	Less than 10			11 to 50			Earth Science	Water Resource Management		Slightly familiar	Slightly familiar	Poorly	No		Peer-reviewed paper recommendations from others in my field (including via Twitter feeds),Ad-hoc through paper reviews or literature reviews for a paper I'm writing,Personal communication, i.e. just talking to someone about a field		Reading peer-reviewed papers from that discipline,Contacting a colleague in that discipline,Attend a conference		Somewhat difficult	No		Attend a conference		Somewhat difficult	None	1 - 3 papers per year	1 - 3 papers per year	A few times (x2)	A few times (x2)	I have never needed to do this	Developing [We understand the basics, but much additional science or technique development is required to address some fundamental sources of uncertainty]	Mature [We understand the underlying mechanisms, and have adequate techniques for monitoring, but there are a few areas where improvements are needed]	Developing [We understand the basics, but fundamental sources of uncertainty remain]	>5 years	Sometimes	A lack of access to information,A lack of staff/personnel,Problems in the structure of the management agency (i.e. laws and regulations restrict the management organization or agency in using new science)		Problems in the structure of the management agency (i.e. laws and regulations restrict the management organization or agency in using new science)	State GOVERNMENT employee		Senior (20 yrs +)	50-99	White		Male	United States of America
100	461	TRUE	2021-03-10 22:38:23	11 to 50	Less than 10	Less than 10	51 and above	Less than 10	Less than 10	Earth Science	Hydrology		Moderately familiar	Moderately familiar	Poorly	Yes	Very familiar	Regularly reading a particular peer-reviewed journal (or set of journals),Peer-reviewed paper recommendations from others in my field (including via Twitter feeds),Professional conferences,Ad-hoc through paper reviews or literature reviews for a paper I'm writing,If "other", please tell us what you use:	lab journal review process	Reading peer-reviewed papers from that discipline,Reading synthesis papers from peer-reviewed literature,Contacting a colleague in that discipline,Attend a conference,Textbooks, or other education materials		Neither easy nor difficult	Yes	Slightly familiar	Reading peer-reviewed papers from that discipline		Neither easy nor difficult	1 - 3 papers per year	4 - 12 papers per year	13 - 49 papers per year	A few times (x2)	A few times (x2)	Somewhat Challenging	Developing [We understand the basics, but much additional science or technique development is required to address some fundamental sources of uncertainty]	Mature [We understand the underlying mechanisms, and have adequate techniques for monitoring, but there are a few areas where improvements are needed]	I do not know	I do not know	Rarely	A lack of staff/personnel,Other	training	A lack of staff/personnel	ACADEMIC		Mid career (10 - 20 yrs)	1000 or more	White		Female	United States of America
100	1236	TRUE	2021-03-10 23:42:16	11 to 50	Less than 10	11 to 50	11 to 50	Less than 10	11 to 50	Earth Science	Natural Resource Management		Moderately familiar	Moderately familiar	Moderately well	Yes	Very familiar	If "other", please tell us what you use:	internal email within the department	Textbooks, or other education materials		Somewhat easy	Yes	Very familiar	Wikipedia		Somewhat easy	None	None	None	Once	Once	Not Easy; Not Challenging	Mature [We understand the underlying mechanisms, and have adequate techniques for monitoring, but there are a few areas where improvements are needed]	Advanced [We can quantify the uncertainty and know the driving mechanisms]	Advanced [We understand the driving mechanisms and can quantify cost and risk reasonably accurately]	Within a few months	Frequently	A lack of staff/personnel,Problems in the structure of the management agency (i.e. laws and regulations restrict the management organization or agency in using new science)		A lack of staff/personnel	State GOVERNMENT employee		Early career (1 - 10 yrs)	20-49	White		Male	United States of America
100	697	TRUE	2021-03-11 07:22:13		Less than 10			Less than 10		Life Science	Wildlife Biology		Slightly familiar	Slightly familiar	Poorly	No		Personal communication, i.e. just talking to someone about a field		Google non-peer reviewed material, i.e. news articles, blogs etc.		Somewhat easy	No		Reading synthesis papers from peer-reviewed literature		Somewhat easy	None	None	None	A few times (x2)	A few times (x2)	Somewhat Easy	Developing [We understand the basics, but much additional science or technique development is required to address some fundamental sources of uncertainty]	Developing [We understand the basics, but much additional science or technique development is required to address some fundamental sources of uncertainty]	Developing [We understand the basics, but fundamental sources of uncertainty remain]	Within a few years	Frequently	Problems in the structure of the management agency (i.e. laws and regulations restrict the management organization or agency in using new science)		Problems in the structure of the management agency (i.e. laws and regulations restrict the management organization or agency in using new science)	RETIRED	Local GOVERNMENT employee (city, county, etc.)	Senior (20 yrs +)	50-99	White		Female	United States of America
100	897	TRUE	2021-03-11 08:41:05	None	11 to 50	None	None	11 to 50	None	Life Science	Aquatic Ecology		Moderately familiar	Moderately familiar	Moderately well	Yes	Very familiar	Regularly reading a particular peer-reviewed journal (or set of journals),Professional conferences,Ad-hoc through paper reviews or literature reviews for a paper I'm writing,Personal communication, i.e. just talking to someone about a field,Non peer-reviewed material, i.e. news articles, websites and blogs		Reading peer-reviewed papers from that discipline,Reading synthesis papers from peer-reviewed literature,Contacting a colleague in that discipline,Attend a conference,Textbooks, or other education materials		Easy	No		Reading synthesis papers from peer-reviewed literature		Somewhat easy	1 - 3 papers per year	None	4 - 12 papers per year	A few times (x2)	A few times (x2)	I have never needed to do this	Developing [We understand the basics, but much additional science or technique development is required to address some fundamental sources of uncertainty]	Mature [We understand the underlying mechanisms, and have adequate techniques for monitoring, but there are a few areas where improvements are needed]	Starting [We are just beginning to understand what is going on]	>5 years	Sometimes	A lack of synthesis,A lack of staff/personnel		A lack of staff/personnel	State GOVERNMENT employee		Mid career (10 - 20 yrs)	2021-05-09	White		Male	United States of America
100	615	TRUE	2021-03-11 09:10:57	11 to 50	11 to 50	Less than 10	11 to 50	11 to 50	Less than 10	Life Science	Aquatic Ecology		Extremely familiar	Extremely familiar	Moderately well	Yes	Extremely familiar	Regularly reading a particular peer-reviewed journal (or set of journals)		Reading peer-reviewed papers from that discipline		Easy	Yes	Very familiar	Reading synthesis papers from peer-reviewed literature		Somewhat easy	1 - 3 papers per year	1 - 3 papers per year	1 - 3 papers per year	A few times (x2)	A few times (x2)	Not Easy; Not Challenging	Developing [We understand the basics, but much additional science or technique development is required to address some fundamental sources of uncertainty]	Developing [We understand the basics, but much additional science or technique development is required to address some fundamental sources of uncertainty]	Starting [We are just beginning to understand what is going on]	Within a few years	Frequently	A lack of staff/personnel			State GOVERNMENT employee		Mid career (10 - 20 yrs)	100-249	White		Male	United States of America
100	490	TRUE	2021-03-11 09:16:21	Less than 10	Less than 10		Less than 10	Less than 10		Earth Science	Natural Resource Management		Very familiar	Very familiar	Moderately well	Yes	Very familiar	Peer-reviewed paper recommendations from others in my field (including via Twitter feeds),Professional conferences,Ad-hoc through paper reviews or literature reviews for a paper I'm writing,Personal communication, i.e. just talking to someone about a field		Reading peer-reviewed papers from that discipline,Reading synthesis papers from peer-reviewed literature,Contacting a colleague in that discipline		Somewhat easy	Yes	Moderately familiar	Contacting a colleague in that discipline		Neither easy nor difficult	None	None	None	Several times (x3)	A few times (x2)	Somewhat Challenging	Advanced [We can quantify the uncertainty and know the driving mechanisms]	Developing [We understand the basics, but much additional science or technique development is required to address some fundamental sources of uncertainty]	Developing [We understand the basics, but fundamental sources of uncertainty remain]	>5 years	Sometimes	A lack of staff/personnel		A lack of staff/personnel	Federal GOVERNMENT employee		Mid career (10 - 20 yrs)	100-249	White		Female	United States of America
100	625	TRUE	2021-03-11 09:32:28	11 to 50	Less than 10	11 to 50	11 to 50	11 to 50	11 to 50	Earth Science	Water Resource Management		Not familiar at all	Moderately familiar	Poorly	Yes	Slightly familiar	Peer-reviewed paper recommendations from others in my field (including via Twitter feeds),Professional conferences,Ad-hoc through paper reviews or literature reviews for a paper I'm writing		Reading peer-reviewed papers from that discipline,Reading synthesis papers from peer-reviewed literature,Textbooks, or other education materials		Neither easy nor difficult	Yes	Slightly familiar	Reading peer-reviewed papers from that discipline		Neither easy nor difficult	1 - 3 papers per year	1 - 3 papers per year	None	Several times (x3)	Several times (x3)	I have never needed to do this	Mature [We understand the underlying mechanisms, and have adequate techniques for monitoring, but there are a few areas where improvements are needed]	Mature [We understand the underlying mechanisms, and have adequate techniques for monitoring, but there are a few areas where improvements are needed]	Advanced [We understand the driving mechanisms and can quantify cost and risk reasonably accurately]	>5 years	Sometimes	Too many sources of information,A lack of access to information,Problems in the structure of the management agency (i.e. laws and regulations restrict the management organization or agency in using new science)		Problems in the structure of the management agency (i.e. laws and regulations restrict the management organization or agency in using new science)	PRIVATE-NOT-FOR-PROFIT, tax-exempt, charitable organization		Early career (1 - 10 yrs)	2021-10-19	White		Female	United States of America
100	800	TRUE	2021-03-11 09:34:33	Less than 10	None	None	11 to 50	None	None	Earth Science	Sustainability Science		Moderately familiar	Moderately familiar	Poorly	Yes	Moderately familiar	Professional conferences		Reading peer-reviewed papers from that discipline,Attend a conference,Textbooks, or other education materials,A research network, i.e. the Earth Science Research Network		Neither easy nor difficult	Yes	Moderately familiar	Attend a conference		Neither easy nor difficult	None	None	None	I do not read the peer-reviewed literature	I do not read the peer-reviewed literature	I have never needed to do this	Mature [We understand the underlying mechanisms, and have adequate techniques for monitoring, but there are a few areas where improvements are needed]	Developing [We understand the basics, but much additional science or technique development is required to address some fundamental sources of uncertainty]	Developing [We understand the basics, but fundamental sources of uncertainty remain]	Within a few years	Frequently	Too many sources of information,A lack of consensus within the science community,Problems in the structure of the management agency (i.e. laws and regulations restrict the management organization or agency in using new science)		A lack of consensus within the science community	Local GOVERNMENT employee (city, county, etc.)		Senior (20 yrs +)	50-99	American Indian or Alaska Native		Male	United States of America
100	564	TRUE	2021-03-11 10:35:28	None	11 to 50	None	None	51 and above	Less than 10	Life Science	Wildlife Biology		Moderately familiar	Very familiar	Moderately well	Yes	Extremely familiar	Peer-reviewed paper recommendations from others in my field (including via Twitter feeds),Professional conferences,Ad-hoc through paper reviews or literature reviews for a paper I'm writing,Personal communication, i.e. just talking to someone about a field,Non peer-reviewed material, i.e. news articles, websites and blogs,If "other", please tell us what you use:	Google scholar keyword updates	Reading peer-reviewed papers from that discipline,Reading synthesis papers from peer-reviewed literature,Contacting a colleague in that discipline		Somewhat easy	Yes	Moderately familiar	Google scholar		Neither easy nor difficult	1 - 3 papers per year	4 - 12 papers per year	4 - 12 papers per year	A few times (x2)	A few times (x2)	I have never needed to do this	Mature [We understand the underlying mechanisms, and have adequate techniques for monitoring, but there are a few areas where improvements are needed]	Developing [We understand the basics, but much additional science or technique development is required to address some fundamental sources of uncertainty]	Mature [We understand the underlying mechanisms, but there is room for improvement]	Within a few years	Sometimes	A lack of access to information,A lack of synthesis,A lack of staff/personnel,Problems in the structure of the management agency (i.e. laws and regulations restrict the management organization or agency in using new science)		A lack of access to information	State GOVERNMENT employee		Mid career (10 - 20 yrs)	1000 or more	White		Female	United States of America
100	1226	TRUE	2021-03-11 11:24:21	11 to 50	None	None	11 to 50	None	Less than 10	Earth Science	Natural Resource Management		Slightly familiar	Moderately familiar	Poorly	Yes	Moderately familiar	Regularly reading a particular peer-reviewed journal (or set of journals),Peer-reviewed paper recommendations from others in my field (including via Twitter feeds),Personal communication, i.e. just talking to someone about a field		Reading peer-reviewed papers from that discipline,Reading synthesis papers from peer-reviewed literature,Textbooks, or other education materials,If "other", please tell us what you use:	Agency handbooks and Specialist Reports	Neither easy nor difficult	No		Google scholar		Somewhat difficult	None	None	None	A few times (x2)	A few times (x2)	Somewhat Challenging	Mature [We understand the underlying mechanisms, and have adequate techniques for monitoring, but there are a few areas where improvements are needed]	Starting [We are just beginning to understand what is going on]	I do not know	>5 years	Sometimes	Problems in the structure of the management agency (i.e. laws and regulations restrict the management organization or agency in using new science),Other	It is difficult to apply small scale research project to landscape level management (money, time, lack of personal), and Modeling tools are not accurate enough but we are constantly making management decisions from them.	Other	Federal GOVERNMENT employee		Early career (1 - 10 yrs)	20-49	White		Female	United States of America
100	854	TRUE	2021-03-11 11:25:35	11 to 50	Less than 10	None	51 and above	Less than 10	Less than 10	Earth Science	Natural Resource Management		Slightly familiar	Moderately familiar	Moderately well	Yes	Moderately familiar	Peer-reviewed paper recommendations from others in my field (including via Twitter feeds),Professional conferences		Reading peer-reviewed papers from that discipline,Reading synthesis papers from peer-reviewed literature,Attend a conference		Somewhat easy	Yes	Slightly familiar	Attend a conference		Neither easy nor difficult	None	None	None	Several times (x3)	Several times (x3)	Somewhat Challenging	Mature [We understand the underlying mechanisms, and have adequate techniques for monitoring, but there are a few areas where improvements are needed]	Mature [We understand the underlying mechanisms, and have adequate techniques for monitoring, but there are a few areas where improvements are needed]	Developing [We understand the basics, but fundamental sources of uncertainty remain]	Within a few months	Sometimes	A lack of access to information,A lack of staff/personnel,Problems in the structure of the management agency (i.e. laws and regulations restrict the management organization or agency in using new science)		A lack of access to information	Federal GOVERNMENT employee		Mid career (10 - 20 yrs)	2021-10-19	White			United States of America
100	3163	TRUE	2021-03-11 11:28:15	11 to 50	None	Less than 10	51 and above	Less than 10	Less than 10	Earth Science	Water Resource Management		Moderately familiar	Very familiar	Moderately well	Yes	Very familiar	Regularly reading a particular peer-reviewed journal (or set of journals),Peer-reviewed paper recommendations from others in my field (including via Twitter feeds),Professional conferences,Ad-hoc through paper reviews or literature reviews for a paper I'm writing,Non peer-reviewed material, i.e. news articles, websites and blogs		Reading peer-reviewed papers from that discipline,Reading synthesis papers from peer-reviewed literature,Contacting a colleague in that discipline,Google non-peer reviewed material, i.e. news articles, blogs etc.,Attend a conference,A research network, i.e. the Earth Science Research Network		Somewhat easy	Yes	Very familiar	Reading peer-reviewed papers from that discipline		Neither easy nor difficult	1 - 3 papers per year	1 - 3 papers per year	1 - 3 papers per year	A few times (x2)	A few times (x2)	Challenging	Mature [We understand the underlying mechanisms, and have adequate techniques for monitoring, but there are a few areas where improvements are needed]	Mature [We understand the underlying mechanisms, and have adequate techniques for monitoring, but there are a few areas where improvements are needed]	Starting [We are just beginning to understand what is going on]	>10 years	Sometimes	A lack of access to information,A lack of synthesis,A lack of staff/personnel,Other	Not enough funding to try out new science in physical areas that have not yet been included in suite of new science. This is basically the lack of funding resources to do pilot studies to see if new science and methods work in your managed area, so this is a barrier to incorporating new methods into standard practice and application.	A lack of staff/personnel	Local GOVERNMENT employee (city, county, etc.)		Early career (1 - 10 yrs)	2021-10-19	White		Female	United States of America
100	357	TRUE	2021-03-11 11:30:30								Fire Ecology		Slightly familiar	Slightly familiar	Poorly	No		Professional conferences,Ad-hoc through paper reviews or literature reviews for a paper I'm writing,Personal communication, i.e. just talking to someone about a field,Non peer-reviewed material, i.e. news articles, websites and blogs,If "other", please tell us what you use:	Research Briefs	Reading peer-reviewed papers from that discipline,Reading synthesis papers from peer-reviewed literature,Contacting a colleague in that discipline,If "other", please tell us what you use:	Peers	Neither easy nor difficult	No		Google scholar		Somewhat difficult	None	None	None	A few times (x2)	A few times (x2)	I have never needed to do this	Developing [We understand the basics, but much additional science or technique development is required to address some fundamental sources of uncertainty]	I do not know	I do not know	>5 years	Frequently	A lack of synthesis,A lack of staff/personnel,Problems in the structure of the management agency (i.e. laws and regulations restrict the management organization or agency in using new science)		Problems in the structure of the management agency (i.e. laws and regulations restrict the management organization or agency in using new science)	State GOVERNMENT employee		Early career (1 - 10 yrs)	1000 or more	White		Male	United States of America
100	561	TRUE	2021-03-11 11:33:50	51 and above	None	Less than 10	51 and above	None	Less than 10	Earth Science	Hydrology		Moderately familiar	Very familiar	Moderately well	Yes	Very familiar	Ad-hoc through paper reviews or literature reviews for a paper I'm writing,Non peer-reviewed material, i.e. news articles, websites and blogs,If "other", please tell us what you use:	Google Scholar alerts for specific hydrology interests relevant to my research	Reading peer-reviewed papers from that discipline,Reading synthesis papers from peer-reviewed literature,Contacting a colleague in that discipline,Attend a conference,Textbooks, or other education materials		Somewhat difficult	Yes	Moderately familiar	Reading synthesis papers from peer-reviewed literature		Somewhat difficult	1 - 3 papers per year	1 - 3 papers per year	4 - 12 papers per year	Once	Several times (x3)	Somewhat Challenging	Developing [We understand the basics, but much additional science or technique development is required to address some fundamental sources of uncertainty]	Mature [We understand the underlying mechanisms, and have adequate techniques for monitoring, but there are a few areas where improvements are needed]	Starting [We are just beginning to understand what is going on]	>5 years	Sometimes	A lack of synthesis,Problems in the structure of the management agency (i.e. laws and regulations restrict the management organization or agency in using new science)		Problems in the structure of the management agency (i.e. laws and regulations restrict the management organization or agency in using new science)	ACADEMIC		Early career (1 - 10 yrs)	20-49	White		Female	United States of America
100	833	TRUE	2021-03-11 11:43:36	Less than 10	51 and above	Less than 10	Less than 10	11 to 50	Less than 10	Life Science	Aquatic Ecology		Very familiar	Moderately familiar	Moderately well	Yes	Very familiar	Personal communication, i.e. just talking to someone about a field		Reading peer-reviewed papers from that discipline		Somewhat easy	Yes	Slightly familiar	Google scholar		Neither easy nor difficult	None	None	None	A few times (x2)	Many times (>4)	I have never needed to do this	Developing [We understand the basics, but much additional science or technique development is required to address some fundamental sources of uncertainty]	Mature [We understand the underlying mechanisms, and have adequate techniques for monitoring, but there are a few areas where improvements are needed]	Developing [We understand the basics, but fundamental sources of uncertainty remain]	>5 years	Sometimes	A lack of staff/personnel,Problems in the structure of the management agency (i.e. laws and regulations restrict the management organization or agency in using new science)		Problems in the structure of the management agency (i.e. laws and regulations restrict the management organization or agency in using new science)	State GOVERNMENT employee		Early career (1 - 10 yrs)	100-249	Other (please specify)	Hispanic (Mexican)	Female	United States of America
100	593	TRUE	2021-03-11 11:44:44	Less than 10	Less than 10	None	Less than 10	11 to 50	None	Life Science	Aquatic Ecology		Slightly familiar	Moderately familiar	Poorly	Yes	Moderately familiar	Ad-hoc through paper reviews or literature reviews for a paper I'm writing		Reading peer-reviewed papers from that discipline,Reading synthesis papers from peer-reviewed literature,Contacting a colleague in that discipline		Somewhat easy	Yes	Moderately familiar	Contacting a colleague in that discipline		Somewhat easy	None	None	None	A few times (x2)	A few times (x2)	Somewhat Challenging	Mature [We understand the underlying mechanisms, and have adequate techniques for monitoring, but there are a few areas where improvements are needed]	Mature [We understand the underlying mechanisms, and have adequate techniques for monitoring, but there are a few areas where improvements are needed]	Developing [We understand the basics, but fundamental sources of uncertainty remain]	>5 years	Sometimes	Too many sources of information,A lack of access to information,A lack of synthesis,A lack of consensus within the science community,A lack of staff/personnel,Problems in the structure of the management agency (i.e. laws and regulations restrict the management organization or agency in using new science)		A lack of staff/personnel	State GOVERNMENT employee		Early career (1 - 10 yrs)	20-49	Prefer not to say		Female	United States of America
100	1768	TRUE	2021-03-11 11:47:32	Less than 10	51 and above	11 to 50	Less than 10	51 and above	11 to 50	Life Science	Plant Ecology		Moderately familiar	Very familiar	Moderately well	Yes	Very familiar	Peer-reviewed paper recommendations from others in my field (including via Twitter feeds),Ad-hoc through paper reviews or literature reviews for a paper I'm writing		Reading peer-reviewed papers from that discipline,Reading synthesis papers from peer-reviewed literature,Contacting a colleague in that discipline,Google non-peer reviewed material, i.e. news articles, blogs etc.,Textbooks, or other education materials		Somewhat easy	No		Reading synthesis papers from peer-reviewed literature		Somewhat easy	None	1 - 3 papers per year	1 - 3 papers per year	A few times (x2)	Several times (x3)	I have never needed to do this	I do not know	I do not know	Developing [We understand the basics, but fundamental sources of uncertainty remain]	>10 years	Sometimes	A lack of staff/personnel,Problems in the structure of the management agency (i.e. laws and regulations restrict the management organization or agency in using new science)		Problems in the structure of the management agency (i.e. laws and regulations restrict the management organization or agency in using new science)	ACADEMIC		Early career (1 - 10 yrs)	1000 or more	White		Female	United States of America
100	607	TRUE	2021-03-11 12:01:48	Less than 10	11 to 50	None	Less than 10	11 to 50	None	Life Science	Wildlife Biology		Slightly familiar	Moderately familiar	Moderately well	Yes	Extremely familiar	Peer-reviewed paper recommendations from others in my field (including via Twitter feeds),Professional conferences,Ad-hoc through paper reviews or literature reviews for a paper I'm writing,Personal communication, i.e. just talking to someone about a field,Non peer-reviewed material, i.e. news articles, websites and blogs		Reading peer-reviewed papers from that discipline,Reading synthesis papers from peer-reviewed literature,Contacting a colleague in that discipline,Attend a conference		Neither easy nor difficult	Yes	Slightly familiar	Reading peer-reviewed papers from that discipline		Neither easy nor difficult	1 - 3 papers per year	1 - 3 papers per year	1 - 3 papers per year	A few times (x2)	A few times (x2)	I have never needed to do this	I do not know	Mature [We understand the underlying mechanisms, and have adequate techniques for monitoring, but there are a few areas where improvements are needed]	Mature [We understand the underlying mechanisms, but there is room for improvement]	>5 years	Rarely	Too many sources of information,A lack of synthesis,A lack of consensus within the science community,A lack of staff/personnel,Problems in the structure of the management agency (i.e. laws and regulations restrict the management organization or agency in using new science)		Problems in the structure of the management agency (i.e. laws and regulations restrict the management organization or agency in using new science)	State GOVERNMENT employee		Mid career (10 - 20 yrs)	2021-05-09	White		Female	United States of America
100	389	TRUE	2021-03-11 12:12:43	Less than 10	Less than 10	None	Less than 10	Less than 10	None	Life Science	Natural Resource Management		Moderately familiar	Moderately familiar	Moderately well	Yes	Very familiar	Peer-reviewed paper recommendations from others in my field (including via Twitter feeds),Ad-hoc through paper reviews or literature reviews for a paper I'm writing,Personal communication, i.e. just talking to someone about a field,Non peer-reviewed material, i.e. news articles, websites and blogs		Reading peer-reviewed papers from that discipline,Reading synthesis papers from peer-reviewed literature,Contacting a colleague in that discipline,Google non-peer reviewed material, i.e. news articles, blogs etc.,Textbooks, or other education materials		Somewhat easy	No		Google non-peer reviewed material		Somewhat easy	None	None	None	A few times (x2)	A few times (x2)	I have never needed to do this	Developing [We understand the basics, but much additional science or technique development is required to address some fundamental sources of uncertainty]	Mature [We understand the underlying mechanisms, and have adequate techniques for monitoring, but there are a few areas where improvements are needed]	Mature [We understand the underlying mechanisms, but there is room for improvement]	Within a few months	I do not know	A lack of staff/personnel		A lack of staff/personnel	State GOVERNMENT employee		Early career (1 - 10 yrs)	1000 or more	Chinese		Female	United States of America
100	536	TRUE	2021-03-11 12:18:22	11 to 50	None	Less than 10	11 to 50	Less than 10	Less than 10	Earth Science	Wildlife Biology		Slightly familiar	Moderately familiar	Moderately well	Yes	Moderately familiar	Regularly reading a particular peer-reviewed journal (or set of journals),Professional conferences,Personal communication, i.e. just talking to someone about a field		Reading peer-reviewed papers from that discipline,Reading synthesis papers from peer-reviewed literature,Contacting a colleague in that discipline,Attend a conference,Textbooks, or other education materials,A research network, i.e. the Earth Science Research Network		Somewhat easy	Yes	Very familiar	Reading synthesis papers from peer-reviewed literature		Somewhat easy	None	1 - 3 papers per year	1 - 3 papers per year	A few times (x2)	A few times (x2)	I have never needed to do this	Mature [We understand the underlying mechanisms, and have adequate techniques for monitoring, but there are a few areas where improvements are needed]	Mature [We understand the underlying mechanisms, and have adequate techniques for monitoring, but there are a few areas where improvements are needed]	Developing [We understand the basics, but fundamental sources of uncertainty remain]	Within a few years	Frequently	Too many sources of information,A lack of access to information,A lack of staff/personnel,Other	Funding	Problems in the structure of the management agency (i.e. laws and regulations restrict the management organization or agency in using new science)	State GOVERNMENT employee		Mid career (10 - 20 yrs)	1000 or more	White		Male	United States of America
100	789	TRUE	2021-03-11 12:23:51	None	11 to 50	Less than 10	Less than 10	51 and above	Less than 10	Life Science	Wildlife Biology		Slightly familiar	Moderately familiar	Moderately well	Yes	Very familiar	Peer-reviewed paper recommendations from others in my field (including via Twitter feeds),Professional conferences,Ad-hoc through paper reviews or literature reviews for a paper I'm writing,Personal communication, i.e. just talking to someone about a field,Non peer-reviewed material, i.e. news articles, websites and blogs		Reading peer-reviewed papers from that discipline,Reading synthesis papers from peer-reviewed literature,Contacting a colleague in that discipline,A research network, i.e. the Earth Science Research Network		Somewhat easy	Yes	Moderately familiar	Google scholar		Somewhat easy	1 - 3 papers per year	1 - 3 papers per year	1 - 3 papers per year	Many times (>4)	A few times (x2)	Somewhat Challenging	Mature [We understand the underlying mechanisms, and have adequate techniques for monitoring, but there are a few areas where improvements are needed]	I do not know	Developing [We understand the basics, but fundamental sources of uncertainty remain]	I do not know	Sometimes	Too many sources of information,A lack of access to information,A lack of staff/personnel,Problems in the structure of the management agency (i.e. laws and regulations restrict the management organization or agency in using new science)		I do not know	ACADEMIC		Early career (1 - 10 yrs)	1000 or more	White		Female	United States of America
100	362	TRUE	2021-03-11 12:41:32	None	Less than 10	Less than 10	Less than 10	11 to 50	11 to 50	Life Science	Natural Resource Management		Moderately familiar	Moderately familiar	Moderately well	Yes	Very familiar	Peer-reviewed paper recommendations from others in my field (including via Twitter feeds),Ad-hoc through paper reviews or literature reviews for a paper I'm writing,Personal communication, i.e. just talking to someone about a field,Non peer-reviewed material, i.e. news articles, websites and blogs		Reading peer-reviewed papers from that discipline,Reading synthesis papers from peer-reviewed literature,Contacting a colleague in that discipline		Somewhat easy	Yes	Moderately familiar	Reading peer-reviewed papers from that discipline		Somewhat difficult	None	1 - 3 papers per year	1 - 3 papers per year	Several times (x3)	Several times (x3)	I have never needed to do this	Developing [We understand the basics, but much additional science or technique development is required to address some fundamental sources of uncertainty]	Developing [We understand the basics, but much additional science or technique development is required to address some fundamental sources of uncertainty]	I do not know	Within a few years	I do not know	Too many sources of information,A lack of synthesis,Problems in the structure of the management agency (i.e. laws and regulations restrict the management organization or agency in using new science)		Problems in the structure of the management agency (i.e. laws and regulations restrict the management organization or agency in using new science)	Federal GOVERNMENT employee		Early career (1 - 10 yrs)	2021-01-04	White		Female	United States of America
100	604	TRUE	2021-03-11 12:49:11	Less than 10	Less than 10	None	Less than 10	Less than 10	None	Life Science	Wildlife Biology		Slightly familiar	Slightly familiar	Moderately well	Yes	Moderately familiar	Peer-reviewed paper recommendations from others in my field (including via Twitter feeds),Personal communication, i.e. just talking to someone about a field,Non peer-reviewed material, i.e. news articles, websites and blogs		Reading peer-reviewed papers from that discipline,Contacting a colleague in that discipline		Neither easy nor difficult	Yes	Not familiar at all	Google non-peer reviewed material		Somewhat difficult	None	1 - 3 papers per year	None	A few times (x2)	A few times (x2)	I have never needed to do this	Mature [We understand the underlying mechanisms, and have adequate techniques for monitoring, but there are a few areas where improvements are needed]	Developing [We understand the basics, but much additional science or technique development is required to address some fundamental sources of uncertainty]	Starting [We are just beginning to understand what is going on]	Within a few years	Sometimes	A lack of access to information,A lack of staff/personnel,Problems in the structure of the management agency (i.e. laws and regulations restrict the management organization or agency in using new science)		A lack of staff/personnel	State GOVERNMENT employee		Mid career (10 - 20 yrs)	1000 or more	White		Non-binary / third gender	United States of America
100	434	TRUE	2021-03-11 13:08:56	Less than 10	Less than 10	Less than 10	11 to 50	11 to 50	11 to 50	Social Science	Environmental Politics and Policy		Slightly familiar	Moderately familiar	Moderately well	Yes	Very familiar	Peer-reviewed paper recommendations from others in my field (including via Twitter feeds),Professional conferences,Personal communication, i.e. just talking to someone about a field,Non peer-reviewed material, i.e. news articles, websites and blogs		Reading synthesis papers from peer-reviewed literature,Contacting a colleague in that discipline,Google non-peer reviewed material, i.e. news articles, blogs etc.,Attend a conference,Textbooks, or other education materials		Neither easy nor difficult	Yes	Very familiar	Google non-peer reviewed material		Neither easy nor difficult	None	None	None	Once	Once	I have never needed to do this	Developing [We understand the basics, but much additional science or technique development is required to address some fundamental sources of uncertainty]	Developing [We understand the basics, but much additional science or technique development is required to address some fundamental sources of uncertainty]	Developing [We understand the basics, but fundamental sources of uncertainty remain]	Within a few years	Sometimes	Too many sources of information,A lack of synthesis,A lack of consensus within the science community,Problems in the structure of the management agency (i.e. laws and regulations restrict the management organization or agency in using new science)		A lack of synthesis	PRIVATE-NOT-FOR-PROFIT, tax-exempt, charitable organization		Mid career (10 - 20 yrs)	2021-05-09	White		Male	United States of America
100	1747	TRUE	2021-03-11 13:10:22	Less than 10	11 to 50	Less than 10	Less than 10	11 to 50	11 to 50	Life Science	Plant Ecology		Moderately familiar	Very familiar	Moderately well	Yes	Very familiar	Peer-reviewed paper recommendations from others in my field (including via Twitter feeds),Professional conferences,Ad-hoc through paper reviews or literature reviews for a paper I'm writing,Personal communication, i.e. just talking to someone about a field		Reading peer-reviewed papers from that discipline,Reading synthesis papers from peer-reviewed literature,Contacting a colleague in that discipline,A research network, i.e. the Earth Science Research Network		Somewhat difficult	Yes	Slightly familiar	Contacting a colleague in that discipline		Somewhat difficult	None	1 - 3 papers per year	None	A few times (x2)	A few times (x2)	Challenging	Mature [We understand the underlying mechanisms, and have adequate techniques for monitoring, but there are a few areas where improvements are needed]	Mature [We understand the underlying mechanisms, and have adequate techniques for monitoring, but there are a few areas where improvements are needed]	Developing [We understand the basics, but fundamental sources of uncertainty remain]	Within a few years	Sometimes	A lack of staff/personnel,Problems in the structure of the management agency (i.e. laws and regulations restrict the management organization or agency in using new science),Other	Hesitancy to change practices. Its the "we've always done it this way" attitude.	Other	Federal GOVERNMENT employee		Mid career (10 - 20 yrs)	50-99	White		Female	United States of America
100	1218	TRUE	2021-03-11 13:10:47		Less than 10			11 to 50		Life Science	Aquatic Ecology		Slightly familiar	Slightly familiar	Poorly	Yes	Slightly familiar	Professional conferences,Personal communication, i.e. just talking to someone about a field,If "other", please tell us what you use:	Peer-reviewed papers, books with species life history data, internal communication with species experts	Reading peer-reviewed papers from that discipline,Contacting a colleague in that discipline,Attend a conference,Textbooks, or other education materials		Neither easy nor difficult	No		Textbooks, or other educational materials		Neither easy nor difficult	None	None	None	A few times (x2)	A few times (x2)	I have never needed to do this	Developing [We understand the basics, but much additional science or technique development is required to address some fundamental sources of uncertainty]	Developing [We understand the basics, but much additional science or technique development is required to address some fundamental sources of uncertainty]	Developing [We understand the basics, but fundamental sources of uncertainty remain]	I do not know	I do not know	I do not know		Problems in the structure of the management agency (i.e. laws and regulations restrict the management organization or agency in using new science)	State GOVERNMENT employee		Early career (1 - 10 yrs)	1000 or more	White		Female	United States of America
100	1401	TRUE	2021-03-11 13:14:42	Less than 10	Less than 10	None	11 to 50	11 to 50	Less than 10	Life Science	Wildlife Biology		Moderately familiar	Moderately familiar	Poorly	Yes	Moderately familiar	Peer-reviewed paper recommendations from others in my field (including via Twitter feeds),Professional conferences,Ad-hoc through paper reviews or literature reviews for a paper I'm writing,Personal communication, i.e. just talking to someone about a field		Reading peer-reviewed papers from that discipline,Reading synthesis papers from peer-reviewed literature,Contacting a colleague in that discipline,Textbooks, or other education materials,A research network, i.e. the Earth Science Research Network		Neither easy nor difficult	Yes	Slightly familiar	Reading synthesis papers from peer-reviewed literature		Somewhat easy	None	1 - 3 papers per year	None	A few times (x2)	A few times (x2)	I have never needed to do this	Developing [We understand the basics, but much additional science or technique development is required to address some fundamental sources of uncertainty]	Developing [We understand the basics, but much additional science or technique development is required to address some fundamental sources of uncertainty]	Mature [We understand the underlying mechanisms, but there is room for improvement]	Within a few years	Sometimes	A lack of staff/personnel		A lack of staff/personnel	Federal GOVERNMENT employee		Mid career (10 - 20 yrs)	20-49	White		Female	United States of America
100	573	TRUE	2021-03-11 13:17:59	Less than 10	Less than 10	None	Less than 10	11 to 50	Less than 10	Life Science	Aquatic Ecology		Slightly familiar	Slightly familiar	Poorly	No		Regularly reading a particular peer-reviewed journal (or set of journals),Peer-reviewed paper recommendations from others in my field (including via Twitter feeds),Professional conferences,Non peer-reviewed material, i.e. news articles, websites and blogs		Reading peer-reviewed papers from that discipline,Reading synthesis papers from peer-reviewed literature,Wikipedia,Contacting a colleague in that discipline,Textbooks, or other education materials		Somewhat easy	Yes	Slightly familiar	Wikipedia		Neither easy nor difficult	1 - 3 papers per year	1 - 3 papers per year	1 - 3 papers per year	A few times (x2)	A few times (x2)	I have never needed to do this	Mature [We understand the underlying mechanisms, and have adequate techniques for monitoring, but there are a few areas where improvements are needed]	Mature [We understand the underlying mechanisms, and have adequate techniques for monitoring, but there are a few areas where improvements are needed]	Mature [We understand the underlying mechanisms, but there is room for improvement]	Within a few years	Frequently	A lack of access to information		A lack of access to information	SELF-EMPLOYED		Early career (1 - 10 yrs)	2021-01-04	White		Female	United States of America
100	469	TRUE	2021-03-11 13:18:57	11 to 50	Less than 10	Less than 10	11 to 50	Less than 10	Less than 10	Earth Science	Natural Resource Management		Moderately familiar	Moderately familiar	Moderately well	Yes	Moderately familiar	Regularly reading a particular peer-reviewed journal (or set of journals),Ad-hoc through paper reviews or literature reviews for a paper I'm writing,Personal communication, i.e. just talking to someone about a field		Reading peer-reviewed papers from that discipline,Reading synthesis papers from peer-reviewed literature,Contacting a colleague in that discipline,Textbooks, or other education materials		Neither easy nor difficult	Yes	Slightly familiar	Contacting a colleague in that discipline		Neither easy nor difficult	None	None	None	Several times (x3)	Several times (x3)	I have never needed to do this	Mature [We understand the underlying mechanisms, and have adequate techniques for monitoring, but there are a few areas where improvements are needed]	Mature [We understand the underlying mechanisms, and have adequate techniques for monitoring, but there are a few areas where improvements are needed]	Mature [We understand the underlying mechanisms, but there is room for improvement]	Within a few months	Frequently	A lack of staff/personnel,Other	Senior management can impede incorporation of methods of natural resources management.	Other	Federal GOVERNMENT employee		Early career (1 - 10 yrs)	20-49	White		Non-binary / third gender	United States of America
100	491	TRUE	2021-03-11 13:19:18	11 to 50			11 to 50			Earth Science	Environmental Politics and Policy		Moderately familiar	Moderately familiar	Moderately well	Yes	Slightly familiar	Peer-reviewed paper recommendations from others in my field (including via Twitter feeds),Personal communication, i.e. just talking to someone about a field		Reading peer-reviewed papers from that discipline,Reading synthesis papers from peer-reviewed literature,Contacting a colleague in that discipline,Attend a conference,A research network, i.e. the Earth Science Research Network		Somewhat easy	Yes	Moderately familiar	Google scholar		Easy	None	None	None	A few times (x2)	A few times (x2)	Somewhat Challenging	Mature [We understand the underlying mechanisms, and have adequate techniques for monitoring, but there are a few areas where improvements are needed]	Developing [We understand the basics, but much additional science or technique development is required to address some fundamental sources of uncertainty]	Developing [We understand the basics, but fundamental sources of uncertainty remain]	Within a few years	Sometimes	Other	Sometimes the new science is hard to combined with management	A lack of synthesis	State GOVERNMENT employee		Early career (1 - 10 yrs)	2021-01-04	White		Female	United States of America
100	592	TRUE	2021-03-11 13:19:46	None	None	11 to 50	Less than 10	Less than 10	51 and above	Social Science	Environmental Economics		Very familiar	Extremely familiar	Moderately well	Yes	Extremely familiar	Regularly reading a particular peer-reviewed journal (or set of journals),Peer-reviewed paper recommendations from others in my field (including via Twitter feeds),Ad-hoc through paper reviews or literature reviews for a paper I'm writing,Non peer-reviewed material, i.e. news articles, websites and blogs		Reading peer-reviewed papers from that discipline,Reading synthesis papers from peer-reviewed literature,Contacting a colleague in that discipline,Google non-peer reviewed material, i.e. news articles, blogs etc.,Textbooks, or other education materials,A research network, i.e. the Earth Science Research Network		Somewhat easy	Yes	Slightly familiar	Reading synthesis papers from peer-reviewed literature		Neither easy nor difficult	1 - 3 papers per year	1 - 3 papers per year	1 - 3 papers per year	Several times (x3)	A few times (x2)	Somewhat Challenging	Mature [We understand the underlying mechanisms, and have adequate techniques for monitoring, but there are a few areas where improvements are needed]	Starting [We are just beginning to understand what is going on]	Developing [We understand the basics, but fundamental sources of uncertainty remain]	>5 years	I do not know	A lack of access to information,A lack of synthesis,A lack of consensus within the science community,A lack of staff/personnel		A lack of synthesis	PRIVATE-FOR-PROFIT company, business or individual, for wages, salary or commissions		Early career (1 - 10 yrs)	2021-01-04	White		Male	United States of America
100	664	TRUE	2021-03-11 13:25:00	Less than 10	Less than 10	Less than 10	11 to 50	None	None	Earth Science	Meteorology/Climatology		Slightly familiar	Moderately familiar	Poorly	Yes	Moderately familiar	Peer-reviewed paper recommendations from others in my field (including via Twitter feeds),Professional conferences,Ad-hoc through paper reviews or literature reviews for a paper I'm writing,Personal communication, i.e. just talking to someone about a field		Reading peer-reviewed papers from that discipline,Contacting a colleague in that discipline,Attend a conference,A research network, i.e. the Earth Science Research Network		Somewhat easy	Yes	Moderately familiar	Contacting a colleague in that discipline		Somewhat easy	1 - 3 papers per year	1 - 3 papers per year	4 - 12 papers per year	Several times (x3)	A few times (x2)	Somewhat Challenging	Developing [We understand the basics, but much additional science or technique development is required to address some fundamental sources of uncertainty]	Starting [We are just beginning to understand what is going on]	Developing [We understand the basics, but fundamental sources of uncertainty remain]	>5 years	Sometimes	A lack of access to information,Problems in the structure of the management agency (i.e. laws and regulations restrict the management organization or agency in using new science)		Problems in the structure of the management agency (i.e. laws and regulations restrict the management organization or agency in using new science)	ACADEMIC		Early career (1 - 10 yrs)	500-999	Prefer not to say		Prefer not to say	United States of America
100	754	TRUE	2021-03-11 13:25:28	Less than 10	Less than 10	11 to 50	11 to 50	11 to 50	11 to 50	Social Science	Environmental Economics		Slightly familiar	Moderately familiar	Poorly	Yes	Very familiar	Peer-reviewed paper recommendations from others in my field (including via Twitter feeds),Professional conferences,Non peer-reviewed material, i.e. news articles, websites and blogs		Reading peer-reviewed papers from that discipline,Reading synthesis papers from peer-reviewed literature,Wikipedia,Attend a conference,Textbooks, or other education materials,A research network, i.e. the Earth Science Research Network		Neither easy nor difficult	No		Wikipedia		Neither easy nor difficult	None	1 - 3 papers per year	4 - 12 papers per year	A few times (x2)	A few times (x2)	Somewhat Challenging	Developing [We understand the basics, but much additional science or technique development is required to address some fundamental sources of uncertainty]	Starting [We are just beginning to understand what is going on]	Mature [We understand the underlying mechanisms, but there is room for improvement]	>5 years	Sometimes	A lack of synthesis,A lack of consensus within the science community,A lack of staff/personnel		A lack of staff/personnel	Federal GOVERNMENT employee		Senior (20 yrs +)	1000 or more	White		Male	United States of America
100	488	TRUE	2021-03-11 13:32:15	None	None	None	None	Less than 10	Less than 10	Social Science	Natural Resource Management		Slightly familiar	Moderately familiar	Poorly	Yes	Moderately familiar	Personal communication, i.e. just talking to someone about a field,Non peer-reviewed material, i.e. news articles, websites and blogs		Reading peer-reviewed papers from that discipline,Reading synthesis papers from peer-reviewed literature,Contacting a colleague in that discipline,Google non-peer reviewed material, i.e. news articles, blogs etc.		Neither easy nor difficult	Yes	Slightly familiar	Contacting a colleague in that discipline		Somewhat difficult	None	None	None	A few times (x2)	A few times (x2)	Somewhat Easy	Mature [We understand the underlying mechanisms, and have adequate techniques for monitoring, but there are a few areas where improvements are needed]	Developing [We understand the basics, but much additional science or technique development is required to address some fundamental sources of uncertainty]	I do not know	>10 years	Sometimes	Problems in the structure of the management agency (i.e. laws and regulations restrict the management organization or agency in using new science)		Problems in the structure of the management agency (i.e. laws and regulations restrict the management organization or agency in using new science)	Federal GOVERNMENT employee		Mid career (10 - 20 yrs)	100-249	White		Male	United States of America
100	683	TRUE	2021-03-11 13:34:21	Less than 10	Less than 10	11 to 50	Less than 10	Less than 10	11 to 50	Social Science	Environmental Economics		Very familiar	Very familiar	Moderately well	Yes	Moderately familiar	Ad-hoc through paper reviews or literature reviews for a paper I'm writing,Non peer-reviewed material, i.e. news articles, websites and blogs		Reading peer-reviewed papers from that discipline,Google non-peer reviewed material, i.e. news articles, blogs etc.		Somewhat difficult	No		Google scholar		Somewhat difficult	None	None	None	Many times (>4)	Many times (>4)	Challenging	Mature [We understand the underlying mechanisms, and have adequate techniques for monitoring, but there are a few areas where improvements are needed]	Mature [We understand the underlying mechanisms, and have adequate techniques for monitoring, but there are a few areas where improvements are needed]	Mature [We understand the underlying mechanisms, but there is room for improvement]	I do not know	I do not know	A lack of synthesis,A lack of consensus within the science community,A lack of staff/personnel,I do not know		I do not know	ACADEMIC		Early career (1 - 10 yrs)	20-49	Prefer not to say		Male	United States of America
100	705	TRUE	2021-03-11 13:36:12	Less than 10			Less than 10			Earth Science	Other		Slightly familiar	Slightly familiar	Moderately well	Yes	Very familiar	Personal communication, i.e. just talking to someone about a field		Contacting a colleague in that discipline		Neither easy nor difficult	Yes	Moderately familiar	Reading peer-reviewed papers from that discipline		Somewhat easy	None	None	None	A few times (x2)	A few times (x2)	I have never needed to do this	Advanced [We can quantify the uncertainty and know the driving mechanisms]	Advanced [We can quantify the uncertainty and know the driving mechanisms]	Mature [We understand the underlying mechanisms, but there is room for improvement]	>5 years	Sometimes	Problems in the structure of the management agency (i.e. laws and regulations restrict the management organization or agency in using new science)		Problems in the structure of the management agency (i.e. laws and regulations restrict the management organization or agency in using new science)	Local GOVERNMENT employee (city, county, etc.)		Mid career (10 - 20 yrs)	2021-01-04	White		Male	United States of America
100	388	TRUE	2021-03-11 13:36:59	Less than 10	None	11 to 50	11 to 50	Less than 10	51 and above	Social Science	Environmental Economics		Very familiar	Extremely familiar	Very well	Yes	Extremely familiar	Regularly reading a particular peer-reviewed journal (or set of journals),Peer-reviewed paper recommendations from others in my field (including via Twitter feeds),Professional conferences,Ad-hoc through paper reviews or literature reviews for a paper I'm writing,Personal communication, i.e. just talking to someone about a field		Reading peer-reviewed papers from that discipline,Reading synthesis papers from peer-reviewed literature,A research network, i.e. the Earth Science Research Network		Somewhat easy	Yes	Moderately familiar	Contacting a colleague in that discipline		Neither easy nor difficult	1 - 3 papers per year	4 - 12 papers per year	4 - 12 papers per year	Many times (>4)	A few times (x2)	Not Easy; Not Challenging	Developing [We understand the basics, but much additional science or technique development is required to address some fundamental sources of uncertainty]	Developing [We understand the basics, but much additional science or technique development is required to address some fundamental sources of uncertainty]	Developing [We understand the basics, but fundamental sources of uncertainty remain]	>10 years	Sometimes	A lack of staff/personnel,Problems in the structure of the management agency (i.e. laws and regulations restrict the management organization or agency in using new science)		A lack of staff/personnel	ACADEMIC		Early career (1 - 10 yrs)	1000 or more	White		Male	United States of America
100	1317	TRUE	2021-03-11 13:38:45	Less than 10	Less than 10		11 to 50	11 to 50		Life Science	Geology & Geophysics		Moderately familiar	Very familiar	Moderately well	Yes	Moderately familiar	Peer-reviewed paper recommendations from others in my field (including via Twitter feeds),Personal communication, i.e. just talking to someone about a field,Non peer-reviewed material, i.e. news articles, websites and blogs		Reading peer-reviewed papers from that discipline		Easy	Yes	Moderately familiar	A research network, i.e. the Earth Science Research Network		Somewhat easy	None	None	None	A few times (x2)	A few times (x2)	I have never needed to do this	Developing [We understand the basics, but much additional science or technique development is required to address some fundamental sources of uncertainty]	Starting [We are just beginning to understand what is going on]	Starting [We are just beginning to understand what is going on]	>10 years	Sometimes	A lack of consensus within the science community,A lack of staff/personnel,Problems in the structure of the management agency (i.e. laws and regulations restrict the management organization or agency in using new science),Other	alack of resources in general	Problems in the structure of the management agency (i.e. laws and regulations restrict the management organization or agency in using new science)	State GOVERNMENT employee		Mid career (10 - 20 yrs)	2021-01-04	White		Male	United States of America
100	595	TRUE	2021-03-11 13:49:30		51 and above			51 and above		Life Science	Other	Forest Health	Extremely familiar	Extremely familiar	Very well	Yes	Extremely familiar	Regularly reading a particular peer-reviewed journal (or set of journals),Peer-reviewed paper recommendations from others in my field (including via Twitter feeds),Professional conferences,Ad-hoc through paper reviews or literature reviews for a paper I'm writing,Personal communication, i.e. just talking to someone about a field,Non peer-reviewed material, i.e. news articles, websites and blogs		Reading peer-reviewed papers from that discipline,Reading synthesis papers from peer-reviewed literature		Somewhat easy	Yes	Very familiar	Reading peer-reviewed papers from that discipline		Somewhat easy	1 - 3 papers per year	4 - 12 papers per year	4 - 12 papers per year	A few times (x2)	A few times (x2)	Somewhat Challenging	Mature [We understand the underlying mechanisms, and have adequate techniques for monitoring, but there are a few areas where improvements are needed]	Developing [We understand the basics, but much additional science or technique development is required to address some fundamental sources of uncertainty]	Starting [We are just beginning to understand what is going on]	>5 years	Sometimes	Too many sources of information,A lack of consensus within the science community,A lack of staff/personnel		Too many sources of information	ACADEMIC		Senior (20 yrs +)	20-49	White		Male	United States of America
100	1033	TRUE	2021-03-11 13:53:01	Less than 10	None	Less than 10	11 to 50	None	Less than 10	Earth Science	Natural Resource Management		Slightly familiar	Moderately familiar	Poorly	Yes	Slightly familiar	Ad-hoc through paper reviews or literature reviews for a paper I'm writing,Personal communication, i.e. just talking to someone about a field,Non peer-reviewed material, i.e. news articles, websites and blogs		Reading peer-reviewed papers from that discipline		Somewhat easy	No		Google scholar		Neither easy nor difficult	None	1 - 3 papers per year	None	A few times (x2)	A few times (x2)	I have never needed to do this	Mature [We understand the underlying mechanisms, and have adequate techniques for monitoring, but there are a few areas where improvements are needed]	I do not know	I do not know	Within a few years	Frequently	Problems in the structure of the management agency (i.e. laws and regulations restrict the management organization or agency in using new science)		Problems in the structure of the management agency (i.e. laws and regulations restrict the management organization or agency in using new science)	State GOVERNMENT employee		Mid career (10 - 20 yrs)	250-499	White		Male	United States of America
100	1707	TRUE	2021-03-11 13:53:24	11 to 50	11 to 50	51 and above	11 to 50	11 to 50	51 and above	Social Science	Environmental Economics		Extremely familiar	Extremely familiar	Very well	Yes	Extremely familiar	Regularly reading a particular peer-reviewed journal (or set of journals)		Reading peer-reviewed papers from that discipline		Somewhat easy	Yes	Extremely familiar	Reading peer-reviewed papers from that discipline		Somewhat easy	1 - 3 papers per year	1 - 3 papers per year	1 - 3 papers per year	Many times (>4)	Many times (>4)	Somewhat Easy	Mature [We understand the underlying mechanisms, and have adequate techniques for monitoring, but there are a few areas where improvements are needed]	Mature [We understand the underlying mechanisms, and have adequate techniques for monitoring, but there are a few areas where improvements are needed]	Advanced [We understand the driving mechanisms and can quantify cost and risk reasonably accurately]	Within a few months	Frequently	Too many sources of information,A lack of access to information,A lack of synthesis,A lack of consensus within the science community,Problems in the structure of the management agency (i.e. laws and regulations restrict the management organization or agency in using new science)		Problems in the structure of the management agency (i.e. laws and regulations restrict the management organization or agency in using new science)	ACADEMIC		Mid career (10 - 20 yrs)	100-249	Black or African American		Female	United States of America
100	655	TRUE	2021-03-11 13:56:34	Less than 10	None	None	Less than 10	None	None	Earth Science	Water Resource Management		Slightly familiar	Slightly familiar	Poorly	Yes	Moderately familiar	Peer-reviewed paper recommendations from others in my field (including via Twitter feeds),Professional conferences,Non peer-reviewed material, i.e. news articles, websites and blogs		Reading synthesis papers from peer-reviewed literature,Contacting a colleague in that discipline,Google non-peer reviewed material, i.e. news articles, blogs etc.,Attend a conference		Neither easy nor difficult	Yes	Moderately familiar	Reading peer-reviewed papers from that discipline		Neither easy nor difficult	None	None	1 - 3 papers per year	Several times (x3)	Several times (x3)	Somewhat Challenging	Developing [We understand the basics, but much additional science or technique development is required to address some fundamental sources of uncertainty]	Developing [We understand the basics, but much additional science or technique development is required to address some fundamental sources of uncertainty]	Developing [We understand the basics, but fundamental sources of uncertainty remain]	I do not know	Frequently	A lack of synthesis,A lack of consensus within the science community,A lack of staff/personnel		Problems in the structure of the management agency (i.e. laws and regulations restrict the management organization or agency in using new science)	PRIVATE-NOT-FOR-PROFIT, tax-exempt, charitable organization		Mid career (10 - 20 yrs)	2021-01-04	White		Female	United States of America
100	620	TRUE	2021-03-11 13:59:47	None	Less than 10	None	None	Less than 10	None	Life Science	Natural Resource Management		Slightly familiar	Slightly familiar	Moderately well	Yes	Slightly familiar	Peer-reviewed paper recommendations from others in my field (including via Twitter feeds),If "other", please tell us what you use:	online review of literature for specific questions relating to nat resources	Contacting a colleague in that discipline		Neither easy nor difficult	Yes	Slightly familiar	Textbooks, or other educational materials		Somewhat difficult	None	None	None	A few times (x2)	A few times (x2)	I have never needed to do this	Mature [We understand the underlying mechanisms, and have adequate techniques for monitoring, but there are a few areas where improvements are needed]	Developing [We understand the basics, but much additional science or technique development is required to address some fundamental sources of uncertainty]	Developing [We understand the basics, but fundamental sources of uncertainty remain]	Within a few years	Frequently	A lack of access to information,A lack of consensus within the science community,Problems in the structure of the management agency (i.e. laws and regulations restrict the management organization or agency in using new science)		A lack of consensus within the science community	Federal GOVERNMENT employee		Senior (20 yrs +)	20-49	White		Male	United States of America
100	1847	TRUE	2021-03-11 14:01:26	None	None	None	Less than 10	None	None	Earth Science	Hydrology		Not familiar at all	Slightly familiar	Moderately well	Yes	Moderately familiar	Regularly reading a particular peer-reviewed journal (or set of journals),Professional conferences,Personal communication, i.e. just talking to someone about a field,Non peer-reviewed material, i.e. news articles, websites and blogs		Reading peer-reviewed papers from that discipline,Contacting a colleague in that discipline,Attend a conference,Textbooks, or other education materials		Neither easy nor difficult	Yes	Slightly familiar	Reading peer-reviewed papers from that discipline		Neither easy nor difficult	None	None	None	A few times (x2)	Several times (x3)	Not Easy; Not Challenging	I do not know	Mature [We understand the underlying mechanisms, and have adequate techniques for monitoring, but there are a few areas where improvements are needed]	Developing [We understand the basics, but fundamental sources of uncertainty remain]	Within a few years	Frequently	A lack of staff/personnel,Other	Money	A lack of staff/personnel	PRIVATE-NOT-FOR-PROFIT, tax-exempt, charitable organization		Early career (1 - 10 yrs)	2021-05-09	White		Male	United States of America
100	270	TRUE	2021-03-11 14:10:45
100	82001	TRUE	2021-03-11 14:12:40	Less than 10	51 and above	Less than 10	11 to 50	51 and above	Less than 10	Life Science	Natural Resource Management		Moderately familiar	Moderately familiar	Poorly	Yes	Moderately familiar	Peer-reviewed paper recommendations from others in my field (including via Twitter feeds),Personal communication, i.e. just talking to someone about a field,Non peer-reviewed material, i.e. news articles, websites and blogs		Reading peer-reviewed papers from that discipline,Reading synthesis papers from peer-reviewed literature,Contacting a colleague in that discipline		Somewhat easy	No		Google scholar		Somewhat easy	None	None	1 - 3 papers per year	A few times (x2)	A few times (x2)	Somewhat Challenging	Developing [We understand the basics, but much additional science or technique development is required to address some fundamental sources of uncertainty]	Developing [We understand the basics, but much additional science or technique development is required to address some fundamental sources of uncertainty]	Starting [We are just beginning to understand what is going on]	>5 years	Sometimes	Problems in the structure of the management agency (i.e. laws and regulations restrict the management organization or agency in using new science)		Problems in the structure of the management agency (i.e. laws and regulations restrict the management organization or agency in using new science)	State GOVERNMENT employee		Mid career (10 - 20 yrs)	2021-05-09	White		Male	United States of America
100	396	TRUE	2021-03-11 14:16:08	None	Less than 10	Less than 10	None	Less than 10	Less than 10	Social Science	Organizational Behavior		Slightly familiar	Slightly familiar	Poorly	Yes	Not familiar at all	Professional conferences,Personal communication, i.e. just talking to someone about a field,Non peer-reviewed material, i.e. news articles, websites and blogs		Wikipedia,Contacting a colleague in that discipline,Google non-peer reviewed material, i.e. news articles, blogs etc.,Attend a conference		Somewhat difficult	No		Wikipedia		Somewhat difficult	None	None	1 - 3 papers per year	A few times (x2)	Several times (x3)	I have never needed to do this	Advanced [We can quantify the uncertainty and know the driving mechanisms]	Mature [We understand the underlying mechanisms, and have adequate techniques for monitoring, but there are a few areas where improvements are needed]	Developing [We understand the basics, but fundamental sources of uncertainty remain]	I do not know	Frequently	A lack of consensus within the science community		A lack of consensus within the science community	Local GOVERNMENT employee (city, county, etc.)		Mid career (10 - 20 yrs)	100-249	White		Female	United States of America
100	385	TRUE	2021-03-11 14:16:51	Less than 10	Less than 10	Less than 10	Less than 10	Less than 10	11 to 50	Social Science	Environmental Economics		Slightly familiar	Moderately familiar	Poorly	Yes	Moderately familiar	Ad-hoc through paper reviews or literature reviews for a paper I'm writing		Reading peer-reviewed papers from that discipline		Somewhat easy	No		Reading peer-reviewed papers from that discipline		Somewhat easy	1 - 3 papers per year	1 - 3 papers per year	1 - 3 papers per year	A few times (x2)	A few times (x2)	I have never needed to do this	I do not know	Mature [We understand the underlying mechanisms, and have adequate techniques for monitoring, but there are a few areas where improvements are needed]	Developing [We understand the basics, but fundamental sources of uncertainty remain]	>10 years	Sometimes	A lack of synthesis,A lack of staff/personnel		A lack of staff/personnel	Federal GOVERNMENT employee		Mid career (10 - 20 yrs)	20-49	White		Male	United States of America
100	974	TRUE	2021-03-11 14:25:20	Less than 10	Less than 10	None	11 to 50	11 to 50	None	Life Science	Aquatic Ecology		Slightly familiar	Moderately familiar	Poorly	Yes	Moderately familiar	Peer-reviewed paper recommendations from others in my field (including via Twitter feeds),Professional conferences,Ad-hoc through paper reviews or literature reviews for a paper I'm writing		Reading peer-reviewed papers from that discipline,Reading synthesis papers from peer-reviewed literature,Contacting a colleague in that discipline,Attend a conference		Neither easy nor difficult	No		Contacting a colleague in that discipline		Somewhat difficult	None	None	None	A few times (x2)	A few times (x2)	I have never needed to do this	I do not know	Advanced [We can quantify the uncertainty and know the driving mechanisms]	I do not know	I do not know	Sometimes	A lack of synthesis,A lack of consensus within the science community,A lack of staff/personnel		A lack of staff/personnel	PRIVATE-NOT-FOR-PROFIT, tax-exempt, charitable organization		Senior (20 yrs +)	2021-01-04	White		Female	United States of America
100	688	TRUE	2021-03-11 14:33:56	51 and above	Less than 10	None	51 and above	11 to 50	11 to 50	Earth Science	Wildlife Biology		Slightly familiar	Moderately familiar	Poorly	Yes	Moderately familiar	Regularly reading a particular peer-reviewed journal (or set of journals),Peer-reviewed paper recommendations from others in my field (including via Twitter feeds),Ad-hoc through paper reviews or literature reviews for a paper I'm writing,Personal communication, i.e. just talking to someone about a field,Non peer-reviewed material, i.e. news articles, websites and blogs		Reading peer-reviewed papers from that discipline,Contacting a colleague in that discipline,Textbooks, or other education materials		Somewhat easy	Yes	Slightly familiar	Contacting a colleague in that discipline		Somewhat difficult	1 - 3 papers per year	1 - 3 papers per year	None	A few times (x2)	A few times (x2)	Somewhat Easy	Advanced [We can quantify the uncertainty and know the driving mechanisms]	Mature [We understand the underlying mechanisms, and have adequate techniques for monitoring, but there are a few areas where improvements are needed]	Developing [We understand the basics, but fundamental sources of uncertainty remain]	>5 years	Sometimes	Other	Time required to go through NEPA process	Problems in the structure of the management agency (i.e. laws and regulations restrict the management organization or agency in using new science)	Federal GOVERNMENT employee		Early career (1 - 10 yrs)	20-49	Prefer not to say		Prefer not to say	United States of America
100	700	TRUE	2021-03-11 14:37:50	11 to 50	Less than 10	Less than 10	51 and above	11 to 50	11 to 50	Earth Science	Natural Resource Management		Slightly familiar	Moderately familiar	Moderately well	Yes	Moderately familiar	Peer-reviewed paper recommendations from others in my field (including via Twitter feeds),Professional conferences,Personal communication, i.e. just talking to someone about a field,Non peer-reviewed material, i.e. news articles, websites and blogs,If "other", please tell us what you use:	peer reviewed technical manuals	Reading peer-reviewed papers from that discipline,Reading synthesis papers from peer-reviewed literature,Contacting a colleague in that discipline,Textbooks, or other education materials		Somewhat easy	Yes	Moderately familiar	Reading peer-reviewed papers from that discipline		Neither easy nor difficult	None	1 - 3 papers per year	1 - 3 papers per year	Several times (x3)	A few times (x2)	I have never needed to do this	Advanced [We can quantify the uncertainty and know the driving mechanisms]	Mature [We understand the underlying mechanisms, and have adequate techniques for monitoring, but there are a few areas where improvements are needed]	Mature [We understand the underlying mechanisms, but there is room for improvement]	Within a few years	Sometimes	Problems in the structure of the management agency (i.e. laws and regulations restrict the management organization or agency in using new science),Other	Problems in the culture of agencies prevent changes in management because the old ways are more suited to their personal objectives	Other	Local GOVERNMENT employee (city, county, etc.)		Early career (1 - 10 yrs)	2021-01-04	White		Female	United States of America
100	544	TRUE	2021-03-11 14:42:46	None	None	None	None	11 to 50	11 to 50	Life Science	Wildlife Biology		Slightly familiar	Moderately familiar	Poorly	Yes	Moderately familiar	Peer-reviewed paper recommendations from others in my field (including via Twitter feeds),Professional conferences,Personal communication, i.e. just talking to someone about a field,Non peer-reviewed material, i.e. news articles, websites and blogs		Reading peer-reviewed papers from that discipline,Reading synthesis papers from peer-reviewed literature,Contacting a colleague in that discipline,Textbooks, or other education materials		Somewhat easy	Yes	Slightly familiar	Attend a conference		Neither easy nor difficult	None	1 - 3 papers per year	None	Several times (x3)	A few times (x2)	Somewhat Challenging	Mature [We understand the underlying mechanisms, and have adequate techniques for monitoring, but there are a few areas where improvements are needed]	Mature [We understand the underlying mechanisms, and have adequate techniques for monitoring, but there are a few areas where improvements are needed]	Developing [We understand the basics, but fundamental sources of uncertainty remain]	I do not know	Frequently	A lack of staff/personnel,Problems in the structure of the management agency (i.e. laws and regulations restrict the management organization or agency in using new science)		Problems in the structure of the management agency (i.e. laws and regulations restrict the management organization or agency in using new science)	State GOVERNMENT employee		Mid career (10 - 20 yrs)	1000 or more	White		Female	United States of America
100	416	TRUE	2021-03-11 14:52:52	Less than 10	None	None	11 to 50	11 to 50	Less than 10	Earth Science	Agricultural science		Moderately familiar	Very familiar	Moderately well	Yes	Extremely familiar	Peer-reviewed paper recommendations from others in my field (including via Twitter feeds),Professional conferences,Personal communication, i.e. just talking to someone about a field,Non peer-reviewed material, i.e. news articles, websites and blogs		Reading peer-reviewed papers from that discipline,Reading synthesis papers from peer-reviewed literature,Attend a conference		Neither easy nor difficult	No		Contacting a colleague in that discipline		Neither easy nor difficult	None	None	None	Once	Once	Somewhat Challenging	Developing [We understand the basics, but much additional science or technique development is required to address some fundamental sources of uncertainty]	Starting [We are just beginning to understand what is going on]	Developing [We understand the basics, but fundamental sources of uncertainty remain]	>5 years	I do not know	A lack of staff/personnel,Problems in the structure of the management agency (i.e. laws and regulations restrict the management organization or agency in using new science)		Problems in the structure of the management agency (i.e. laws and regulations restrict the management organization or agency in using new science)	Local GOVERNMENT employee (city, county, etc.)		Early career (1 - 10 yrs)	2021-01-04	Prefer not to say		Prefer not to say	United States of America
100	259	TRUE	2021-03-11 15:07:57	Less than 10	None	Less than 10	11 to 50	None	51 and above	Social Science	Environmental Economics		Very familiar	Extremely familiar	Very well	Yes	Extremely familiar	Peer-reviewed paper recommendations from others in my field (including via Twitter feeds),Professional conferences,Ad-hoc through paper reviews or literature reviews for a paper I'm writing,Personal communication, i.e. just talking to someone about a field		Reading peer-reviewed papers from that discipline,Reading synthesis papers from peer-reviewed literature,Contacting a colleague in that discipline		Easy	Yes	Moderately familiar	Google scholar		Somewhat easy	1 - 3 papers per year	1 - 3 papers per year	4 - 12 papers per year	Several times (x3)	Once	Not Easy; Not Challenging	Mature [We understand the underlying mechanisms, and have adequate techniques for monitoring, but there are a few areas where improvements are needed]	Mature [We understand the underlying mechanisms, and have adequate techniques for monitoring, but there are a few areas where improvements are needed]	Mature [We understand the underlying mechanisms, but there is room for improvement]	I do not know	I do not know	I do not know		I do not know	ACADEMIC		Early career (1 - 10 yrs)	1000 or more	Chinese		Male	United States of America
100	543	TRUE	2021-03-11 15:07:57	11 to 50	11 to 50	11 to 50	51 and above	11 to 50	11 to 50	Earth Science	Water Resource Management		Moderately familiar	Moderately familiar	Moderately well	Yes	Moderately familiar	Peer-reviewed paper recommendations from others in my field (including via Twitter feeds),Ad-hoc through paper reviews or literature reviews for a paper I'm writing,Non peer-reviewed material, i.e. news articles, websites and blogs		Reading peer-reviewed papers from that discipline,Reading synthesis papers from peer-reviewed literature,Wikipedia,Contacting a colleague in that discipline,Google non-peer reviewed material, i.e. news articles, blogs etc.,Attend a conference,Textbooks, or other education materials		Neither easy nor difficult	Yes	Slightly familiar	Reading peer-reviewed papers from that discipline		Neither easy nor difficult	1 - 3 papers per year	4 - 12 papers per year	1 - 3 papers per year	Several times (x3)	Several times (x3)	Somewhat Challenging	Mature [We understand the underlying mechanisms, and have adequate techniques for monitoring, but there are a few areas where improvements are needed]	Developing [We understand the basics, but much additional science or technique development is required to address some fundamental sources of uncertainty]	Developing [We understand the basics, but fundamental sources of uncertainty remain]	Within a few years	Sometimes	A lack of staff/personnel,Problems in the structure of the management agency (i.e. laws and regulations restrict the management organization or agency in using new science)		I do not know	PRIVATE-NOT-FOR-PROFIT, tax-exempt, charitable organization		Senior (20 yrs +)	1000 or more	Japanese		Female	United States of America
100	392	TRUE	2021-03-11 15:10:44	None	None	None	None	None	None		Hydrology		Slightly familiar	I do not have access to the literature	Poorly	Yes	Not familiar at all	Personal communication, i.e. just talking to someone about a field		Contacting a colleague in that discipline		Somewhat difficult	Yes		Contacting a colleague in that discipline		Neither easy nor difficult	None	None	None	I do not read the peer-reviewed literature	I do not read the peer-reviewed literature	I have never needed to do this	I do not know	I do not know	I do not know	I do not know	I do not know	Problems in the structure of the management agency (i.e. laws and regulations restrict the management organization or agency in using new science)		Problems in the structure of the management agency (i.e. laws and regulations restrict the management organization or agency in using new science)	Local GOVERNMENT employee (city, county, etc.)		Senior (20 yrs +)	2021-01-04	White		Male	United States of America
100	594	TRUE	2021-03-11 15:16:37	Less than 10	11 to 50	Less than 10	11 to 50	11 to 50	Less than 10	Earth Science	Natural Resource Management		Moderately familiar	Slightly familiar	Moderately well	Yes	Moderately familiar	Peer-reviewed paper recommendations from others in my field (including via Twitter feeds),Ad-hoc through paper reviews or literature reviews for a paper I'm writing,Personal communication, i.e. just talking to someone about a field,Non peer-reviewed material, i.e. news articles, websites and blogs		Reading peer-reviewed papers from that discipline,Reading synthesis papers from peer-reviewed literature,Contacting a colleague in that discipline,Textbooks, or other education materials		Neither easy nor difficult	Yes	Moderately familiar	Reading peer-reviewed papers from that discipline		Neither easy nor difficult	None	1 - 3 papers per year	None	Many times (>4)	Several times (x3)	Challenging	Mature [We understand the underlying mechanisms, and have adequate techniques for monitoring, but there are a few areas where improvements are needed]	Mature [We understand the underlying mechanisms, and have adequate techniques for monitoring, but there are a few areas where improvements are needed]	Mature [We understand the underlying mechanisms, but there is room for improvement]	Within a few years	Rarely	Too many sources of information,A lack of access to information,A lack of synthesis,A lack of staff/personnel,Problems in the structure of the management agency (i.e. laws and regulations restrict the management organization or agency in using new science)		A lack of staff/personnel	ACADEMIC		Mid career (10 - 20 yrs)	20-49	White		Male	United States of America
100	5486	TRUE	2021-03-11 15:17:43
100	551	TRUE	2021-03-11 15:24:57	51 and above	51 and above	Less than 10	51 and above	51 and above	Less than 10	Earth Science	Agricultural science		Very familiar	Extremely familiar	Very well	Yes	Extremely familiar	Regularly reading a particular peer-reviewed journal (or set of journals),Peer-reviewed paper recommendations from others in my field (including via Twitter feeds)		Reading peer-reviewed papers from that discipline,Reading synthesis papers from peer-reviewed literature,Contacting a colleague in that discipline,A research network, i.e. the Earth Science Research Network		Easy	Yes	Very familiar	Reading synthesis papers from peer-reviewed literature		Somewhat easy	1 - 3 papers per year	1 - 3 papers per year	4 - 12 papers per year	A few times (x2)	A few times (x2)	Not Easy; Not Challenging	Mature [We understand the underlying mechanisms, and have adequate techniques for monitoring, but there are a few areas where improvements are needed]	Starting [We are just beginning to understand what is going on]	Starting [We are just beginning to understand what is going on]	>10 years	Rarely	Problems in the structure of the management agency (i.e. laws and regulations restrict the management organization or agency in using new science)		Problems in the structure of the management agency (i.e. laws and regulations restrict the management organization or agency in using new science)	ACADEMIC		Senior (20 yrs +)	2021-05-09	Prefer not to say		Prefer not to say	United States of America
100	732	TRUE	2021-03-11 15:38:14	Less than 10	11 to 50	11 to 50	11 to 50	11 to 50	51 and above	Social Science	Natural Resource Management		Very familiar	Very familiar	Moderately well	Yes	Extremely familiar	Regularly reading a particular peer-reviewed journal (or set of journals),Peer-reviewed paper recommendations from others in my field (including via Twitter feeds),Professional conferences,Ad-hoc through paper reviews or literature reviews for a paper I'm writing,Personal communication, i.e. just talking to someone about a field,Non peer-reviewed material, i.e. news articles, websites and blogs		Reading peer-reviewed papers from that discipline,Reading synthesis papers from peer-reviewed literature,Contacting a colleague in that discipline,Google non-peer reviewed material, i.e. news articles, blogs etc.,Attend a conference,Textbooks, or other education materials		Somewhat easy	Yes	Moderately familiar	Contacting a colleague in that discipline		Neither easy nor difficult	1 - 3 papers per year	1 - 3 papers per year	1 - 3 papers per year	A few times (x2)	A few times (x2)	Challenging	Mature [We understand the underlying mechanisms, and have adequate techniques for monitoring, but there are a few areas where improvements are needed]	Mature [We understand the underlying mechanisms, and have adequate techniques for monitoring, but there are a few areas where improvements are needed]	Developing [We understand the basics, but fundamental sources of uncertainty remain]	Within a few years	Sometimes	A lack of synthesis,A lack of staff/personnel,Problems in the structure of the management agency (i.e. laws and regulations restrict the management organization or agency in using new science),Other	Frequently science is not designed with direct input from managers. As a result, results and conclusions are not formulated or communicated in management-ready terms. We need tools that allow managers to apply results directly to answer the questions they have (not the questions we think they have).	A lack of synthesis	ACADEMIC		Early career (1 - 10 yrs)	20-49	White		Male	United States of America
100	600	TRUE	2021-03-11 15:38:41	Less than 10	Less than 10	Less than 10	Less than 10	Less than 10	Less than 10	Earth Science	Water Resource Management		Slightly familiar	Slightly familiar	Moderately well	Yes	Slightly familiar	Peer-reviewed paper recommendations from others in my field (including via Twitter feeds),Professional conferences,Personal communication, i.e. just talking to someone about a field,Non peer-reviewed material, i.e. news articles, websites and blogs		Reading peer-reviewed papers from that discipline,Reading synthesis papers from peer-reviewed literature,Contacting a colleague in that discipline,Google non-peer reviewed material, i.e. news articles, blogs etc.,Attend a conference		Somewhat easy	Yes	Slightly familiar	Reading peer-reviewed papers from that discipline		Somewhat easy	None	None	None	Several times (x3)	A few times (x2)	I have never needed to do this	Mature [We understand the underlying mechanisms, and have adequate techniques for monitoring, but there are a few areas where improvements are needed]	Mature [We understand the underlying mechanisms, and have adequate techniques for monitoring, but there are a few areas where improvements are needed]	Developing [We understand the basics, but fundamental sources of uncertainty remain]	>5 years	Sometimes	A lack of synthesis,A lack of staff/personnel,Problems in the structure of the management agency (i.e. laws and regulations restrict the management organization or agency in using new science)		Problems in the structure of the management agency (i.e. laws and regulations restrict the management organization or agency in using new science)	PRIVATE-NOT-FOR-PROFIT, tax-exempt, charitable organization		Mid career (10 - 20 yrs)	2021-10-19	White		Male	United States of America
100	519	TRUE	2021-03-11 15:42:24	Less than 10	51 and above	Less than 10	Less than 10	11 to 50	Less than 10	Life Science	Other	Ichthyology	Extremely familiar	Extremely familiar	Moderately well	Yes	Very familiar	Regularly reading a particular peer-reviewed journal (or set of journals),Peer-reviewed paper recommendations from others in my field (including via Twitter feeds),Professional conferences,Ad-hoc through paper reviews or literature reviews for a paper I'm writing,Personal communication, i.e. just talking to someone about a field		Reading peer-reviewed papers from that discipline,Reading synthesis papers from peer-reviewed literature,Wikipedia,Contacting a colleague in that discipline,Google non-peer reviewed material, i.e. news articles, blogs etc.,Attend a conference,A research network, i.e. the Earth Science Research Network		Easy	Yes	Extremely familiar	Reading synthesis papers from peer-reviewed literature		Somewhat easy	1 - 3 papers per year	1 - 3 papers per year	1 - 3 papers per year	A few times (x2)	Once	Somewhat Easy	Developing [We understand the basics, but much additional science or technique development is required to address some fundamental sources of uncertainty]	Developing [We understand the basics, but much additional science or technique development is required to address some fundamental sources of uncertainty]	Developing [We understand the basics, but fundamental sources of uncertainty remain]	Within a few years	Sometimes	Too many sources of information,A lack of synthesis,A lack of consensus within the science community,A lack of staff/personnel,Problems in the structure of the management agency (i.e. laws and regulations restrict the management organization or agency in using new science)		A lack of synthesis	ACADEMIC		Senior (20 yrs +)	100-249	White		Male	United States of America
100	604	TRUE	2021-03-11 15:47:36	11 to 50	Less than 10	None	11 to 50	11 to 50	11 to 50	Earth Science	Natural Resource Management		Slightly familiar	Slightly familiar	Moderately well	Yes	Moderately familiar	Peer-reviewed paper recommendations from others in my field (including via Twitter feeds),Professional conferences,Personal communication, i.e. just talking to someone about a field,Non peer-reviewed material, i.e. news articles, websites and blogs		Reading peer-reviewed papers from that discipline,Contacting a colleague in that discipline,Attend a conference,A research network, i.e. the Earth Science Research Network		Somewhat easy	Yes	Very familiar	Reading synthesis papers from peer-reviewed literature		Easy	None	None	None	Several times (x3)	Several times (x3)	Somewhat Challenging	Mature [We understand the underlying mechanisms, and have adequate techniques for monitoring, but there are a few areas where improvements are needed]	Developing [We understand the basics, but much additional science or technique development is required to address some fundamental sources of uncertainty]	Starting [We are just beginning to understand what is going on]	Within a few years	Frequently	A lack of consensus within the science community,A lack of staff/personnel,Problems in the structure of the management agency (i.e. laws and regulations restrict the management organization or agency in using new science)		Other	Local GOVERNMENT employee (city, county, etc.)		Mid career (10 - 20 yrs)	2021-05-09	Prefer not to say		Prefer not to say	United States of America
100	376	TRUE	2021-03-11 15:55:59	11 to 50	Less than 10	Less than 10	11 to 50	Less than 10	Less than 10	Earth Science	Natural Resource Management		Slightly familiar	Not familiar at all	Poorly	Yes	Slightly familiar	Peer-reviewed paper recommendations from others in my field (including via Twitter feeds),Personal communication, i.e. just talking to someone about a field,If "other", please tell us what you use:	Google Machine Random Questions	Reading synthesis papers from peer-reviewed literature,Wikipedia,Contacting a colleague in that discipline,Google non-peer reviewed material, i.e. news articles, blogs etc.,Textbooks, or other education materials		Neither easy nor difficult	Yes	Slightly familiar	Contacting a colleague in that discipline		Somewhat difficult	None	1 - 3 papers per year	None	Many times (>4)	Several times (x3)	I have never needed to do this	Mature [We understand the underlying mechanisms, and have adequate techniques for monitoring, but there are a few areas where improvements are needed]	Mature [We understand the underlying mechanisms, and have adequate techniques for monitoring, but there are a few areas where improvements are needed]	I do not know	I do not know	I do not know	A lack of synthesis,A lack of staff/personnel,Problems in the structure of the management agency (i.e. laws and regulations restrict the management organization or agency in using new science)		Problems in the structure of the management agency (i.e. laws and regulations restrict the management organization or agency in using new science)	Federal GOVERNMENT employee		Early career (1 - 10 yrs)	2021-10-19	Prefer not to say		Prefer not to say	United States of America
100	580	TRUE	2021-03-11 16:24:16	Less than 10	Less than 10	None	11 to 50	11 to 50	None	Earth Science	Natural Resource Management		Slightly familiar	Moderately familiar	Moderately well	Yes	Very familiar	Non peer-reviewed material, i.e. news articles, websites and blogs		Reading peer-reviewed papers from that discipline		Neither easy nor difficult	Yes	Very familiar	Google non-peer reviewed material		Neither easy nor difficult	None	None	None	A few times (x2)	A few times (x2)	Somewhat Challenging	Mature [We understand the underlying mechanisms, and have adequate techniques for monitoring, but there are a few areas where improvements are needed]	Developing [We understand the basics, but much additional science or technique development is required to address some fundamental sources of uncertainty]	Developing [We understand the basics, but fundamental sources of uncertainty remain]	>5 years	Sometimes	A lack of access to information		Problems in the structure of the management agency (i.e. laws and regulations restrict the management organization or agency in using new science)	Local GOVERNMENT employee (city, county, etc.)		Early career (1 - 10 yrs)	2021-05-09	White		Female	United States of America
100	316	TRUE	2021-03-11 16:26:25			Less than 10			51 and above	Social Science	Natural Resource Management		Slightly familiar	Slightly familiar	Poorly	No		Ad-hoc through paper reviews or literature reviews for a paper I'm writing,Personal communication, i.e. just talking to someone about a field,Non peer-reviewed material, i.e. news articles, websites and blogs		Reading peer-reviewed papers from that discipline,Reading synthesis papers from peer-reviewed literature,Google non-peer reviewed material, i.e. news articles, blogs etc.,Textbooks, or other education materials		Somewhat easy	Yes	Not familiar at all	Google non-peer reviewed material		Somewhat easy	1 - 3 papers per year	1 - 3 papers per year	1 - 3 papers per year	Several times (x3)	A few times (x2)	I have never needed to do this	Mature [We understand the underlying mechanisms, and have adequate techniques for monitoring, but there are a few areas where improvements are needed]	Developing [We understand the basics, but much additional science or technique development is required to address some fundamental sources of uncertainty]	Developing [We understand the basics, but fundamental sources of uncertainty remain]	>5 years	Rarely	Too many sources of information,A lack of synthesis,A lack of consensus within the science community,A lack of staff/personnel		Problems in the structure of the management agency (i.e. laws and regulations restrict the management organization or agency in using new science)	PRIVATE-FOR-PROFIT company, business or individual, for wages, salary or commissions		Mid career (10 - 20 yrs)	2021-10-19	White		Male	United States of America
100	511	TRUE	2021-03-11 16:30:21	Less than 10	None	None	11 to 50	None	None	Earth Science	Natural Resource Management		Slightly familiar	Slightly familiar	Poorly	No		Personal communication, i.e. just talking to someone about a field		Reading peer-reviewed papers from that discipline		Somewhat difficult	Yes	Slightly familiar	If "other", please tell us what you use:	internet search	Somewhat difficult	None	None	None	Many times (>4)	Many times (>4)	Somewhat Challenging	I do not know	Starting [We are just beginning to understand what is going on]	Starting [We are just beginning to understand what is going on]	Not at all	I do not know	A lack of access to information,Problems in the structure of the management agency (i.e. laws and regulations restrict the management organization or agency in using new science)		A lack of access to information	Local GOVERNMENT employee (city, county, etc.)		Senior (20 yrs +)	2021-05-09	White		Male	United States of America
100	658	TRUE	2021-03-11 16:38:33	None	Less than 10	None	Less than 10	11 to 50	Less than 10	Life Science	Aquatic Ecology		Not familiar at all	Slightly familiar	Poorly	No		Non peer-reviewed material, i.e. news articles, websites and blogs		Reading peer-reviewed papers from that discipline,Reading synthesis papers from peer-reviewed literature,Google non-peer reviewed material, i.e. news articles, blogs etc.,Textbooks, or other education materials		Somewhat difficult	Yes	Slightly familiar	Google non-peer reviewed material		Somewhat difficult	None	None	None	Many times (>4)	Many times (>4)	Challenging	I do not know	Developing [We understand the basics, but much additional science or technique development is required to address some fundamental sources of uncertainty]	I do not know	>10 years	Sometimes	A lack of staff/personnel,Problems in the structure of the management agency (i.e. laws and regulations restrict the management organization or agency in using new science)		Problems in the structure of the management agency (i.e. laws and regulations restrict the management organization or agency in using new science)	State GOVERNMENT employee		Early career (1 - 10 yrs)	20-49	Prefer not to say		Female	United States of America
100	530	TRUE	2021-03-11 17:10:31	Less than 10	11 to 50	None	Less than 10	11 to 50	None	Life Science	Aquatic Ecology		Slightly familiar	Moderately familiar	Poorly	Yes	Moderately familiar	Peer-reviewed paper recommendations from others in my field (including via Twitter feeds),Ad-hoc through paper reviews or literature reviews for a paper I'm writing,Non peer-reviewed material, i.e. news articles, websites and blogs		Reading peer-reviewed papers from that discipline,Reading synthesis papers from peer-reviewed literature,Contacting a colleague in that discipline,Textbooks, or other education materials,A research network, i.e. the Earth Science Research Network		Neither easy nor difficult	Yes	Slightly familiar	Google non-peer reviewed material		Somewhat difficult	1 - 3 papers per year	1 - 3 papers per year	4 - 12 papers per year	Several times (x3)	Many times (>4)	Challenging	Developing [We understand the basics, but much additional science or technique development is required to address some fundamental sources of uncertainty]	Starting [We are just beginning to understand what is going on]	Starting [We are just beginning to understand what is going on]	>5 years	Rarely	A lack of consensus within the science community,A lack of staff/personnel,Problems in the structure of the management agency (i.e. laws and regulations restrict the management organization or agency in using new science)		Other	State GOVERNMENT employee		Early career (1 - 10 yrs)	1000 or more	White		Male	United States of America
100	1125	TRUE	2021-03-11 17:54:58	Less than 10	None	None	11 to 50	Less than 10	Less than 10	Earth Science	Natural Resource Management		Slightly familiar	Moderately familiar	Poorly	Yes	Moderately familiar	Peer-reviewed paper recommendations from others in my field (including via Twitter feeds),Personal communication, i.e. just talking to someone about a field,Non peer-reviewed material, i.e. news articles, websites and blogs		Contacting a colleague in that discipline,Google non-peer reviewed material, i.e. news articles, blogs etc.,Textbooks, or other education materials		Neither easy nor difficult	Yes	Not familiar at all	Contacting a colleague in that discipline		Somewhat difficult	None	None	None	A few times (x2)	A few times (x2)	Challenging	Mature [We understand the underlying mechanisms, and have adequate techniques for monitoring, but there are a few areas where improvements are needed]	Developing [We understand the basics, but much additional science or technique development is required to address some fundamental sources of uncertainty]	Developing [We understand the basics, but fundamental sources of uncertainty remain]	>5 years	Sometimes	Problems in the structure of the management agency (i.e. laws and regulations restrict the management organization or agency in using new science)		Other	Federal GOVERNMENT employee		Senior (20 yrs +)	2021-05-09	Other (please specify)	European	Male	United States of America
100	645	TRUE	2021-03-11 18:21:20	None	None	None	11 to 50	Less than 10	Less than 10	Earth Science	Environmental Politics and Policy		Slightly familiar	Slightly familiar	Moderately well	No		Peer-reviewed paper recommendations from others in my field (including via Twitter feeds),Professional conferences,Ad-hoc through paper reviews or literature reviews for a paper I'm writing,Personal communication, i.e. just talking to someone about a field,Non peer-reviewed material, i.e. news articles, websites and blogs		Reading peer-reviewed papers from that discipline,Reading synthesis papers from peer-reviewed literature,Contacting a colleague in that discipline,Google non-peer reviewed material, i.e. news articles, blogs etc.,Attend a conference,Textbooks, or other education materials,A research network, i.e. the Earth Science Research Network		Neither easy nor difficult	Yes	Not familiar at all	Contacting a colleague in that discipline		Neither easy nor difficult	None	None	None	Once	A few times (x2)	I have never needed to do this	I do not know	Mature [We understand the underlying mechanisms, and have adequate techniques for monitoring, but there are a few areas where improvements are needed]	Mature [We understand the underlying mechanisms, but there is room for improvement]	I do not know	Frequently	Other	lack of leadership	Other	Local GOVERNMENT employee (city, county, etc.)		Early career (1 - 10 yrs)	1000 or more	White		Female	United States of America
100	536	TRUE	2021-03-11 18:54:31	11 to 50		11 to 50	51 and above	11 to 50	51 and above	Social Science	Environmental Economics		Slightly familiar	Slightly familiar	Poorly	Yes	Very familiar	If "other", please tell us what you use:	Selected papers from a set of journal TOCs delivered by email	Reading peer-reviewed papers from that discipline,Reading synthesis papers from peer-reviewed literature		Somewhat easy	Yes	Slightly familiar	Google scholar		Somewhat easy	1 - 3 papers per year	1 - 3 papers per year	4 - 12 papers per year	A few times (x2)	A few times (x2)	Not Easy; Not Challenging	Developing [We understand the basics, but much additional science or technique development is required to address some fundamental sources of uncertainty]	Developing [We understand the basics, but much additional science or technique development is required to address some fundamental sources of uncertainty]	Starting [We are just beginning to understand what is going on]	>10 years	Sometimes	Other	Insufficiently fit for purpose and capability / capacity limitations in management agency	Other	ACADEMIC		Senior (20 yrs +)	1000 or more	Prefer not to say		Male	Australia
100	505	TRUE	2021-03-11 21:49:20	Less than 10	Less than 10	Less than 10	11 to 50	11 to 50	Less than 10	Life Science	Natural Resource Management		Slightly familiar	Moderately familiar	Moderately well	No		Peer-reviewed paper recommendations from others in my field (including via Twitter feeds),Professional conferences,Ad-hoc through paper reviews or literature reviews for a paper I'm writing,Personal communication, i.e. just talking to someone about a field,Non peer-reviewed material, i.e. news articles, websites and blogs		Reading synthesis papers from peer-reviewed literature,Contacting a colleague in that discipline,Attend a conference		Somewhat easy	Yes	Moderately familiar	Reading synthesis papers from peer-reviewed literature		Neither easy nor difficult	None	1 - 3 papers per year	1 - 3 papers per year	Once	Once	I have never needed to do this	Mature [We understand the underlying mechanisms, and have adequate techniques for monitoring, but there are a few areas where improvements are needed]	Mature [We understand the underlying mechanisms, and have adequate techniques for monitoring, but there are a few areas where improvements are needed]	Developing [We understand the basics, but fundamental sources of uncertainty remain]	>5 years	Sometimes	Too many sources of information,A lack of access to information,A lack of synthesis,A lack of staff/personnel,Problems in the structure of the management agency (i.e. laws and regulations restrict the management organization or agency in using new science)		A lack of synthesis	RETIRED	Federal GOVERNMENT employee	Senior (20 yrs +)	250-499	Asian Indian		Male	United States of America
100	630	TRUE	2021-03-11 22:18:44	Less than 10	Less than 10	Less than 10	Less than 10	11 to 50	Less than 10	Earth Science	Water Resource Management		Slightly familiar	Slightly familiar	Moderately well	Yes	Moderately familiar	Professional conferences,Personal communication, i.e. just talking to someone about a field,Non peer-reviewed material, i.e. news articles, websites and blogs,If "other", please tell us what you use:	white papers, government reports	Contacting a colleague in that discipline		Neither easy nor difficult	Yes	Slightly familiar	Contacting a colleague in that discipline		Neither easy nor difficult	None	None	None	A few times (x2)	A few times (x2)	I have never needed to do this	Mature [We understand the underlying mechanisms, and have adequate techniques for monitoring, but there are a few areas where improvements are needed]	Developing [We understand the basics, but much additional science or technique development is required to address some fundamental sources of uncertainty]	Mature [We understand the underlying mechanisms, but there is room for improvement]	Within a few years	I do not know	Problems in the structure of the management agency (i.e. laws and regulations restrict the management organization or agency in using new science)		Problems in the structure of the management agency (i.e. laws and regulations restrict the management organization or agency in using new science)	PRIVATE-NOT-FOR-PROFIT, tax-exempt, charitable organization		Early career (1 - 10 yrs)	250-499	White		Male	United States of America
22	139	FALSE	2021-03-12 02:04:35	None	Less than 10	11 to 50	None	Less than 10	11 to 50	Earth Science	Mathematics/Statistics		Moderately familiar	Very familiar	Moderately well	No
100	493	TRUE	2021-03-12 04:08:49	11 to 50	11 to 50	11 to 50	11 to 50	11 to 50	11 to 50	Social Science	Environmental Economics		Slightly familiar	Moderately familiar	Moderately well	Yes	Very familiar	Regularly reading a particular peer-reviewed journal (or set of journals),Ad-hoc through paper reviews or literature reviews for a paper I'm writing		Reading peer-reviewed papers from that discipline,Reading synthesis papers from peer-reviewed literature,Contacting a colleague in that discipline,Attend a conference,Textbooks, or other education materials		Somewhat easy	Yes	Slightly familiar	Google scholar		Neither easy nor difficult	1 - 3 papers per year	1 - 3 papers per year	4 - 12 papers per year	Several times (x3)	Several times (x3)	Challenging	I do not know	Developing [We understand the basics, but much additional science or technique development is required to address some fundamental sources of uncertainty]	Developing [We understand the basics, but fundamental sources of uncertainty remain]	>5 years	Sometimes	A lack of synthesis		A lack of synthesis	ACADEMIC		Mid career (10 - 20 yrs)	20-49	White		Male	United States of America
11	201	FALSE	2021-03-12 06:47:26	Less than 10	Less than 10	Less than 10	Less than 10	11 to 50	Less than 10	Life Science	Other	education
100	1030	TRUE	2021-03-12 08:41:57	None	None	None	11 to 50	Less than 10	None	Earth Science	Natural Resource Management		Slightly familiar	Moderately familiar	Moderately well	Yes	Moderately familiar	Peer-reviewed paper recommendations from others in my field (including via Twitter feeds),Personal communication, i.e. just talking to someone about a field,Non peer-reviewed material, i.e. news articles, websites and blogs		Reading peer-reviewed papers from that discipline,Reading synthesis papers from peer-reviewed literature,Contacting a colleague in that discipline		Somewhat difficult	Yes	Moderately familiar	Google non-peer reviewed material		Somewhat difficult	None	None	None	Several times (x3)	A few times (x2)	Not Easy; Not Challenging	Mature [We understand the underlying mechanisms, and have adequate techniques for monitoring, but there are a few areas where improvements are needed]	Advanced [We can quantify the uncertainty and know the driving mechanisms]	Mature [We understand the underlying mechanisms, but there is room for improvement]	Within a few years	Sometimes	Problems in the structure of the management agency (i.e. laws and regulations restrict the management organization or agency in using new science)		Problems in the structure of the management agency (i.e. laws and regulations restrict the management organization or agency in using new science)	PRIVATE-NOT-FOR-PROFIT, tax-exempt, charitable organization		Mid career (10 - 20 yrs)	2021-05-09	White		Female	United States of America
100	462	TRUE	2021-03-12 09:32:54	Less than 10	None	None	Less than 10	Less than 10	Less than 10	Earth Science	Natural Resource Management		Not familiar at all	Not familiar at all	Poorly	Yes	Slightly familiar	Professional conferences,Personal communication, i.e. just talking to someone about a field		Contacting a colleague in that discipline,Attend a conference,Textbooks, or other education materials,A research network, i.e. the Earth Science Research Network		Neither easy nor difficult	Yes	Slightly familiar	Contacting a colleague in that discipline		Neither easy nor difficult	None	None	None	A few times (x2)	A few times (x2)	Somewhat Challenging	Mature [We understand the underlying mechanisms, and have adequate techniques for monitoring, but there are a few areas where improvements are needed]	Mature [We understand the underlying mechanisms, and have adequate techniques for monitoring, but there are a few areas where improvements are needed]	Mature [We understand the underlying mechanisms, but there is room for improvement]	Within a few years	Sometimes	Too many sources of information,A lack of synthesis,A lack of staff/personnel		A lack of access to information	Federal GOVERNMENT employee		Mid career (10 - 20 yrs)	2021-10-19	American Indian or Alaska Native		Male	United States of America
100	447	TRUE	2021-03-12 09:42:33	None	None	None	None	Less than 10	None	Life Science	Natural Resource Management		Not familiar at all	Not familiar at all	Poorly	No		Personal communication, i.e. just talking to someone about a field,Non peer-reviewed material, i.e. news articles, websites and blogs		Wikipedia,Contacting a colleague in that discipline,Google non-peer reviewed material, i.e. news articles, blogs etc.,Attend a conference,Textbooks, or other education materials		Neither easy nor difficult	No		Attend a conference		Neither easy nor difficult	None	None	None	I do not read the peer-reviewed literature	I do not read the peer-reviewed literature	I have never needed to do this	Developing [We understand the basics, but much additional science or technique development is required to address some fundamental sources of uncertainty]	I do not know	I do not know	I do not know	I do not know	I do not know		I do not know	Local GOVERNMENT employee (city, county, etc.)		Senior (20 yrs +)	2021-01-04	White		Male	United States of America
100	634	TRUE	2021-03-12 09:43:51	11 to 50	None	None	51 and above	11 to 50	11 to 50	Earth Science	Natural Resource Management		Moderately familiar	Very familiar	Very well	Yes	Extremely familiar	Regularly reading a particular peer-reviewed journal (or set of journals),Peer-reviewed paper recommendations from others in my field (including via Twitter feeds),Professional conferences,Ad-hoc through paper reviews or literature reviews for a paper I'm writing,Personal communication, i.e. just talking to someone about a field,Non peer-reviewed material, i.e. news articles, websites and blogs		Reading peer-reviewed papers from that discipline,Reading synthesis papers from peer-reviewed literature,Contacting a colleague in that discipline,Textbooks, or other education materials		Neither easy nor difficult	Yes	Moderately familiar	Contacting a colleague in that discipline		Somewhat difficult	None	1 - 3 papers per year	None	A few times (x2)	Several times (x3)	Not Easy; Not Challenging	Mature [We understand the underlying mechanisms, and have adequate techniques for monitoring, but there are a few areas where improvements are needed]	Mature [We understand the underlying mechanisms, and have adequate techniques for monitoring, but there are a few areas where improvements are needed]	Mature [We understand the underlying mechanisms, but there is room for improvement]	>5 years	Sometimes	A lack of synthesis,A lack of staff/personnel,Problems in the structure of the management agency (i.e. laws and regulations restrict the management organization or agency in using new science)		A lack of staff/personnel	PRIVATE-NOT-FOR-PROFIT, tax-exempt, charitable organization		Mid career (10 - 20 yrs)	2021-10-19	White		Male	United States of America
100	584	TRUE	2021-03-12 10:08:41	11 to 50	11 to 50	Less than 10	51 and above	51 and above	Less than 10	Life Science	Natural Resource Management		Very familiar	Very familiar	Moderately well	Yes	Very familiar	Regularly reading a particular peer-reviewed journal (or set of journals),Peer-reviewed paper recommendations from others in my field (including via Twitter feeds),Professional conferences,Ad-hoc through paper reviews or literature reviews for a paper I'm writing,Personal communication, i.e. just talking to someone about a field,Non peer-reviewed material, i.e. news articles, websites and blogs		Reading peer-reviewed papers from that discipline,Reading synthesis papers from peer-reviewed literature,Contacting a colleague in that discipline,Attend a conference,Textbooks, or other education materials		Neither easy nor difficult	Yes	Moderately familiar	Reading synthesis papers from peer-reviewed literature		Neither easy nor difficult	None	None	1 - 3 papers per year	Several times (x3)	A few times (x2)	Somewhat Challenging	Developing [We understand the basics, but much additional science or technique development is required to address some fundamental sources of uncertainty]	Developing [We understand the basics, but much additional science or technique development is required to address some fundamental sources of uncertainty]	Developing [We understand the basics, but fundamental sources of uncertainty remain]	>5 years	Rarely	Other	Science interferes with the economic interests or politics of the funding organization (capitalism)	Other	State GOVERNMENT employee		Mid career (10 - 20 yrs)	1000 or more	Other (please specify)	Chicano	Male	United States of America
100	596	TRUE	2021-03-12 10:09:00	11 to 50	11 to 50	11 to 50	11 to 50	11 to 50	11 to 50	Earth Science	Environmental Politics and Policy		Moderately familiar	Very familiar	Moderately well	Yes	Extremely familiar	If "other", please tell us what you use:	Government Policy and Rulemaking	If "other", please tell us what you use:	state and federal agency websites	Neither easy nor difficult	Yes	Moderately familiar	Reading peer-reviewed papers from that discipline		Neither easy nor difficult	None	None	None	Once	A few times (x2)	I have never needed to do this	Developing [We understand the basics, but much additional science or technique development is required to address some fundamental sources of uncertainty]	Developing [We understand the basics, but much additional science or technique development is required to address some fundamental sources of uncertainty]	Starting [We are just beginning to understand what is going on]	Within a few years	I do not know	Problems in the structure of the management agency (i.e. laws and regulations restrict the management organization or agency in using new science)		Problems in the structure of the management agency (i.e. laws and regulations restrict the management organization or agency in using new science)	Local GOVERNMENT employee (city, county, etc.)		Senior (20 yrs +)	2021-05-09	White		Female	United States of America
100	1266	TRUE	2021-03-12 10:16:57	Less than 10			Less than 10			Earth Science	Natural Resource Management		Moderately familiar	Moderately familiar	Moderately well	Yes	Moderately familiar	Professional conferences,Personal communication, i.e. just talking to someone about a field,Non peer-reviewed material, i.e. news articles, websites and blogs		Reading synthesis papers from peer-reviewed literature,Contacting a colleague in that discipline,Attend a conference,Textbooks, or other education materials		Somewhat easy	Yes	Very familiar	Textbooks, or other educational materials		Somewhat difficult	None	None	None	A few times (x2)	A few times (x2)	I have never needed to do this	Mature [We understand the underlying mechanisms, and have adequate techniques for monitoring, but there are a few areas where improvements are needed]	Developing [We understand the basics, but much additional science or technique development is required to address some fundamental sources of uncertainty]	Mature [We understand the underlying mechanisms, but there is room for improvement]	>5 years	Sometimes	Problems in the structure of the management agency (i.e. laws and regulations restrict the management organization or agency in using new science)		Problems in the structure of the management agency (i.e. laws and regulations restrict the management organization or agency in using new science)	RETIRED	State GOVERNMENT employee	Senior (20 yrs +)	100-249	White		Male	United States of America
100	1038	TRUE	2021-03-12 10:41:18	Less than 10			11 to 50			Earth Science	Water Resource Management		Slightly familiar	Slightly familiar	Poorly	Yes	Moderately familiar	Peer-reviewed paper recommendations from others in my field (including via Twitter feeds),Professional conferences,Personal communication, i.e. just talking to someone about a field,Non peer-reviewed material, i.e. news articles, websites and blogs,If "other", please tell us what you use:	The Water Report	Reading peer-reviewed papers from that discipline,Reading synthesis papers from peer-reviewed literature,Contacting a colleague in that discipline,Attend a conference,Textbooks, or other education materials		Neither easy nor difficult	Yes	Slightly familiar	Contacting a colleague in that discipline		Somewhat difficult	None	None	None	Several times (x3)	Several times (x3)	Challenging	Developing [We understand the basics, but much additional science or technique development is required to address some fundamental sources of uncertainty]	Mature [We understand the underlying mechanisms, and have adequate techniques for monitoring, but there are a few areas where improvements are needed]	Mature [We understand the underlying mechanisms, but there is room for improvement]	>5 years	Frequently	Too many sources of information,A lack of access to information,A lack of synthesis,A lack of staff/personnel,Problems in the structure of the management agency (i.e. laws and regulations restrict the management organization or agency in using new science)		A lack of staff/personnel	State GOVERNMENT employee		Mid career (10 - 20 yrs)	100-249	White		Male	United States of America
100	980	TRUE	2021-03-12 11:42:36	Less than 10	11 to 50	Less than 10	Less than 10	51 and above	Less than 10	Life Science	Aquatic Ecology		Very familiar	Very familiar	Moderately well	Yes	Very familiar	Regularly reading a particular peer-reviewed journal (or set of journals),Peer-reviewed paper recommendations from others in my field (including via Twitter feeds),Ad-hoc through paper reviews or literature reviews for a paper I'm writing,If "other", please tell us what you use:	Google Scholar searches	Reading peer-reviewed papers from that discipline,Reading synthesis papers from peer-reviewed literature,Contacting a colleague in that discipline,Attend a conference		Somewhat easy	Yes	Slightly familiar	Reading peer-reviewed papers from that discipline		Neither easy nor difficult	1 - 3 papers per year	1 - 3 papers per year	13 - 49 papers per year	A few times (x2)	A few times (x2)	Somewhat Challenging	Developing [We understand the basics, but much additional science or technique development is required to address some fundamental sources of uncertainty]	Developing [We understand the basics, but much additional science or technique development is required to address some fundamental sources of uncertainty]	Developing [We understand the basics, but fundamental sources of uncertainty remain]	>5 years	Sometimes	Too many sources of information,A lack of synthesis,A lack of consensus within the science community,Problems in the structure of the management agency (i.e. laws and regulations restrict the management organization or agency in using new science)		Problems in the structure of the management agency (i.e. laws and regulations restrict the management organization or agency in using new science)	ACADEMIC		Senior (20 yrs +)	2021-10-19	White		Male	United States of America
100	508	TRUE	2021-03-12 12:21:09	Less than 10	Less than 10	Less than 10	11 to 50	11 to 50	11 to 50	Earth Science	Environmental Politics and Policy		Moderately familiar	Very familiar	Moderately well	Yes	Very familiar	Professional conferences,Ad-hoc through paper reviews or literature reviews for a paper I'm writing,Personal communication, i.e. just talking to someone about a field,Non peer-reviewed material, i.e. news articles, websites and blogs		Reading synthesis papers from peer-reviewed literature,Contacting a colleague in that discipline,Google non-peer reviewed material, i.e. news articles, blogs etc.,Attend a conference,Textbooks, or other education materials,A research network, i.e. the Earth Science Research Network		Neither easy nor difficult	Yes	Extremely familiar	Google non-peer reviewed material		Somewhat easy	None	None	None	A few times (x2)	A few times (x2)	I have never needed to do this	Mature [We understand the underlying mechanisms, and have adequate techniques for monitoring, but there are a few areas where improvements are needed]	Developing [We understand the basics, but much additional science or technique development is required to address some fundamental sources of uncertainty]	Mature [We understand the underlying mechanisms, but there is room for improvement]	Within a few years	Sometimes	Too many sources of information,A lack of synthesis,A lack of staff/personnel,Problems in the structure of the management agency (i.e. laws and regulations restrict the management organization or agency in using new science)		Problems in the structure of the management agency (i.e. laws and regulations restrict the management organization or agency in using new science)	PRIVATE-NOT-FOR-PROFIT, tax-exempt, charitable organization		Mid career (10 - 20 yrs)	2021-01-04	White		Male	United States of America
100	415	TRUE	2021-03-12 12:22:02	Less than 10	None	None	11 to 50	None	None	Earth Science	Environmental Engineering		Slightly familiar	Slightly familiar	Moderately well	Yes	Slightly familiar	Professional conferences,Ad-hoc through paper reviews or literature reviews for a paper I'm writing,Personal communication, i.e. just talking to someone about a field,Non peer-reviewed material, i.e. news articles, websites and blogs		Reading peer-reviewed papers from that discipline,Reading synthesis papers from peer-reviewed literature,Contacting a colleague in that discipline,Google non-peer reviewed material, i.e. news articles, blogs etc.,Attend a conference,Textbooks, or other education materials		Neither easy nor difficult	No		Contacting a colleague in that discipline		Neither easy nor difficult	None	None	None	A few times (x2)	A few times (x2)	I have never needed to do this	Developing [We understand the basics, but much additional science or technique development is required to address some fundamental sources of uncertainty]	Developing [We understand the basics, but much additional science or technique development is required to address some fundamental sources of uncertainty]	Developing [We understand the basics, but fundamental sources of uncertainty remain]	>5 years	Rarely	A lack of consensus within the science community		A lack of consensus within the science community	Local GOVERNMENT employee (city, county, etc.)		Mid career (10 - 20 yrs)	250-499	American Indian or Alaska Native		Female	United States of America
100	686	TRUE	2021-03-12 12:31:11	None	None	None	Less than 10	Less than 10	None	Earth Science	Natural Resource Management		Not familiar at all	Slightly familiar	Moderately well	Yes	Moderately familiar	Professional conferences,Personal communication, i.e. just talking to someone about a field,Non peer-reviewed material, i.e. news articles, websites and blogs		Reading peer-reviewed papers from that discipline,Contacting a colleague in that discipline,Attend a conference,A research network, i.e. the Earth Science Research Network		Somewhat easy	Yes	Not familiar at all	Google non-peer reviewed material		Neither easy nor difficult	None	None	None	Several times (x3)	Several times (x3)	I have never needed to do this	Developing [We understand the basics, but much additional science or technique development is required to address some fundamental sources of uncertainty]	Mature [We understand the underlying mechanisms, and have adequate techniques for monitoring, but there are a few areas where improvements are needed]	Mature [We understand the underlying mechanisms, but there is room for improvement]	Within a few years	I do not know	A lack of access to information,A lack of synthesis,Problems in the structure of the management agency (i.e. laws and regulations restrict the management organization or agency in using new science)		Problems in the structure of the management agency (i.e. laws and regulations restrict the management organization or agency in using new science)	Local GOVERNMENT employee (city, county, etc.)		Early career (1 - 10 yrs)	2021-05-09	White		Female	United States of America
100	717	TRUE	2021-03-12 15:58:00	Less than 10	Less than 10	Less than 10	11 to 50	Less than 10	11 to 50	Social Science	Environmental Politics and Policy		Slightly familiar	Slightly familiar	Moderately well	No		Peer-reviewed paper recommendations from others in my field (including via Twitter feeds),Personal communication, i.e. just talking to someone about a field,Non peer-reviewed material, i.e. news articles, websites and blogs,If "other", please tell us what you use:	Professional meetings	Contacting a colleague in that discipline,Google non-peer reviewed material, i.e. news articles, blogs etc.		Neither easy nor difficult	Yes	Slightly familiar	Contacting a colleague in that discipline		Neither easy nor difficult	None	None	None	Several times (x3)	A few times (x2)	I have never needed to do this	Developing [We understand the basics, but much additional science or technique development is required to address some fundamental sources of uncertainty]	Developing [We understand the basics, but much additional science or technique development is required to address some fundamental sources of uncertainty]	Mature [We understand the underlying mechanisms, but there is room for improvement]	>5 years	Frequently	A lack of synthesis,A lack of consensus within the science community,A lack of staff/personnel,Problems in the structure of the management agency (i.e. laws and regulations restrict the management organization or agency in using new science)		Problems in the structure of the management agency (i.e. laws and regulations restrict the management organization or agency in using new science)	Federal GOVERNMENT employee		Mid career (10 - 20 yrs)	1000 or more	White		Male	United States of America
100	702	TRUE	2021-03-12 17:19:37	Less than 10	Less than 10	Less than 10	Less than 10	Less than 10	Less than 10	Earth Science	Natural Resource Management		Moderately familiar	Moderately familiar	Moderately well	Yes	Very familiar	Regularly reading a particular peer-reviewed journal (or set of journals),Peer-reviewed paper recommendations from others in my field (including via Twitter feeds),Professional conferences,Personal communication, i.e. just talking to someone about a field		Reading peer-reviewed papers from that discipline,Reading synthesis papers from peer-reviewed literature,Contacting a colleague in that discipline,Attend a conference,A research network, i.e. the Earth Science Research Network		Neither easy nor difficult	Yes	Moderately familiar	Reading peer-reviewed papers from that discipline		Neither easy nor difficult	None	None	1 - 3 papers per year	A few times (x2)	A few times (x2)	I have never needed to do this	Mature [We understand the underlying mechanisms, and have adequate techniques for monitoring, but there are a few areas where improvements are needed]	Developing [We understand the basics, but much additional science or technique development is required to address some fundamental sources of uncertainty]	Developing [We understand the basics, but fundamental sources of uncertainty remain]	Within a few years	Sometimes	A lack of consensus within the science community,Problems in the structure of the management agency (i.e. laws and regulations restrict the management organization or agency in using new science)		A lack of consensus within the science community	State GOVERNMENT employee		Senior (20 yrs +)	500-999	White		Male	United States of America
22	40985	FALSE	2021-03-12 18:21:32	11 to 50	Less than 10	Less than 10	51 and above	51 and above	51 and above	Earth Science	Hydrology		Moderately familiar	Very familiar	Moderately well	Yes
59	309	FALSE	2021-03-12 19:09:11	Less than 10	None	None	11 to 50	Less than 10	Less than 10	Earth Science	Water Resource Management		Slightly familiar	Moderately familiar	Moderately well	No		Peer-reviewed paper recommendations from others in my field (including via Twitter feeds),Professional conferences,Personal communication, i.e. just talking to someone about a field		Reading peer-reviewed papers from that discipline,Contacting a colleague in that discipline		Somewhat easy	No		Contacting a colleague in that discipline		Somewhat easy	None	None	None	Several times (x3)	Several times (x3)	Not Easy; Not Challenging
38	153	FALSE	2021-03-13 04:15:36	Less than 10	None	None	Less than 10	None	None	Earth Science	Hydrology		Moderately familiar	Moderately familiar	Moderately well	Yes	Very familiar	Regularly reading a particular peer-reviewed journal (or set of journals)		Reading peer-reviewed papers from that discipline		Somewhat difficult	No
100	283	TRUE	2021-03-13 12:22:26
100	938	TRUE	2021-03-14 09:43:13	None	Less than 10	Less than 10	Less than 10	11 to 50	11 to 50	Life Science	Natural Resource Management		Slightly familiar	Moderately familiar	Poorly	Yes	Moderately familiar	Peer-reviewed paper recommendations from others in my field (including via Twitter feeds),Personal communication, i.e. just talking to someone about a field,Non peer-reviewed material, i.e. news articles, websites and blogs		Reading peer-reviewed papers from that discipline,Contacting a colleague in that discipline		Somewhat easy	Yes	Moderately familiar	Reading peer-reviewed papers from that discipline		Somewhat easy	None	1 - 3 papers per year	1 - 3 papers per year	Several times (x3)	Once	I have never needed to do this	Advanced [We can quantify the uncertainty and know the driving mechanisms]	Mature [We understand the underlying mechanisms, and have adequate techniques for monitoring, but there are a few areas where improvements are needed]	Advanced [We understand the driving mechanisms and can quantify cost and risk reasonably accurately]	>5 years	Sometimes	Too many sources of information,A lack of synthesis,A lack of staff/personnel		A lack of synthesis	Federal GOVERNMENT employee		Senior (20 yrs +)	20-49	White		Female	United States of America
22	435	FALSE	2021-03-14 23:45:11	Less than 10	Less than 10	Less than 10	Less than 10	Less than 10	Less than 10	Life Science	Natural Resource Management		Slightly familiar	Slightly familiar	Moderately well	Yes
100	425	TRUE	2021-03-15 08:11:41	Less than 10	Less than 10	51 and above	11 to 50	11 to 50	51 and above	Social Science	Environmental Economics		Moderately familiar	Very familiar	Very well	Yes	Extremely familiar	Professional conferences,Ad-hoc through paper reviews or literature reviews for a paper I'm writing,Personal communication, i.e. just talking to someone about a field		Reading peer-reviewed papers from that discipline,Reading synthesis papers from peer-reviewed literature,Contacting a colleague in that discipline,Attend a conference,Textbooks, or other education materials		Neither easy nor difficult	Yes	Moderately familiar	Contacting a colleague in that discipline		Somewhat difficult	1 - 3 papers per year	1 - 3 papers per year	1 - 3 papers per year	Many times (>4)	Many times (>4)	Somewhat Challenging	I do not know	I do not know	I do not know	>10 years	Sometimes	A lack of consensus within the science community		A lack of consensus within the science community	Federal GOVERNMENT employee		Early career (1 - 10 yrs)	1000 or more	Other (please specify)		Male	United States of America
100	784	TRUE	2021-03-15 08:52:26	Less than 10	51 and above	11 to 50	Less than 10	51 and above	11 to 50	Life Science	Aquatic Ecology		Moderately familiar	Very familiar		Yes	Very familiar	Peer-reviewed paper recommendations from others in my field (including via Twitter feeds)		Reading peer-reviewed papers from that discipline		Easy	Yes	Slightly familiar	Google scholar		Neither easy nor difficult	None	None	None	A few times (x2)	Several times (x3)	I have never needed to do this	Mature [We understand the underlying mechanisms, and have adequate techniques for monitoring, but there are a few areas where improvements are needed]	Advanced [We can quantify the uncertainty and know the driving mechanisms]	Advanced [We understand the driving mechanisms and can quantify cost and risk reasonably accurately]	Within a few years	Sometimes	A lack of synthesis,A lack of consensus within the science community		A lack of synthesis	State GOVERNMENT employee		Early career (1 - 10 yrs)	250-499	White		Female	United States of America
100	838	TRUE	2021-03-15 09:11:30	None	Less than 10	None	None	Less than 10	None	Life Science	Natural Resource Management		Not familiar at all	Not familiar at all	Moderately well	Yes	Slightly familiar	Personal communication, i.e. just talking to someone about a field		Contacting a colleague in that discipline		Somewhat easy	No		Contacting a colleague in that discipline		Somewhat difficult	None	None	None	Once	Once	I have never needed to do this	Mature [We understand the underlying mechanisms, and have adequate techniques for monitoring, but there are a few areas where improvements are needed]	Developing [We understand the basics, but much additional science or technique development is required to address some fundamental sources of uncertainty]	Developing [We understand the basics, but fundamental sources of uncertainty remain]	Within a few years	Frequently	A lack of consensus within the science community		A lack of consensus within the science community	Federal GOVERNMENT employee		Early career (1 - 10 yrs)	2021-10-19	White		Female	United States of America
100	1061	TRUE	2021-03-15 09:44:01	Less than 10	None	None	11 to 50	Less than 10	None	Earth Science	Natural Resource Management		Slightly familiar	Not familiar at all	Poorly	No		Personal communication, i.e. just talking to someone about a field		Reading peer-reviewed papers from that discipline,Contacting a colleague in that discipline,A research network, i.e. the Earth Science Research Network		Neither easy nor difficult			Reading peer-reviewed papers from that discipline		Neither easy nor difficult	None	None	None	A few times (x2)	A few times (x2)	I have never needed to do this	Mature [We understand the underlying mechanisms, and have adequate techniques for monitoring, but there are a few areas where improvements are needed]	Advanced [We can quantify the uncertainty and know the driving mechanisms]	Mature [We understand the underlying mechanisms, but there is room for improvement]	>10 years	Frequently	A lack of consensus within the science community		A lack of consensus within the science community	State GOVERNMENT employee		Early career (1 - 10 yrs)	20-49	White		Male	United States of America
100	610	TRUE	2021-03-15 10:38:01	None	Less than 10	11 to 50	None	Less than 10	51 and above	Social Science	Environmental Economics		Moderately familiar	Moderately familiar	Moderately well	Yes	Very familiar	Peer-reviewed paper recommendations from others in my field (including via Twitter feeds),Professional conferences,Ad-hoc through paper reviews or literature reviews for a paper I'm writing		Reading peer-reviewed papers from that discipline,Contacting a colleague in that discipline,Attend a conference		Neither easy nor difficult	No		Reading synthesis papers from peer-reviewed literature		Neither easy nor difficult	1 - 3 papers per year		1 - 3 papers per year	A few times (x2)	A few times (x2)	I have never needed to do this	Developing [We understand the basics, but much additional science or technique development is required to address some fundamental sources of uncertainty]	Developing [We understand the basics, but much additional science or technique development is required to address some fundamental sources of uncertainty]	Developing [We understand the basics, but fundamental sources of uncertainty remain]	>5 years	Rarely	A lack of synthesis,A lack of consensus within the science community,A lack of staff/personnel,Problems in the structure of the management agency (i.e. laws and regulations restrict the management organization or agency in using new science)		Problems in the structure of the management agency (i.e. laws and regulations restrict the management organization or agency in using new science)	Federal GOVERNMENT employee		Early career (1 - 10 yrs)	2021-10-19	White		Male	United States of America
100	1615	TRUE	2021-03-15 11:16:48	None	11 to 50	Less than 10	Less than 10	11 to 50	11 to 50	Life Science	Zoology		I do not have access to the literature	I do not have access to the literature	Moderately well	Yes	Slightly familiar	Peer-reviewed paper recommendations from others in my field (including via Twitter feeds),Personal communication, i.e. just talking to someone about a field,Non peer-reviewed material, i.e. news articles, websites and blogs		Reading peer-reviewed papers from that discipline,Reading synthesis papers from peer-reviewed literature,Contacting a colleague in that discipline,Attend a conference,Textbooks, or other education materials,A research network, i.e. the Earth Science Research Network		Neither easy nor difficult	Yes	I do not have access to the literature	If "other", please tell us what you use:	Google and find secondary literature articles on current topics, follow links to the primary literature they're based on	Somewhat difficult	None	None	None	Several times (x3)	A few times (x2)	I have never needed to do this	Developing [We understand the basics, but much additional science or technique development is required to address some fundamental sources of uncertainty]	Developing [We understand the basics, but much additional science or technique development is required to address some fundamental sources of uncertainty]	Mature [We understand the underlying mechanisms, but there is room for improvement]	>5 years	Sometimes	A lack of consensus within the science community,A lack of staff/personnel,Problems in the structure of the management agency (i.e. laws and regulations restrict the management organization or agency in using new science)		A lack of consensus within the science community	State GOVERNMENT employee		Early career (1 - 10 yrs)	1000 or more	White		Female	United States of America
100	554	TRUE	2021-03-15 12:02:16	11 to 50	None	Less than 10	11 to 50	None	Less than 10	Earth Science	Hydrology		Moderately familiar	Very familiar	Poorly	Yes	Moderately familiar	Professional conferences,Ad-hoc through paper reviews or literature reviews for a paper I'm writing,Personal communication, i.e. just talking to someone about a field		Reading peer-reviewed papers from that discipline		Neither easy nor difficult	Yes	Moderately familiar	Reading peer-reviewed papers from that discipline		Neither easy nor difficult	None	1 - 3 papers per year	4 - 12 papers per year	Several times (x3)	A few times (x2)	I have never needed to do this	Developing [We understand the basics, but much additional science or technique development is required to address some fundamental sources of uncertainty]	Developing [We understand the basics, but much additional science or technique development is required to address some fundamental sources of uncertainty]	Starting [We are just beginning to understand what is going on]	>10 years	I do not know	Problems in the structure of the management agency (i.e. laws and regulations restrict the management organization or agency in using new science)		Problems in the structure of the management agency (i.e. laws and regulations restrict the management organization or agency in using new science)	ACADEMIC		Mid career (10 - 20 yrs)	1000 or more	Other (please specify)	Multi-racial	Female	United States of America
100	542	TRUE	2021-03-15 12:16:46	11 to 50		Less than 10	11 to 50		Less than 10	Earth Science	Fire Ecology		Moderately familiar	Moderately familiar	Moderately well	Yes	Moderately familiar	Peer-reviewed paper recommendations from others in my field (including via Twitter feeds),Professional conferences,Ad-hoc through paper reviews or literature reviews for a paper I'm writing,Personal communication, i.e. just talking to someone about a field		Reading peer-reviewed papers from that discipline,Reading synthesis papers from peer-reviewed literature,Wikipedia,Contacting a colleague in that discipline,Textbooks, or other education materials		Somewhat easy	Yes	Moderately familiar	Google scholar		Somewhat easy	1 - 3 papers per year	1 - 3 papers per year	4 - 12 papers per year	Several times (x3)	Several times (x3)	Somewhat Challenging	Mature [We understand the underlying mechanisms, and have adequate techniques for monitoring, but there are a few areas where improvements are needed]	Developing [We understand the basics, but much additional science or technique development is required to address some fundamental sources of uncertainty]	Developing [We understand the basics, but fundamental sources of uncertainty remain]	>5 years	Sometimes	Too many sources of information,A lack of synthesis,A lack of staff/personnel,Problems in the structure of the management agency (i.e. laws and regulations restrict the management organization or agency in using new science)		Problems in the structure of the management agency (i.e. laws and regulations restrict the management organization or agency in using new science)	ACADEMIC		Mid career (10 - 20 yrs)	1000 or more	White		Female	United States of America
100	483	TRUE	2021-03-15 12:42:19	None	Less than 10	None	None	11 to 50	None	Life Science	Aquatic Ecology		Slightly familiar	Moderately familiar	Poorly	No		Professional conferences,Ad-hoc through paper reviews or literature reviews for a paper I'm writing,Personal communication, i.e. just talking to someone about a field,Non peer-reviewed material, i.e. news articles, websites and blogs		Reading peer-reviewed papers from that discipline,Reading synthesis papers from peer-reviewed literature		Easy	No		Google scholar		Neither easy nor difficult	None	None	None	Many times (>4)	A few times (x2)	Somewhat Challenging	I do not know	Mature [We understand the underlying mechanisms, and have adequate techniques for monitoring, but there are a few areas where improvements are needed]	I do not know	>10 years	Rarely	Problems in the structure of the management agency (i.e. laws and regulations restrict the management organization or agency in using new science)		Problems in the structure of the management agency (i.e. laws and regulations restrict the management organization or agency in using new science)	ACADEMIC		Early career (1 - 10 yrs)	2021-10-19	White		Male	United States of America
100	554	TRUE	2021-03-15 13:12:02	None	None		None	None	None	Earth Science	Natural Resource Management		Not familiar at all	Not familiar at all	Poorly	No		Non peer-reviewed material, i.e. news articles, websites and blogs		Google non-peer reviewed material, i.e. news articles, blogs etc.		Somewhat difficult	No		Wikipedia		Somewhat difficult	None	None	None	A few times (x2)	A few times (x2)	I have never needed to do this	Developing [We understand the basics, but much additional science or technique development is required to address some fundamental sources of uncertainty]	Starting [We are just beginning to understand what is going on]	Starting [We are just beginning to understand what is going on]	>5 years	Rarely	Too many sources of information,Problems in the structure of the management agency (i.e. laws and regulations restrict the management organization or agency in using new science)		Problems in the structure of the management agency (i.e. laws and regulations restrict the management organization or agency in using new science)	PRIVATE-FOR-PROFIT company, business or individual, for wages, salary or commissions		Senior (20 yrs +)	2021-01-04	White		Female	United States of America
100	532	TRUE	2021-03-15 13:25:13	Less than 10	Less than 10	Less than 10	Less than 10	Less than 10	Less than 10	Life Science	Environmental Toxicology		Slightly familiar	Moderately familiar	Poorly	Yes	Moderately familiar	Peer-reviewed paper recommendations from others in my field (including via Twitter feeds),If "other", please tell us what you use:	work-based literature review group ("book club")	Reading peer-reviewed papers from that discipline,Reading synthesis papers from peer-reviewed literature,Google non-peer reviewed material, i.e. news articles, blogs etc.		Somewhat easy	Yes	Moderately familiar	If "other", please tell us what you use:	peer reading group	Somewhat easy	1 - 3 papers per year	1 - 3 papers per year	1 - 3 papers per year	Several times (x3)	Several times (x3)	Somewhat Easy	Mature [We understand the underlying mechanisms, and have adequate techniques for monitoring, but there are a few areas where improvements are needed]	Developing [We understand the basics, but much additional science or technique development is required to address some fundamental sources of uncertainty]	Mature [We understand the underlying mechanisms, but there is room for improvement]	Within a few years	Sometimes	A lack of access to information,A lack of staff/personnel,Problems in the structure of the management agency (i.e. laws and regulations restrict the management organization or agency in using new science)		A lack of access to information	Federal GOVERNMENT employee		Senior (20 yrs +)	1000 or more	White		Female	New Zealand
100	745	TRUE	2021-03-15 13:28:52	None	11 to 50	None	None	51 and above	None	Life Science	Wildlife Biology		Slightly familiar	Extremely familiar	Moderately well	Yes	Very familiar	Regularly reading a particular peer-reviewed journal (or set of journals),Peer-reviewed paper recommendations from others in my field (including via Twitter feeds),Professional conferences,Ad-hoc through paper reviews or literature reviews for a paper I'm writing		Reading peer-reviewed papers from that discipline,Reading synthesis papers from peer-reviewed literature,Contacting a colleague in that discipline		Easy	No		Google scholar		Neither easy nor difficult	1 - 3 papers per year	4 - 12 papers per year	4 - 12 papers per year	A few times (x2)	A few times (x2)	Somewhat Easy	Advanced [We can quantify the uncertainty and know the driving mechanisms]	Mature [We understand the underlying mechanisms, and have adequate techniques for monitoring, but there are a few areas where improvements are needed]	Developing [We understand the basics, but fundamental sources of uncertainty remain]	Within a few years	Frequently	Too many sources of information,A lack of synthesis,A lack of consensus within the science community,Problems in the structure of the management agency (i.e. laws and regulations restrict the management organization or agency in using new science)		Problems in the structure of the management agency (i.e. laws and regulations restrict the management organization or agency in using new science)	ACADEMIC		Senior (20 yrs +)	2021-05-09	White		Male	United States of America
100	714	TRUE	2021-03-15 14:10:27	11 to 50	11 to 50	11 to 50	11 to 50	11 to 50	11 to 50	Social Science	Other	Environmental Sociology	Very familiar	Very familiar	Moderately well	Yes	Very familiar	Regularly reading a particular peer-reviewed journal (or set of journals),Professional conferences,Ad-hoc through paper reviews or literature reviews for a paper I'm writing,Personal communication, i.e. just talking to someone about a field,Non peer-reviewed material, i.e. news articles, websites and blogs		Reading peer-reviewed papers from that discipline,Reading synthesis papers from peer-reviewed literature,Contacting a colleague in that discipline,Attend a conference,Textbooks, or other education materials,A research network, i.e. the Earth Science Research Network		Somewhat difficult	Yes	Very familiar	Reading peer-reviewed papers from that discipline		Somewhat easy	1 - 3 papers per year	1 - 3 papers per year	1 - 3 papers per year	Several times (x3)	Several times (x3)	Somewhat Challenging	Mature [We understand the underlying mechanisms, and have adequate techniques for monitoring, but there are a few areas where improvements are needed]	Developing [We understand the basics, but much additional science or technique development is required to address some fundamental sources of uncertainty]	Mature [We understand the underlying mechanisms, but there is room for improvement]	>10 years	Sometimes	A lack of synthesis		A lack of synthesis	ACADEMIC		Mid career (10 - 20 yrs)	1000 or more	Asian Indian		Female	United States of America
100	590	TRUE	2021-03-15 14:10:49	Less than 10			Less than 10			Earth Science	Natural Resource Management		Slightly familiar	Moderately familiar	Moderately well	No		Professional conferences,Ad-hoc through paper reviews or literature reviews for a paper I'm writing,Personal communication, i.e. just talking to someone about a field		Reading synthesis papers from peer-reviewed literature,Contacting a colleague in that discipline,Attend a conference,Textbooks, or other education materials		Somewhat easy	No		Contacting a colleague in that discipline		Somewhat easy	None	None	None	A few times (x2)	Once	I have never needed to do this	Developing [We understand the basics, but much additional science or technique development is required to address some fundamental sources of uncertainty]	Developing [We understand the basics, but much additional science or technique development is required to address some fundamental sources of uncertainty]	Developing [We understand the basics, but fundamental sources of uncertainty remain]	Within a few years	Sometimes	A lack of synthesis,A lack of staff/personnel,Problems in the structure of the management agency (i.e. laws and regulations restrict the management organization or agency in using new science)		A lack of staff/personnel	Federal GOVERNMENT employee		Mid career (10 - 20 yrs)	50-99	White		Male	United States of America
100	757	TRUE	2021-03-15 14:28:03	Less than 10	None	11 to 50	11 to 50	Less than 10	51 and above	Social Science	Water Resource Management		Slightly familiar	Very familiar	Moderately well	Yes	Very familiar	If "other", please tell us what you use:	Combination of personal communication, newsletters, and twitter	Reading peer-reviewed papers from that discipline,Reading synthesis papers from peer-reviewed literature,Contacting a colleague in that discipline,Google non-peer reviewed material, i.e. news articles, blogs etc.		Neither easy nor difficult	Yes	Slightly familiar	If "other", please tell us what you use:	finding papers and synthesis articles on twitter	Neither easy nor difficult	None	None	None	A few times (x2)	A few times (x2)	I have never needed to do this	Mature [We understand the underlying mechanisms, and have adequate techniques for monitoring, but there are a few areas where improvements are needed]	Developing [We understand the basics, but much additional science or technique development is required to address some fundamental sources of uncertainty]	Developing [We understand the basics, but fundamental sources of uncertainty remain]	>5 years	Sometimes	Too many sources of information,A lack of access to information,A lack of synthesis,A lack of staff/personnel,Other	Specifically, lack of staff/personnel dedicated to understanding new science and updating models. Largely tied to lack of sufficient funding	A lack of staff/personnel	PRIVATE-NOT-FOR-PROFIT, tax-exempt, charitable organization		Early career (1 - 10 yrs)	20-49	White		Female	United States of America
100	593	TRUE	2021-03-15 15:04:01	11 to 50	Less than 10	Less than 10	11 to 50	Less than 10	Less than 10	Earth Science	Sustainability Science			Very familiar	Moderately well	Yes	Very familiar	Regularly reading a particular peer-reviewed journal (or set of journals),Professional conferences,Non peer-reviewed material, i.e. news articles, websites and blogs		Reading peer-reviewed papers from that discipline,Google non-peer reviewed material, i.e. news articles, blogs etc.,Attend a conference,Textbooks, or other education materials,A research network, i.e. the Earth Science Research Network		Somewhat difficult	Yes	Moderately familiar	Reading peer-reviewed papers from that discipline		Somewhat easy	1 - 3 papers per year	1 - 3 papers per year	1 - 3 papers per year	A few times (x2)	A few times (x2)	Somewhat Challenging	Developing [We understand the basics, but much additional science or technique development is required to address some fundamental sources of uncertainty]	Developing [We understand the basics, but much additional science or technique development is required to address some fundamental sources of uncertainty]	Starting [We are just beginning to understand what is going on]	Within a few years	Frequently	Too many sources of information,A lack of synthesis,A lack of consensus within the science community,Problems in the structure of the management agency (i.e. laws and regulations restrict the management organization or agency in using new science)		Problems in the structure of the management agency (i.e. laws and regulations restrict the management organization or agency in using new science)	ACADEMIC		Mid career (10 - 20 yrs)	2021-05-09	Chinese		Female	United States of America
[truncated: 181 more rows]
[truncated: 1 more columns]
